# Supplementary material for: Real‐Time Twitter Trend Analysis Using Big Data Analytics and Machine Learning Techniques
Source: Hindawi journal article supplement (doi:10.1155/2021/3920325), 2021-01-01
Supplement: f1 [file 3920325.f1.txt]

{'text': 'RT @AnfieldWatch: Fabinho has started six Premier League games in midfield since October. Liverpool have won all six of them 🤩 https://t.co…', 'id': 1394327671144960001, 'Usr_loc': 'Accra, Ghana', 'hashtags': []}
{'text': '@SteveThomasNow @SandiaWisdom @BertsBp @mt_stargate Blessed Gaia red_heart  I am truly grateful and humbled to be on this jou… https://t.co/vJ3lFa3rCP', 'id': 1394327818838831104, 'Usr_loc': 'Resident of 🌏 ', 'hashtags': []}
{'text': '@TonyZtigr @adrian_probert and during all of that they have to successfully not destroy themselves, which we humans… https://t.co/1x0KS8NslZ', 'id': 1394327819136741376, 'Usr_loc': None, 'hashtags': []}
{'text': '@KazzyAnnie1 @quarkjr @chris2020cjh @kiwisquaw @MeghanMcCain Mmmhmmm and as usual the entire story behind these use… https://t.co/e42GUDryxR', 'id': 1394327819145019392, 'Usr_loc': 'Los Anxgeles, CA', 'hashtags': []}
{'text': 'Chaplain quoted Marx at the convocation. How are you all doing because Chaplain Erv is based as F***', 'id': 1394327819367469058, 'Usr_loc': 'Dual citizen 🇨🇦/🇺🇸', 'hashtags': []}
{'text': 'RT @kekeysl: money be buying my happiness, ion know bout y’all  loudly_crying_face .', 'id': 1394327819346456577, 'Usr_loc': 'Louisiana, USA', 'hashtags': []}
{'text': 'RT @bigbbyspree: Y’all laugh at Soulja Boy but he deadass was the first rapper to do mad shit', 'id': 1394327819296153603, 'Usr_loc': None, 'hashtags': []}
{'text': 'RT @Farah_Gazan: The sea.. our only entertainment in the open air prison that we live in because of the Israeli siege on Gaza.. all the way…', 'id': 1394327819191205895, 'Usr_loc': 'Islamabad, Pakistan', 'hashtags': []}
{'text': '@TRJForBloggers Returning all comments on my latest post  two_hearts  \n\nhttps://t.co/JOTBGVnLip', 'id': 1394327819426177029, 'Usr_loc': 'England, United Kingdom', 'hashtags': []}
{'text': 'y’all have a good day  face_blowing_a_kiss ', 'id': 1394327819367460866, 'Usr_loc': None, 'hashtags': []}
{'text': '@GCBee7 All 9’s', 'id': 1394327819371614212, 'Usr_loc': None, 'hashtags': []}
{'text': '@ashemusic sigh i’ll be in school when they go on sale - all i want is to see u ugh school gets in the way neutral_face ', 'id': 1394327819338063873, 'Usr_loc': 'we dont define eachother', 'hashtags': []}
{'text': 'RT @kaushikcbasu: Almost all Indians, certainly all who care for the country, are waiting for 2024 the way Indians once waited for 1947.', 'id': 1394327819459596289, 'Usr_loc': None, 'hashtags': []}
{'text': 'super tired of all this feeling &amp; thoughts.', 'id': 1394327819715452931, 'Usr_loc': 'Brooklyn, NY', 'hashtags': []}
{'text': 'RT @charts_k: Jungkook: “Topping the [U.S.] charts, being nominated for the Grammys, getting all those awards, were of course great honors…', 'id': 1394327819593863168, 'Usr_loc': '𓆩♡𓆪 SHE/HER 19', 'hashtags': []}
{'text': 'Donate 90% of your salary plus bonuses Baba', 'id': 1394327819715551232, 'Usr_loc': None, 'hashtags': []}
{'text': '@lpoolcouncil @CruiseLpool What is happening to the new cruise terminal we where promised in 2018 so we don’t have… https://t.co/uzCC7vE58F', 'id': 1394327819723890697, 'Usr_loc': 'Formby, England', 'hashtags': []}
{'text': '@ThanthiTV @adgpi @IAF_MCC @EPSTamilNadu @mkstalin @ikamalhaasan @TTVDhinakaran @rajinikanth @SrBachchan… https://t.co/jiwokWrj5b', 'id': 1394327819656699916, 'Usr_loc': 'Palo Alto, CA. USA', 'hashtags': []}
{'text': 'RT @ozzyetomi: In all relationships, intimacy is what I crave most. I love the feeling of closeness with another human being.', 'id': 1394327820030070786, 'Usr_loc': None, 'hashtags': []}
{'text': 'RT @ToriGlass: i don’t think people don’t know this because of malice, ignorance, or lack of intelligence. i think it’s because western psy…', 'id': 1394327819887464451, 'Usr_loc': None, 'hashtags': []}
{'text': 'My poem “The Friend” was shared by @Poets_For_Peace \n\nIt starts from 6:15\nI’ve recited the poem myself  grimacing_face  grimacing_face  grimacing_face  smiling_face_with_open_mouth_&_cold_sweat  smiling_face_with_open_mouth_&_cold_sweat  smiling_face_with_open_mouth_&_cold_sweat  smiling_face_with_open_mouth_&_cold_sweat \n\nLis… https://t.co/kPX6GusDuQ', 'id': 1394327819778461700, 'Usr_loc': 'Ontario, Canada', 'hashtags': []}
{'text': 'RT @SwoleZaddy: Told y’all it’s really THAT big. Watch till the end https://t.co/mhVpuhGjZm', 'id': 1394327820034314241, 'Usr_loc': None, 'hashtags': []}
{'text': 'RT @PrestonPixie: Nova Scotia gets injunction to block all anti-mask protests AND makes it illegal to promote these rallies on social media…', 'id': 1394327819883274240, 'Usr_loc': 'Etobicoke', 'hashtags': []}
{'text': 'RT @waymoflydenuu: The funniest part is he be having proof lmao', 'id': 1394327819891712005, 'Usr_loc': None, 'hashtags': []}
{'text': 'RT @YeolChanng: HUGS TO ALL YEOLMAES AND EXOLS WHO BELIEVED IN CHANYEOL  loudly_crying_face  loudly_crying_face  loudly_crying_face ', 'id': 1394327820013379589, 'Usr_loc': 'exoplanet', 'hashtags': []}
{'text': 'RT @ilyerene: song eun-yi: when celeb five was promoting, it overlapped with red velvet’s right? they greeted us with “unnies!!” and then s…', 'id': 1394327820134862851, 'Usr_loc': None, 'hashtags': []}
{'text': 'good morning! \ni’m overwhelmed af today by all the things i still need to get done. \nwhat about you all?  relieved_face  https://t.co/BvqiAqboJf', 'id': 1394327819967152135, 'Usr_loc': 'any pronouns ♡ semi ia bc life', 'hashtags': []}
{'text': 'RT @amberkgoodwin: Sorry not sorry in advance for all the law graduation photos y’all are about to get. I’m 41, never been married, have no…', 'id': 1394327820193705988, 'Usr_loc': 'Nigeria', 'hashtags': []}
{'text': 'Happy to be in this statistic! We’ve had no problems w/ internet, love the high vax rate, Amtrak station, Killingto… https://t.co/LUvngWznHH', 'id': 1394327820000759809, 'Usr_loc': 'FL & VT', 'hashtags': []}
{'text': "RT @newscientist: Cuba's bid to vaccinate all citizens with home-grown covid-19 shots https://t.co/CTFP1wuY0b https://t.co/Ytg0fOhKZf", 'id': 1394327820172599298, 'Usr_loc': 'Sequim, WA', 'hashtags': []}
{'text': 'I don’t use Black soap but tea tree oil aloe abs turmeric mixed is a great spot treatment', 'id': 1394327820151701506, 'Usr_loc': None, 'hashtags': []}
{'text': "@bookpreneur Hey everyone smiling_face_with_smiling_eyes  folded_hands  medium_skin_tone , here's my latest post. Returning all comments  red_heart .\nhttps://t.co/QuQopuSukQ", 'id': 1394327820332118018, 'Usr_loc': 'Jamaica', 'hashtags': []}
{'text': "I've never been about the top dog. Ever.\n\nMy family are all U of M fans. Most people in my hometown community, too.… https://t.co/ch9k4QV88o", 'id': 1394327820298563587, 'Usr_loc': 'Miami, Florida', 'hashtags': []}
{'text': 'RT @PatriotGaGa1: God Bless You, @RepMTG  folded_hands  light_skin_tone \nThank you for speaking up, and telling the truth! I have such high respect for you! \nWe know th…', 'id': 1394327820260814849, 'Usr_loc': 'Mars', 'hashtags': []}
{'text': 'RT @AshokTi16110493: @SandeepPole007 @LaxmanPalsamkar @CMOMaharashtra Sir,delay for justice is also injustice, plz immediately follow the H…', 'id': 1394327820457840644, 'Usr_loc': None, 'hashtags': []}
{'text': 'RT @kyeozm: y’all do not panic buy &gt;&lt; yes we want to hit 2M sales but pls prioritize your needs! or u can buy fansign albums! its still cou…', 'id': 1394327820520677378, 'Usr_loc': '🇵🇭//🇰🇷', 'hashtags': []}
{'text': 'breaking out of bad ways of thinking is hard but over time u start to peep life not that deep &amp; we supposed 2 hav fun all the time', 'id': 1394327820629852166, 'Usr_loc': 'Temple Hills, MD', 'hashtags': []}
{'text': 'y’all i’m losin my mind', 'id': 1394327820621463555, 'Usr_loc': None, 'hashtags': []}
{'text': 'RT @lastnightsnora: I’m the friend you can cancel on, it’s definitely ok I won’t be mad at all', 'id': 1394327820541779975, 'Usr_loc': None, 'hashtags': []}
{'text': 'RT @DudasNicholas: @Darlene59144778 @Think_Blue_Sky @AOC This is nonsense. What did Israel do to prevent 9/11??? All they do is take our ha…', 'id': 1394327820705349638, 'Usr_loc': 'London', 'hashtags': []}
{'text': 'RT @m7mdkurd: Almost 200 dead, 2000 wounded, 40,000 displaced. Many of whom said their last words on social media, all of them are betrayed…', 'id': 1394327820646617093, 'Usr_loc': 'Tankari Bandar', 'hashtags': []}
{'text': '@PremiumTimesng So @PremiumTimesng is a useless blog and I’ve been hyping you guys all this while. Better uphold yo… https://t.co/A3wv6HkYCF', 'id': 1394327820600582150, 'Usr_loc': 'Lagos, Nigeria', 'hashtags': []}
{'text': 'RT @notfuniy: Social Media: Take down all the posts about Palestine.\n\nDo you think it will be easy? Oh, no haha.\nWe know that zionis on pan…', 'id': 1394327820591984646, 'Usr_loc': None, 'hashtags': []}
{'text': 'RT @hallamohieddeen: Morning all, just a reminder that our Gaza offices were bombed and destroyed 2 days ago. Israel has yet to provide any…', 'id': 1394327820793430024, 'Usr_loc': None, 'hashtags': []}
{'text': "Now @CaraMcClellan6- Schools serving up_arrow ️%'s of Black &amp; Latinx students are:\n\n-less likely to offer advanced math cour… https://t.co/QSIrZDUzQU", 'id': 1394327820579614723, 'Usr_loc': 'Somerville, MA', 'hashtags': []}
{'text': '@ThickPapiDickk  smiling_face_with_heart-eyes  all for you', 'id': 1394327820906635264, 'Usr_loc': None, 'hashtags': []}
{'text': 'Liked/Retweet By ABoyce\nThe Antonine Romans\nBritish Roman Fiction\n(All Amazon Websites)\nUK https://t.co/7pqZxFWv79… https://t.co/o8XkUchMIS', 'id': 1394327820680237059, 'Usr_loc': 'Glasgow, Scotland, UK', 'hashtags': []}
{'text': 'RT @syupotrico: so do y’all remember that time they said we were like getting a suju documentary', 'id': 1394327821112197120, 'Usr_loc': None, 'hashtags': []}
{'text': 'RT @_dnxw: i used to be the “chaser” in all of my friendships &amp; relationships.. literally begging for reciprocation and to be treated corre…', 'id': 1394327821485445123, 'Usr_loc': None, 'hashtags': []}
{'text': 'What y’all think the poor part of the Soul Society smell like? I bet it smell like cheese and oppression.', 'id': 1394327821535821828, 'Usr_loc': 'FL', 'hashtags': []}
{'text': 'RT @astraeagoods: these cuties are all still available  herb  https://t.co/gPrfsYOMl6', 'id': 1394327821514850305, 'Usr_loc': None, 'hashtags': []}
{'text': '"If all your engineers do is write code, you\'re only getting 50% of their value."\n\nWhy hire smart people to tell th… https://t.co/58srA6ABRr', 'id': 1394327821405798401, 'Usr_loc': None, 'hashtags': []}
{'text': 'Brooo I was waiting at the bus stop in San Fernando &amp; Van Nuys and there was a red light, some old perv in his car… https://t.co/CXlcaEFJSl', 'id': 1394327821623861249, 'Usr_loc': 'Winterfell', 'hashtags': []}
{'text': 'RT @itsShivam18: Give mass engagements in all platforms its released. \n\nTwitter, YouTube, Instagram, everywhere masssss \n\nKINNA SONA X RKV…', 'id': 1394327821791551492, 'Usr_loc': None, 'hashtags': []}
{'text': 'RT @kyeozm: y’all do not panic buy &gt;&lt; yes we want to hit 2M sales but pls prioritize your needs! or u can buy fansign albums! its still cou…', 'id': 1394327821674160133, 'Usr_loc': "이찬's • 🇵🇭", 'hashtags': []}
{'text': '@LawDawe @POTUS @JoeBiden You don’t even know that this game is online! ! ! https://t.co/wZVOyIYLc1', 'id': 1394327821690966016, 'Usr_loc': None, 'hashtags': []}
{'text': '“Payola is alive and well in the music business”, quoted from a fellow musician. We are inclined to agree! Still we… https://t.co/9It8QBETV0', 'id': 1394327821720379395, 'Usr_loc': 'Austin, TX', 'hashtags': []}
{'text': 'RT @AAPDelhi: Women &amp; Child Development Minister Shri @AdvRajendraPal inspects all childcare homes.\n\nHigh quality food and world class faci…', 'id': 1394327821846122497, 'Usr_loc': 'Delhi, India', 'hashtags': []}
{'text': 'RT @daveweigel: BE SMART: The only quoted critic here is Larry Summers.', 'id': 1394327821682683906, 'Usr_loc': 'Boston', 'hashtags': []}
{'text': 'RT @ClareMLopez: Now truth is coming out, NIAID/Fauci, Eco Health Alliance/Daszak, all trying to dance around what they did: work w/known C…', 'id': 1394327821804265478, 'Usr_loc': None, 'hashtags': []}
{'text': '@namshine This decision on outdoor spaces (esp parks) is just so short sighted and against all the evidence. Politi… https://t.co/TDUC1mt33g', 'id': 1394327821628096517, 'Usr_loc': 'Toronto, Ontario', 'hashtags': []}
{'text': 'RT @Real_Stevemalt: We all know this legend right  smiling_face_with_open_mouth_&_cold_sweat  raising_hands ? https://t.co/awomdv7LOu', 'id': 1394327821762367501, 'Usr_loc': 'Amsterdam, The Netherlands', 'hashtags': []}
{'text': 'RT @WorldwideCarats: BBMAs VOTING DAY 8 CHECK IN 1\n\nCarats! Have you voted for Seventeen  for TSA today? Make sure to click the link below…', 'id': 1394327821745541120, 'Usr_loc': None, 'hashtags': []}
{'text': 'see y’all sept. 6th  victory_hand  medium-light_skin_tone  fire ', 'id': 1394327821816778754, 'Usr_loc': 'PNW', 'hashtags': []}
{'text': 'RT @AutSciPerson: They also put a heart rate monitor on him for every single session, not that it says anything about consent at all. They…', 'id': 1394327821905022982, 'Usr_loc': 'Maine, USA', 'hashtags': []}
{'text': "RT @lmorchard: * grapes don't drink wine\n* diamonds can't wear themselves\n* olives can't taste oil\n* seeds die if they don't reach the ligh…", 'id': 1394327821951111170, 'Usr_loc': 'london', 'hashtags': []}
{'text': '@hoeswife @nicksfr  backhand_index_pointing_right Would you like to increase your onlyfans subscribers   hundred_points  hundred_points \n backhand_index_pointing_right We will upload your pictures on my al… https://t.co/b6WOXg45jV', 'id': 1394327821959393289, 'Usr_loc': None, 'hashtags': []}
{'text': 'RT @WONWOOFILES: 1k wonwoo lovers !! it hasn’t been very long since i started this account but i’ve received so much so much and i’m beyond…', 'id': 1394327822005538820, 'Usr_loc': None, 'hashtags': []}
{'text': "I don't know who needs to hear this, but if you're on Twitter complaining about Amy Comey Barrett and SCOTUS possib… https://t.co/roV6sym1r2", 'id': 1394327822026657799, 'Usr_loc': 'Sick & Tired', 'hashtags': []}
{'text': 'RT @AbdulElSayed: Words like "both sides" \n\n"Long history"\n\n"Religious conflict"\n\n"1000s of yrs"\n\nare used to blur context &amp; sanitize oppre…', 'id': 1394327822143954944, 'Usr_loc': 'San Francisco, CA', 'hashtags': []}
{'text': '@frenchiquitin @VoRLCDP Arturo is just the annoying factor. Jesus said since seasons 1/2, so I think it includes al… https://t.co/YZfZach9Z8', 'id': 1394327822102142979, 'Usr_loc': 'Munich/Rio', 'hashtags': []}
{'text': 'RT @dorisolaitan_: A relationship where y\'all "fix it" together with respectable communication&gt;&gt;&gt;', 'id': 1394327822227939330, 'Usr_loc': 'South Carolina, USA', 'hashtags': []}
{'text': "I don't have all that many followers or think tweeting really does any good, but just to be clear, the State of Isr… https://t.co/efk0MQUZ7N", 'id': 1394327822198468612, 'Usr_loc': 'Seattle, Washington', 'hashtags': []}
{'text': 'RT @Rasmussen_Poll: Good Morning !\n\n2020 Election Integrity: Arizona - Senate Forensic Audit -  New Statement from Donald J Trump &amp; Related…', 'id': 1394327822206898184, 'Usr_loc': 'New England, (near the cape)', 'hashtags': []}
{'text': '@KMC4wauk @TimRunsHisMouth @VP Don’t worry, his comment is directed at only one person who happens to be a woman, n… https://t.co/r0UrfPHsjW', 'id': 1394327822349455361, 'Usr_loc': 'CA Flyover Country', 'hashtags': []}
{'text': 'MINGYU  glowing_star  GIVING ME ALL THE SEROTONIN I NEEDED', 'id': 1394327822294945796, 'Usr_loc': '17 he/him', 'hashtags': []}
{'text': 'RT @F_rida_h: Follow all who likes and Retweets this  pancakes ,  hot_pepper ️!', 'id': 1394327822395707393, 'Usr_loc': None, 'hashtags': []}
{'text': "RT @PPAdvocacyMA: Let's be explicit: anti-abortion extremists made it clear that this was the goal all along. It's why they couldn't wait t…", 'id': 1394327822186000385, 'Usr_loc': 'United States', 'hashtags': []}
{'text': 'it\'s all "feminism" until it comes to the artist y\'all don\'t like', 'id': 1394327822479601671, 'Usr_loc': 'she/they', 'hashtags': []}
{'text': 'RT @memcalea_maire: @andyseedauthor , my 8yr old daughter is off school as a little unwell ( on the mend though ). She is totally engrossed…', 'id': 1394327822559240198, 'Usr_loc': 'Gloucestershire, UK', 'hashtags': []}
{'text': "RT @hutlab: We'd also like to highlight the many wonderful poster submissions we received this year! They are all available, along with aud…", 'id': 1394327822534066177, 'Usr_loc': None, 'hashtags': []}
{'text': 'RT @monohoe_: Congrats to everyone having a baby. Congrats to all the college graduates. Congrats to everyone purchasing a home. Congrats o…', 'id': 1394327822638800898, 'Usr_loc': 'Los Angeles • Santa Barbara', 'hashtags': []}
{'text': '@DionApollo @JustAFballFan Hey man I’m down with all that let’s go', 'id': 1394327822676598795, 'Usr_loc': 'Bay Area ', 'hashtags': []}
{'text': 'this is the only time the sex bangs — when y’all both are sexually attracted to each other, when y’all genuinely ca… https://t.co/9L6hSVZ9w2', 'id': 1394327822509002756, 'Usr_loc': 'all around the world ', 'hashtags': []}
{'text': '@TrolllMaaster @vidalmonoko if you’re have humanity, you will choose the most right side regardless of the religion… https://t.co/bNRrkAmmRl', 'id': 1394327822513188864, 'Usr_loc': None, 'hashtags': []}
{'text': 'reminded of someone i used to associate with and gave myself the ick all over again', 'id': 1394327822827757570, 'Usr_loc': None, 'hashtags': []}
{'text': 'RT @yeahshewrites: @ChloeChantelle1 @Ashrouen Ahhh men… always minding the business that never pays them. Chile anyways…. Congratulations d…', 'id': 1394327822777393159, 'Usr_loc': 'London, England', 'hashtags': []}
{'text': 'where are all the gay people???? where are they???? i have no one yo have sex with ????(((? wya ??', 'id': 1394327822911541254, 'Usr_loc': '🏳️\u200d🌈he/him, 16', 'hashtags': []}
{'text': 'RT @m7mdkurd: Almost 200 dead, 2000 wounded, 40,000 displaced. Many of whom said their last words on social media, all of them are betrayed…', 'id': 1394327822974529537, 'Usr_loc': 'any pronouns.', 'hashtags': []}
{'text': 'shinee really cleared the industry with odd like listening back it was a reset for korea they sent all the girlies… https://t.co/roK2Io8zBG', 'id': 1394327822949289988, 'Usr_loc': 'Lee Jooheon is a South Korean rapper and songwriter. He is a member of South Korean boy group Monsta X.', 'hashtags': []}
{'text': 'it’s true! i’ve seen this happen when my tweet accidentally got more likes than yong’s... friends turn on you so qu… https://t.co/kaeirqU7qH', 'id': 1394327823050018820, 'Usr_loc': 'they/19', 'hashtags': []}
{'text': 'RT @lastnightsnora: I’m the friend you can cancel on, it’s definitely ok I won’t be mad at all', 'id': 1394327823070990341, 'Usr_loc': None, 'hashtags': []}
{'text': 'RT @poonamkachandd: I am sorry. Forgot to add his bank details. Thank you. Please do try. https://t.co/ZIid0uSKpH https://t.co/jSMrN1aHqq', 'id': 1394327823066701825, 'Usr_loc': None, 'hashtags': []}
{'text': 'this that cawk music y’all like?\n\n https://t.co/9d1hiZamfS', 'id': 1394327823230324737, 'Usr_loc': 'white', 'hashtags': []}
{'text': '@VidadalaRajini All the best madam great work on covid time... https://t.co/2ygusEGaM6', 'id': 1394327823016337408, 'Usr_loc': 'Thallur , Prakasam District', 'hashtags': []}
{'text': 'So many characters live within us.. all looking for love.', 'id': 1394327825692381192, 'Usr_loc': 'ÜT: 38.975121,-76.888847', 'hashtags': []}
{'text': 'marry me juliet youll never have to be alone i love you and thats all i really know https://t.co/nQgjr7KS0z', 'id': 1394327825604284419, 'Usr_loc': 'Rihanna', 'hashtags': []}
{'text': 'RT @__gaciria: "Topping the US charts, being nominated for the Grammys, getting all those awards, were of course great honors and great exp…', 'id': 1394327825667264515, 'Usr_loc': None, 'hashtags': []}
{'text': "RT @Stonekettle: WHY HASN'T BIDEN CHANGED ALL THE FEDERAL AND STATE LAWS SO I CAN GET HIGH?!?! WHY HASN'T HE FIXED THE WHOLE WORLD?! IT'S B…", 'id': 1394327825709248518, 'Usr_loc': 'Florida, USA', 'hashtags': []}
{'text': 'RT @sanbaabyy: Atinys please focus on ateez and make more wf accs, u all know the rumor already and know that all rank related rumors were…', 'id': 1394327825772072967, 'Usr_loc': 'she/her|16| intj-t ', 'hashtags': []}
{'text': 'RT @Nkinga_: You all know who will be paying Wim Trengove because ANC can’t even afford even salaries. He represents him in all his matters…', 'id': 1394327825650438150, 'Usr_loc': 'South Africa', 'hashtags': []}
{'text': 'RT @MsRoyalY: Y’all Grey still saying thank you and he be eating good af https://t.co/CBhJ2omDfF', 'id': 1394327825918963715, 'Usr_loc': None, 'hashtags': []}
{'text': 'Appreciate everything you have in life cause one day your gonna lose it all hundred_points  https://t.co/Z09ffcU94w', 'id': 1394327825759588356, 'Usr_loc': None, 'hashtags': []}
{'text': 'RT @Omkar_Raii: Govt. initiatives to improve IT infra, increasing demand for cloud-based virtual service and growing trend of bringing own…', 'id': 1394327825990131718, 'Usr_loc': 'Chennai, India', 'hashtags': []}
{'text': 'Very excited about all and especially seeing @DivinoNinoband in person again  smiling_face_with_heart-eyes ', 'id': 1394327825969258496, 'Usr_loc': 'Chicago, IL', 'hashtags': []}
{'text': 'RT @RedWingGrips: You guys do realize that the reason the CDC rolled back all of these restrictions and guidelines with zero explanation is…', 'id': 1394327826040508418, 'Usr_loc': 'United states', 'hashtags': []}
{'text': "@techbabemd As your friend said... You've got honours their father can't attain. That's more lasting even. Alhamdul… https://t.co/FeoJPaYXW5", 'id': 1394327825860149252, 'Usr_loc': 'kayi obasi🇹🇷', 'hashtags': []}
{'text': '@Kwesi_Thomps You people deserve all the stress you’re going through.. mmoa! Trophyless and europa loading 🤪', 'id': 1394327826120290313, 'Usr_loc': 'Hamburg, Germany', 'hashtags': []}
{'text': 'RT @yofancy_: Im glad I got my heart broke young, y’all be 30 still believing niggas face_with_tears_of_joy ', 'id': 1394327826229235712, 'Usr_loc': None, 'hashtags': []}
{'text': 'Y’all prepping for the stroke off???', 'id': 1394327826397114374, 'Usr_loc': 'thesweetspot', 'hashtags': []}
{'text': 'RT @Kay61059210: Just me in the tub, taking pics/vids for all my babes on my OnlyFans  eyes  smirking_face \n  growing_heart Link in bio babes growing_heart  https://t.co/EFB3NLNPx6', 'id': 1394327826380169219, 'Usr_loc': 'Pacific Northwest', 'hashtags': []}
{'text': 'Totally agree  raising_hands  light_skin_tone ! I’m there  victory_hand  light_skin_tone and I think millions of others  sheep sheepfold too  blue_heart ! Lets join our hands man_and_woman_holding_hands  together to bui… https://t.co/j6GXIqKCqe', 'id': 1394327826174709764, 'Usr_loc': '德国', 'hashtags': []}
{'text': 'RT @MFuturewala: Finally, the family or diners get another taste of the salt. According to the Prophet MohammedSA, tasting salt before and…', 'id': 1394327826300510210, 'Usr_loc': None, 'hashtags': []}
{'text': 'or maybe u dont even care at all', 'id': 1394327826480967680, 'Usr_loc': 'Balearic Islands, Spain', 'hashtags': []}
{'text': '@Holy_TrinityEFC @Bluebailey55 @ElMuchachoEFC Agreed Alan, we got to stop long term 5 year contracts, stop over pri… https://t.co/1iDfi3Dhpq', 'id': 1394327826346749956, 'Usr_loc': 'ENGLAND', 'hashtags': []}
{'text': 'Protesters got abducted as terrorists violently cracked down the protest crowd with vehicles and gunfires.… https://t.co/G885PN4kEB', 'id': 1394327826271137793, 'Usr_loc': 'Myanmar', 'hashtags': []}
{'text': '@jayjensix @jaketapper The American Jews made personnel decisions to live in the US. Why is it that all Jews and Is… https://t.co/qQId9UPKDx', 'id': 1394327826313191434, 'Usr_loc': None, 'hashtags': []}
{'text': 'I can’t believe…after all this time. All the death. All the loss. Visible changes in society. People still have the… https://t.co/c4uP3RnG5D', 'id': 1394327826506080257, 'Usr_loc': 'she/her/they', 'hashtags': []}
{'text': 'RT @iam_tilash: Baddo don’t Air me oo  weary_face  weary_face  ROCK so good I had to do a COVER  fire  fire  fire \n\nY’all kindly tag @Olamide please 🥺 folded_hands \n\nCc: @Midetweet @arahmee…', 'id': 1394327826556497921, 'Usr_loc': None, 'hashtags': []}
{'text': 'RT @TheMoonHerald: All Mew’s Fans after several days without Mr. MewSuppasit contents, and suddenly today we have 3 Times Trending! \n#ทีป็อ…', 'id': 1394327826589904900, 'Usr_loc': None, 'hashtags': []}
{'text': 'And I’m NOT a Stan , never been a lebron fan and I’m still not lmao. He just so happens to play for my favorite tea… https://t.co/qIP5fu4S1X', 'id': 1394327826552147970, 'Usr_loc': 'San Diego, CA', 'hashtags': []}
{'text': 'I tweaked my reply all response to my summer internship welcome email 10x like it was my first message on The Circle', 'id': 1394327826749444098, 'Usr_loc': 'NY ✈️ GA', 'hashtags': []}
{'text': 'RT @itsfkntxna: here’s another donation link for palestinians, all the proceeds will all be delivered to palestinians personally in august…', 'id': 1394327826820591623, 'Usr_loc': None, 'hashtags': []}
{'text': "RT @Mikeggibbs: @politicsfisher @TorontoStar I think you're absolutely right. I don't see a way out for him either. I don't think it's reco…", 'id': 1394327826858446853, 'Usr_loc': None, 'hashtags': []}
{'text': 'RT @misanthropicc92: Someone once said Twitter is the sociology seminar where no one has done the reading but everyone is speaking. I think…', 'id': 1394327826778791937, 'Usr_loc': 'new york | she/her | 20', 'hashtags': []}
{'text': '@AntrimLoyalist Was playing in the Creggan, March - July. Taking in the Orange Day marches on Edenderry field. Hard… https://t.co/TUtyQjdPgh', 'id': 1394327826686517253, 'Usr_loc': 'England, United Kingdom', 'hashtags': []}
{'text': 'RT @InuKishu: We will be doing an official Rebrand of our current logo on all of our social media platforms and will be updating it across…', 'id': 1394327826753626121, 'Usr_loc': None, 'hashtags': []}
{'text': 'RT @BKingreborn2: Wanna see more? \nSUBSCRIBE NOW!  30 days free trial to all new subscribers still available \n\nLINK ON MY BIO https://t.co/…', 'id': 1394327826900439041, 'Usr_loc': None, 'hashtags': []}
{'text': "RT @ByronYork: 'Many [migrants] are entering the US through wide openings in the border wall near Yuma, Arizona, sparing them from the risk…", 'id': 1394327826929704968, 'Usr_loc': 'Virginia, USA', 'hashtags': []}
{'text': '@vaibhav_0976 @InsanelyMean @iamfirkiii @iamNotFirkii  face_with_tears_of_joy  face_with_tears_of_joy this is what twitter is all about bruh pensive_face ', 'id': 1394327827151949824, 'Usr_loc': 'India', 'hashtags': []}
{'text': "RT @KhariKhonsu: Remember how I got kicked out for being gay? Now, I need $150 for rent monthly starting this Wednesday. I've been using al…", 'id': 1394327827177115649, 'Usr_loc': 'Salem Oregon', 'hashtags': []}
{'text': 'Much respect to every single person who does translation or interpretation. You all are amazing!', 'id': 1394327827206508550, 'Usr_loc': None, 'hashtags': []}
{'text': 'In Taunggyi, Shan State, junta thugs inspect all the bypassing vehicles in front of Hnin Lwin Lwin Photography shop… https://t.co/5f4gB5qqAi', 'id': 1394327826887700481, 'Usr_loc': None, 'hashtags': []}
{'text': 'RT @ImSpeaking13: Dear Kyle Rittenhouse supporters,\n\n1. When you bring a weapon to a protest, you are looking for trouble.\n2. Nobody would…', 'id': 1394327827223359505, 'Usr_loc': None, 'hashtags': []}
{'text': 'All i know is ... dem folks have a boy nd gimme a nep ... LEAGUEEEEEE  face_with_tears_of_joy  fire ', 'id': 1394327827290415104, 'Usr_loc': None, 'hashtags': []}
{'text': 'RT @WorldwideCarats: FRIDAY IS THE START OF TRACKING WEEK FOR BILLBOARD CHARTS. \n\nLET US GIVE OUR ALL SUPPORT FOR THEIR 8TH MINI ALBUM\n\nLET…', 'id': 1394327827260923904, 'Usr_loc': '日本 東京', 'hashtags': []}
{'text': 'Y’all really be having mfs thinking y’all solid and idk how cause you can’t fake this shit', 'id': 1394327827424714756, 'Usr_loc': None, 'hashtags': []}
{'text': 'RT @_dnxw: i used to be the “chaser” in all of my friendships &amp; relationships.. literally begging for reciprocation and to be treated corre…', 'id': 1394327827412041737, 'Usr_loc': 'on your mind', 'hashtags': []}
{'text': 'RT @pattyrodriguez: I am RT this again because.', 'id': 1394327827390951424, 'Usr_loc': None, 'hashtags': []}
{'text': "RT @RightWingCope: Dan Crenshaw is trending and we all know he wouldn't be in office if it wasn't for gerrymandering https://t.co/SVmjVSs3o6", 'id': 1394327827370156040, 'Usr_loc': 'texas', 'hashtags': []}
{'text': 'I rlly live for this man, literally pushed myself to finish all the tasks for this week, so exhausting weary_face  pensive_face ', 'id': 1394327827336470531, 'Usr_loc': None, 'hashtags': []}
{'text': 'to everyone who has assignments due or exams around the time of mamamoo’s comeback i wish you all the best and let’… https://t.co/0ExWwupYrh', 'id': 1394327827391029262, 'Usr_loc': 'she/her 22', 'hashtags': []}
{'text': 'RT @SkeeAlii: How y’all foreshadowing being in a toxic co-parenting situation even in hypotheticals?', 'id': 1394327829874155524, 'Usr_loc': 'California City, CA', 'hashtags': []}
{'text': '@MooBaby7 I road that hoe all the way to the plat  rolling_on_the_floor_laughing ', 'id': 1394327829916045316, 'Usr_loc': 'Birmingham, AL', 'hashtags': []}
{'text': 'RT @visitBlackpool: The giant 70m skyline is one of the largest sand drawings ever to be created in Blackpool, taking almost six hours to c…', 'id': 1394327830041927688, 'Usr_loc': 'North West, England', 'hashtags': []}
{'text': 'RT @justinamash: In 1948, Israeli forces expelled my father and his family from their home in Ramle. Jews, Christians, Muslims, and Druze h…', 'id': 1394327829962235906, 'Usr_loc': 'Gun Rue, Michigan, USA', 'hashtags': []}
{'text': 'RT @AfricanUnion_: Drop handles &amp; follow all likes doughnut ', 'id': 1394327830130044929, 'Usr_loc': 'Africa', 'hashtags': []}
{'text': "RT @YoukaiYume_Art: Mermaid Sesshomaru and Pals for this month's Mermay merch rewards on Patreon for all $10+ pledges. Flounder!Rin and Seb…", 'id': 1394327829978959877, 'Usr_loc': None, 'hashtags': []}
{'text': 'as a person who has thought about the issue too much: I am 100% convinced, without any question at all, that invisi… https://t.co/wr3CpRL0db', 'id': 1394327830050349057, 'Usr_loc': None, 'hashtags': []}
{'text': '@AKinkhabwala Should’ve sent all that to Colorado so nursing mom/volleyball coaches wouldn’t have to choose between… https://t.co/pQiu0farxH', 'id': 1394327830159413257, 'Usr_loc': 'Aurora, Co', 'hashtags': []}
{'text': 'RT @Farda_Alphonso: He got to do me first to show me he’s all business.', 'id': 1394327829349818373, 'Usr_loc': None, 'hashtags': []}
{'text': 'The market’s all about sentiment.', 'id': 1394327830285062155, 'Usr_loc': None, 'hashtags': []}
{'text': 'RT @CaucasianJames: y’all mind if i have a good week', 'id': 1394327830377340930, 'Usr_loc': None, 'hashtags': []}
{'text': 'RT @_makedaz: all the dope boys gon’ feel her https://t.co/QiUTbptKkb', 'id': 1394327830411063297, 'Usr_loc': None, 'hashtags': []}
{'text': "@NFL That's because almost all the top half have to play the Browns  smiling_face_with_sunglasses ", 'id': 1394327830293630978, 'Usr_loc': 'Panamá', 'hashtags': []}
{'text': 'RT @JoyVotingTeam: READY FOR JOY SOLO DEBUT?\n\nPlease download all the apps are needed for Music Shows voting criteria. Let’s pay back all J…', 'id': 1394327830138343425, 'Usr_loc': 'she/her • 20 • rv shinee namie', 'hashtags': []}
{'text': 'RT @FatihSeferagic: The World is Silent – Will YOU Speak up?  police_car_light \n\n“Where are you?” the man in the video asks.\n\nThey are asking where are the…', 'id': 1394327830406725633, 'Usr_loc': None, 'hashtags': []}
{'text': 'All this short term noise is petty and dumb.\n\nWhat are you doing now until the 2024 halving?', 'id': 1394327830515888128, 'Usr_loc': None, 'hashtags': []}
{'text': 'RT @volleyballworld: VNL Dream Team Spotlight: Macris 🇧🇷.\n\nBrazil\'s "Vegan Fairy" 🧚 is one of the 3 setters on the roster to lead Brazil fo…', 'id': 1394327830503305218, 'Usr_loc': 'Belo Horizonte, Brazil', 'hashtags': []}
{'text': 'RT @Omar_Gaza: All my respect to Muna Al Kurd, @m7mdkurd who is so strong, brave &amp; outspoken defying heavily armed soldiers with nothing bu…', 'id': 1394327830578798599, 'Usr_loc': None, 'hashtags': []}
{'text': 'RT @John_Greed: WIN our Marcasite &amp; Turquoise Bee Necklace  red_heart \n\n heavy_check_mark  Retweet this post \n heavy_check_mark  Follow John Greed on Twitter \n\n*We have posted this co…', 'id': 1394327830591418371, 'Usr_loc': 'Sheffield, England', 'hashtags': []}
{'text': 'putting off my taxes until the last possible minute and trying to retcon it as a form of protest, getting yelled at… https://t.co/Yv3HbxdQtk', 'id': 1394327830557863937, 'Usr_loc': 'big pile of mud', 'hashtags': []}
{'text': 'RT @Survivingagain: Take a walk with me\n     Down to the dark side \n  Into a place of no return \nWere all your desires will be met ~ https:…', 'id': 1394327830717108226, 'Usr_loc': 'In a book somewhere ', 'hashtags': []}
{'text': 'With the playoffs starting Wednesday for the all-Canadian division and the current COVID-19 restrictions, how are y… https://t.co/8R62l0OhnM', 'id': 1394327830637514754, 'Usr_loc': 'toronto, ontario', 'hashtags': []}
{'text': 'RT @shawarmaking01: A very big happy birthday @FineAkuregirl .\nFrom all of us @shawarmaking01 . We love you .\nHave a fabulous day. 🥳🥳🥳🥳 htt…', 'id': 1394327830650101764, 'Usr_loc': 'Ibadan', 'hashtags': []}
{'text': 'RT @Neerajkundan: Expressing my sincere gratitude to the visionary leader Shri @RahulGandhi Ji for his constant guidance.\n\nA heartfelt appr…', 'id': 1394327830763343876, 'Usr_loc': 'Jaipur, India', 'hashtags': []}
{'text': "[CLOSED]\n\nHi I am now closing this acc. Thank you so much for all the memories. To my old and new friends i'll reme… https://t.co/jmLiYkcfp1", 'id': 1394327830884847619, 'Usr_loc': 'she/her , 17 , OT7', 'hashtags': []}
{'text': 'RT @OfficiallyIce: Yo allergies. Y’all win man damn.', 'id': 1394327830859759616, 'Usr_loc': None, 'hashtags': []}
{'text': 'RT @Murisanvlogs: I been streaming and cleaning all morning and the hyung line in tear just hits. https://t.co/rBj9cEP2Z2', 'id': 1394327830947778561, 'Usr_loc': 'California, USA', 'hashtags': []}
{'text': 'RT @khairul_hafidz: This is a very important message to all. Please follow this advice.', 'id': 1394327830779994116, 'Usr_loc': 'Perak, Malaysia', 'hashtags': []}
{'text': 'RT @dinnytellme: @SamSenev i mind brief, muted uproar in msm when Obama signed global pact kicking off\nUN AGENDA 21;\nnow not t b cnfsd wi G…', 'id': 1394327831040217091, 'Usr_loc': None, 'hashtags': []}
{'text': 'RT @iamlaurenp: This has slain me all day. \n\nDogs are just the best. https://t.co/Tx3PgnqvaH', 'id': 1394327831086125056, 'Usr_loc': None, 'hashtags': []}
{'text': 'RT @arrameen: Truly humbled by the love you all have shown towards the song with brother @thisisysr , words don’t match up to thank each on…', 'id': 1394327831044190209, 'Usr_loc': 'Chennai, India', 'hashtags': []}
{'text': 'RT @PetersWonderboy: Thanks to all who went out to support JZ. We hope other provinces will follow the example of the KZN PEC to openly sup…', 'id': 1394327830910193676, 'Usr_loc': 'Durban, South Africa', 'hashtags': []}
{'text': 'Hi @vuecinemas - went to a screening of Spiral this afternoon in Cwmbran - I enjoyed the experience and the staff w… https://t.co/E2hrx5Okh9', 'id': 1394327831036010497, 'Usr_loc': 'Abergavenny', 'hashtags': []}
{'text': "@Takeito99428406 @Ann__Chris @BBCNews The EU are conspiracy theories people too ?  I didn't know it was all spread… https://t.co/jmVnPk69QG", 'id': 1394327831023325184, 'Usr_loc': 'Sussexing into the sea to see.', 'hashtags': []}
{'text': 'RT @SimoneKolysh: Let mothers talk about hating being a mother. Let mothers talk about being trapped by motherhood. Let mothers talk about…', 'id': 1394327831245590528, 'Usr_loc': 'Malaysia', 'hashtags': []}
{'text': '@AbolaMichelle @NYGovCuomo they literally just started vaccinating 12-15 year olds and it takes 5 weeks to be fully… https://t.co/Cba3pAuH6e', 'id': 1394327830977200130, 'Usr_loc': 'dover plains, ny', 'hashtags': []}
{'text': 'RT @ManaArts: Happy 10th anniversary Witcher 2! I am honored to be one of the illustrators featured in the article.  smiling_face_with_open_mouth_&_smiling_eyes  Thank you so much @co…', 'id': 1394327831111512066, 'Usr_loc': 'Düsseldorf, NRW', 'hashtags': []}
{'text': 'RT @DimiccoDiana: "never judge a book by it\'s cover"\n\nWhat it means: The outward appearance of a person isn\'t all there is to them. There\'s…', 'id': 1394327831258320896, 'Usr_loc': None, 'hashtags': []}
{'text': "RT @F1: Iconic drivers, all now yours to own in F1 2021 🤩\n\nRace with seven of F1's greatest drivers in My Team mode with the Deluxe Edition…", 'id': 1394327831237251077, 'Usr_loc': 'eh/him/el ', 'hashtags': []}
{'text': 'RT @OpenYourWallett: Hey y’all, a Black Trans Man really needs funds  for a car. Please circulate this. https://t.co/5UYMiKfLRJ', 'id': 1394327831186923522, 'Usr_loc': 'read carrd byf | BLM', 'hashtags': []}
{'text': 'RT @anguillaman2: @POTUS Way past the time when we should have universal healthcare for all of our citizens', 'id': 1394327831358869508, 'Usr_loc': None, 'hashtags': []}
{'text': 'Funny I thought I was the only one that really really loved the soundtrack of R+J!', 'id': 1394327831182823429, 'Usr_loc': 'San Francisco ', 'hashtags': []}
{'text': 'RT @MikeCrisolago: Head\'s up: the "You\'re violating my personal freedom by forcing me to wear a mask" super-spreader crowd is about to try…', 'id': 1394327831224758272, 'Usr_loc': ' PA', 'hashtags': []}
{'text': 'RT @LoadsOnLoads: We were edging all day so we could finally give him out massive loads  sweat_droplets  https://t.co/kIouPDHEku', 'id': 1394327831367327744, 'Usr_loc': None, 'hashtags': []}
{'text': 'True', 'id': 1394327831296061443, 'Usr_loc': None, 'hashtags': []}
{'text': 'I feel so much lighter and carefree having finally dropped all those FUDdy duddies this past week.', 'id': 1394327834261344261, 'Usr_loc': 'Denver, CO', 'hashtags': []}
{'text': '@IronDuckjcm Wait air doesn’t have a lot of protein, I hope you all are nourishing yourselves properly', 'id': 1394327834236235782, 'Usr_loc': None, 'hashtags': []}
{'text': 'I got a good haul of plants too and some bluebells wrapped in newspaper. Our lunch was amazingly though out, vegan… https://t.co/Vn667C9C09', 'id': 1394327833049190400, 'Usr_loc': None, 'hashtags': []}
{'text': 'RT @almostdita:  cat_face  We believe that these two companies will work together to create a better life for all Indonesians. \n\n hamster_face Once again, congra…', 'id': 1394327834374512641, 'Usr_loc': 'india', 'hashtags': []}
{'text': "@fantasydrip05 Miss panna lam chance ae illa..\nMiss panna poi paapen..this will become AK's work then ..he will do… https://t.co/hOMa8xGfFc", 'id': 1394327834324213762, 'Usr_loc': 'CHENNAI, INDIA', 'hashtags': []}
{'text': "RT @iyad_elbaghdadi: We're not free until we're all free, we're not safe until we're all safe. Nobody gets left behind.", 'id': 1394327834513006595, 'Usr_loc': 'India', 'hashtags': []}
{'text': '@longoffthatee You tough fam, you been though a lot. I know surgery is not fun at all. I got you in my prayers, tha… https://t.co/L07fkO2rf7', 'id': 1394327834429071361, 'Usr_loc': 'The Bay', 'hashtags': []}
{'text': "RT @supermoongirl9: y'all are like 'capricorns wear suits and love money' when the most spiritual and even witchcraft practices oriented I…", 'id': 1394327834521477122, 'Usr_loc': None, 'hashtags': []}
{'text': 'RT @nikkigalrani: Multiple roles,preparations, emotions, laughter, drama &amp; a lot more.These 7 years in the industry,I owe it to all of u cherry_blossom I…', 'id': 1394327834521346055, 'Usr_loc': 'India', 'hashtags': []}
{'text': 'RT @taurusdirection: all of the boys being silent about palestine makes me so uncomfortable @Harry_Styles @NiallOfficial @Louis_Tomlinson @…', 'id': 1394327834613661700, 'Usr_loc': None, 'hashtags': []}
{'text': "@andreagalllindo Ain't gon lie, we all feel that way...time limits us in very many ways, I feel like you can step o… https://t.co/TfalhnZkq4", 'id': 1394327834462654464, 'Usr_loc': None, 'hashtags': []}
{'text': 'RT @Pastor__West: Dear Lord,\n\nToday, bless the week ahead. May I no longer live in fear, but be open to receive all the abundance and prosp…', 'id': 1394327834613587971, 'Usr_loc': '☀️Sunny California ☀️', 'hashtags': []}
{'text': "Can y'all tell how I'm showing how much I love Andrew Wiggins now that the Raptors aren't playing in the playoffs", 'id': 1394327834718621701, 'Usr_loc': 'Regent Park, Toronto', 'hashtags': []}
{'text': '@AnnRich83062605 @WalshFreedom That’s fine. We all need a little comic relief  smiling_face_with_open_mouth_&_cold_sweat ', 'id': 1394327834689261570, 'Usr_loc': None, 'hashtags': []}
{'text': 'RT @lastnightsnora: I’m the friend you can cancel on, it’s definitely ok I won’t be mad at all', 'id': 1394327834852724737, 'Usr_loc': None, 'hashtags': []}
{'text': '@ncostanzo24 They are all tyler Wade burners', 'id': 1394327834827575299, 'Usr_loc': None, 'hashtags': []}
{'text': 'RT @Jai_Not_Nice: One thing about me I will sit in my house all day at peace', 'id': 1394327834823376898, 'Usr_loc': '32 World. Rest Easy Love', 'hashtags': []}
{'text': 'RT @ohcauseshesdead: CDC this.... CDC that ... when you gonna c that I’m the one who understands you been here all along so why can’t you s…', 'id': 1394327834877902852, 'Usr_loc': 'she/her', 'hashtags': []}
{'text': 'RT @ToriGlass: i don’t think people don’t know this because of malice, ignorance, or lack of intelligence. i think it’s because western psy…', 'id': 1394327834932523008, 'Usr_loc': None, 'hashtags': []}
{'text': '@krittiyaClark My clients are all through twitter! I build in public and they usually contact me', 'id': 1394327835041468424, 'Usr_loc': 'Bath, UK', 'hashtags': []}
{'text': 'I know, that you need to get even\nAnd I know, it’s for all the right reasons', 'id': 1394327835066699778, 'Usr_loc': None, 'hashtags': []}
{'text': 'RT @mterstegen1: An update for all of you. Thank you for all your support throughout a difficult season and stay healthy!\nMy message is her…', 'id': 1394327835108466689, 'Usr_loc': None, 'hashtags': []}
{'text': '@RuleXRP @PACcoinOfficial James Rule you are thick as sh*t. All credibility has gone out the window since you start… https://t.co/10fIJNL4iv', 'id': 1394327834747879425, 'Usr_loc': 'Keplar 452b 🛸', 'hashtags': []}
{'text': 'night calls with u is all i need🤍', 'id': 1394327835167367169, 'Usr_loc': 'Dubai, United Arab Emirates', 'hashtags': []}
{'text': "@Ntsiki_Kanata ... As much as children need love and a good home, I can't provide that as yet. I'm still trying to… https://t.co/zjnWS6p4ma", 'id': 1394327835234512898, 'Usr_loc': None, 'hashtags': []}
{'text': "RT @exo_statistics: 'DON'T FIGHT THE FEELING (Expansion Ver.)' debuts at #1 on Ktown4u Daily Chart (5/17/21) with 20,105 copies sold!  fire \n\n—…", 'id': 1394327835330846724, 'Usr_loc': 'X-EXO world🌝', 'hashtags': []}
{'text': "@benavrim @DocGrawitch  hot_beverage ️ doughnut  Statue_of_Liberty  all of @TheDemocrats are so emotional they can't reimagine a box of chocolate like the… https://t.co/zOvSFtVdys", 'id': 1394327834965987329, 'Usr_loc': 'U-Tapao Thailand, 1973 ', 'hashtags': []}
{'text': '@lvjykyra I see all', 'id': 1394327835490226176, 'Usr_loc': None, 'hashtags': []}
{'text': '@maddyeisenberg @OttawaParamedic @ottawacity @pramaphone We’re glad to see so many friends and colleagues getting t… https://t.co/H2YKZt6LM4', 'id': 1394327835318292481, 'Usr_loc': 'Ottawa, Ontario', 'hashtags': []}
{'text': 'RT @EXOPublicity: 200$ for EXO ComeBack If we get 20k likes  fire   Can we do it as fast as possible?  thinking_face  We have only 20Days left from CB sneezing_face lets do…', 'id': 1394327835444236290, 'Usr_loc': None, 'hashtags': []}
{'text': 'RT @Farda_Alphonso: He got to do me first to show me he’s all business.', 'id': 1394327835402199042, 'Usr_loc': '?', 'hashtags': []}
{'text': 'RT @ULTRAGLOSS: how do u guys not daydream. i just b thinking all the time', 'id': 1394327835490258951, 'Usr_loc': None, 'hashtags': []}
{'text': 'RT @reeenns: They didn’t leave their pet fish y’all think they gonna leave their land', 'id': 1394327835439996930, 'Usr_loc': 'Toronto', 'hashtags': []}
{'text': 'RT @poonamkachandd: Ok. This gentleman is a teacher, he has lost his job and has two sick parents at home to care for, He really is in desp…', 'id': 1394327835473371137, 'Usr_loc': None, 'hashtags': []}
{'text': 'RT @lyndy1115: Good. All his BS should never be covered by the media again!! https://t.co/vq02fPeOyt', 'id': 1394327835456770055, 'Usr_loc': 'Stafford Springs CT  #Resist !', 'hashtags': []}
{'text': "We're supporting @MindCharity by auctioning of our very own Operations Director, Mike as labourer for the day at Sh… https://t.co/tn1NMiV7qd", 'id': 1394327834890485762, 'Usr_loc': 'Exeter, England', 'hashtags': []}
{'text': "People need to go to work. All this free shit isn't helping.  People really gotta get up &amp; go to work while ppl jus… https://t.co/UiQvjugHi4", 'id': 1394327835628744706, 'Usr_loc': 'Charlotte, NC', 'hashtags': []}
{'text': 'i would like to say that i fuckimg hate men in all their shapes and forms, i hope they go extinct  red_heart  thanks for coming to my ted talk', 'id': 1394327835783860227, 'Usr_loc': 'she/her | 20', 'hashtags': []}
{'text': 'I don’t have any orders due til Friday &amp; it feels so good lol I’m off all week u know why? CUZ I WORK FOR MEEEEEEE🥳🥳🥳🥳🥳🥳🥳🥳🥳🥳🥳', 'id': 1394327835771293696, 'Usr_loc': 'Ascending ', 'hashtags': []}
{'text': 'In Taunggyi, Shan State, junta thugs inspect all the bypassing vehicles in front of Hnin Lwin Lwin Photography shop… https://t.co/MqXhOUPoiV', 'id': 1394327835569909765, 'Usr_loc': 'Myanmar', 'hashtags': []}
{'text': 'RT @dorisolaitan_: A relationship where y\'all "fix it" together with respectable communication&gt;&gt;&gt;', 'id': 1394327835804848128, 'Usr_loc': ' 🌍', 'hashtags': []}
{'text': 'RT @eNEWrgy: Blue roses, penguin and raccoon are all asked by chanhee to be included in the nerdy love mv and the production team really pu…', 'id': 1394327835838345218, 'Usr_loc': None, 'hashtags': []}
{'text': 'RT @CaucasianJames: y’all mind if i have a good week', 'id': 1394327835913900034, 'Usr_loc': 'nc', 'hashtags': []}
{'text': 'All I was saying was I certainly hope that all of this effort to getting these diamonds is going to be worth it. Ma… https://t.co/WgSr97x80O', 'id': 1394327835830067203, 'Usr_loc': 'admin in following', 'hashtags': []}
{'text': "RT @falastineee48: don't you ever forget that palestinians have been screaming all of this for 73 years and the world chose to wait until n…", 'id': 1394327835947540483, 'Usr_loc': '🇹🇹', 'hashtags': []}
{'text': 'RT @street4ngel: how did yall use the wrong flags all you have to do is type the name lol https://t.co/9E7Y1TazZc', 'id': 1394327838287826947, 'Usr_loc': 'Kuching, Sarawak', 'hashtags': []}
{'text': 'shamna weirded me ouuutttttttt but her tiddies were all up in my face it was nice for a moment', 'id': 1394327838237544451, 'Usr_loc': '19. they / them.', 'hashtags': []}
{'text': 'I don’t buy the top is in, at all. So, what are you buying today? I added to $stmx $vgx and yep, $btc.', 'id': 1394327838296350720, 'Usr_loc': 'Hidden Leaf ', 'hashtags': []}
{'text': 'RT @khairul_hafidz: This is a very important message to all. Please follow this advice.', 'id': 1394327838317158401, 'Usr_loc': 'Unknown IP address', 'hashtags': []}
{'text': 'RT @answerswithjoe: New post (The Most Scientifically Accurate Movies Of All Time) has been published on Answers With Joe - https://t.co/s2…', 'id': 1394327838350667781, 'Usr_loc': 'Mars', 'hashtags': []}
{'text': '@Pepe_19i doesn’t rest man I swear this guy is on spaces all the time loudly_crying_face  loudly_crying_face  loudly_crying_face  loudly_crying_face ', 'id': 1394327838296248320, 'Usr_loc': None, 'hashtags': []}
{'text': 'RT @NoraSbunny: 3 times bigger than my white boyfriend that I need 2 hands to cover it all the way  rabbit_face  https://t.co/Ic1mCYDPLA', 'id': 1394327838233440266, 'Usr_loc': None, 'hashtags': []}
{'text': "@SlackHQ @wirecutter Lol. Slack is compromised beyond all belief. Don't use it if you value security.", 'id': 1394327838476562445, 'Usr_loc': None, 'hashtags': []}
{'text': 'RT @RepMontague: @2crazywokeasian @stillgray @MrAndyNgo @RealMattCouch @leadpastor Weren’t you there? Diversity was definitely at the confe…', 'id': 1394327838388490240, 'Usr_loc': None, 'hashtags': []}
{'text': 'RT @dorisolaitan_: A relationship where y\'all "fix it" together with respectable communication&gt;&gt;&gt;', 'id': 1394327838447357952, 'Usr_loc': None, 'hashtags': []}
{'text': 'RT @tomgara: Extraordinary photo from Gaza on the front page of The Guardian today - six year old Suzy Eshkuntana pulled alive from the rub…', 'id': 1394327838497640454, 'Usr_loc': None, 'hashtags': []}
{'text': 'RT @mikepompeo: The CCP and some liberals in Congress like @BernieSanders, @AOC &amp; @IlhanMN are siding with Hamas terrorists and against Ame…', 'id': 1394327838472474625, 'Usr_loc': None, 'hashtags': []}
{'text': "RT @parkerrsimmons: All these ppl who couldn't stand being told to wear a mask sure can't wait to tell a pregnant person what to do.", 'id': 1394327838623424512, 'Usr_loc': 'My House', 'hashtags': []}
{'text': 'RT @waymoflydenuu: The funniest part is he be having proof lmao', 'id': 1394327838489255936, 'Usr_loc': '864', 'hashtags': []}
{'text': 'RT @august__miracle: Becoming a fan of Tiffany Young has been the best decision I’ve ever made. No regrets at all. I love you🤍 @tiffanyyoun…', 'id': 1394327838560456705, 'Usr_loc': 'ÜT: 51.4782492,-0.1981771', 'hashtags': []}
{'text': 'RT @misanthropicc92: Someone once said Twitter is the sociology seminar where no one has done the reading but everyone is speaking. I think…', 'id': 1394327838686334980, 'Usr_loc': 'Wisconsin', 'hashtags': []}
{'text': 'RT @HlebbyKe: Why are you yelling?  skull ', 'id': 1394327838547972097, 'Usr_loc': 'Wherever The Wind Blows', 'hashtags': []}
{'text': 'RT @AFCWajday: Let me tell you of a little war crime tactic that “israel” used in Lebanon:\n\n“israel” dropped thousands of cluster bombs dur…', 'id': 1394327838648586247, 'Usr_loc': '♡ ♑ SUN, ♐ MOON & ♋ RISING ♡', 'hashtags': []}
{'text': 'RT @dubsndoo: It’s far more terrifying that a snowboard instructor who groped a reporter, has zero experience in the business world, and wo…', 'id': 1394327838652784642, 'Usr_loc': None, 'hashtags': []}
{'text': 'i was only able to find 12 so far, if you know anymore please reply! it can also be influencers or devs!', 'id': 1394327838766084101, 'Usr_loc': 'Showering ', 'hashtags': []}
{'text': "RT @StpeterPadilla: @GregAbbott_TX @ScottAdamsSays We'd probably do better witbout all those disgusting, filthy Californians coming over. #…", 'id': 1394327838740914179, 'Usr_loc': None, 'hashtags': []}
{'text': 'RT @MarinaNigrelli: TOP TIP:\n\nWhen a Tory minister says, “The public aren’t interested in…”\n\nIt’s something we should all be acutely intere…', 'id': 1394327838854164484, 'Usr_loc': None, 'hashtags': []}
{'text': 'RT @ZukisanNdwendwe: It looks like all South African black owned Barbar Shops and Salons died in Kasi.  face_with_head-bandage \n\nWe need to have a conversation ab…', 'id': 1394327838791196674, 'Usr_loc': None, 'hashtags': []}
{'text': 'how  old  do  y’all  think  i  am', 'id': 1394327838887579657, 'Usr_loc': ' ᡕᠵ᠊ᡃ່࡚ࠢ࠘ ⸝່ࠡࠣ᠊߯᠆ࠣ࠘ᡁࠣ࠘᠊᠊ࠢ࠘𐡏~♡', 'hashtags': []}
{'text': 'RT @palevant: Israelis can’t handle their terrorist state being exposed all over the media. It won’t end here.', 'id': 1394327838732406784, 'Usr_loc': 'Australia', 'hashtags': []}
{'text': 'he deserves all the love in the world', 'id': 1394327838745108483, 'Usr_loc': 'JIM♡', 'hashtags': []}
{'text': 'RT @rohanrgupta: I pray for the safety and well being of all the people from the states on our western coast - Kerala, Karnataka, Goa, Maha…', 'id': 1394327838866567169, 'Usr_loc': 'भागलपुर, भारत', 'hashtags': []}
{'text': 'Also random note no offense but fancam pinneds all look terrible and make me dizzy from visual noise and I wish they would stop.', 'id': 1394327838996811777, 'Usr_loc': None, 'hashtags': []}
{'text': '@theErinPaige Good luck, my boss is a covid denier and almost everyday for the past year we get a 10 minute lecture… https://t.co/CpFqzrd38a', 'id': 1394327838820556802, 'Usr_loc': 'Llanidloes, Wales', 'hashtags': []}
{'text': "RT @SFAA99409530: @esaoperations Submission send - 'Torricelli Solaris' - just check his wiki (without 'Solaris'), it just makes all the se…", 'id': 1394327839009251331, 'Usr_loc': 'W. Canada (male) No...dms', 'hashtags': []}
{'text': 'RT @tomgara: Extraordinary photo from Gaza on the front page of The Guardian today - six year old Suzy Eshkuntana pulled alive from the rub…', 'id': 1394327838963159041, 'Usr_loc': None, 'hashtags': []}
{'text': "@JstLrkvng__ I'm glad she realised what's her place in this world. She just want to be used until usable. Thats all… https://t.co/TxwZvqX8ZO", 'id': 1394327838933733378, 'Usr_loc': 'Irrelevant', 'hashtags': []}
{'text': 'Lol I’m sorry but if my friend got hit by a guy I’m sure as hell throwing hands  clapping_hands  medium-light_skin_tone  but deadass !!!!', 'id': 1394327838933745667, 'Usr_loc': 'Avondale, AZ', 'hashtags': []}
{'text': '@benjaid4u Hello @benjaid4u, apologies for the delayed response. Please state the exact network issue being experie… https://t.co/wSxauVj9XX', 'id': 1394327838967451648, 'Usr_loc': 'Nigeria', 'hashtags': []}
{'text': "RT @BesuraTaansane: Maaaan .....nature's fury has no parallel !\n\nNever ever seen Gateway of India like this in all these years  face_screaming_in_fear \n\n#CycloneT…", 'id': 1394327839134998529, 'Usr_loc': 'Hyderabad, India', 'hashtags': []}
{'text': 'RT @ScottZILWarrior: I will send one random person $350 in 24hrs all you have to do is RT and be following myself and @FootballStarsIO\n\nAdd…', 'id': 1394327839105638403, 'Usr_loc': '🇵🇭', 'hashtags': []}
{'text': 'RT @STALKINKS: they drink in their dominant’s words, tone so seductive it has the submissive even more eager to please them. stretching the…', 'id': 1394327839336407041, 'Usr_loc': 'Add only if you accept +18.', 'hashtags': []}
{'text': 'RT @rjraunac: More power to you Gauti bhai  flexed_biceps  light_skin_tone  clapping_hands  light_skin_tone ', 'id': 1394327839219060738, 'Usr_loc': 'New Delhi, India ', 'hashtags': []}
{'text': '@dogdaysinitaly Some total moron stole ours and our pals tweets !!! Not retweets !! Copies so they could base their… https://t.co/Chbo5Wkczm', 'id': 1394327839307177986, 'Usr_loc': 'Essex . England ', 'hashtags': []}
{'text': "I'll pay someone to write an essay on the topic of Gather 'round ye lads and lasses, set ye for a while And harken… https://t.co/ATBd8WKKk3", 'id': 1394327839386738693, 'Usr_loc': None, 'hashtags': []}
{'text': "RT @kezia_noble: A few weeks ago the media was obsessed with 'wave' in Brazil. Suddenly, it all stopped. Nobody thought this was a little s…", 'id': 1394327839386779651, 'Usr_loc': None, 'hashtags': []}
{'text': 'RT @dcrklinq: THE CLENCH OF HIS JAW yes im not fine at all https://t.co/DIoJBDziw1', 'id': 1394327839432974341, 'Usr_loc': 'she/her | 20', 'hashtags': []}
{'text': 'RT @RangersFACTS: A line has been crossed today by @conorrPA &amp; by association @pasport \n\nThat the tweet had been deleted says it all, hopef…', 'id': 1394327839520985093, 'Usr_loc': None, 'hashtags': []}
{'text': 'RT @Christi75367510: Thank God for people like Dolores Cahill, Mike Yeadon etc etc..  smiling_face_with_smiling_eyes  smiling_face_with_smiling_eyes ', 'id': 1394327839432916993, 'Usr_loc': None, 'hashtags': []}
{'text': 'RT @PTIofficial: After the parliamentary session Foreign Minister @SMQureshiPTI will be leaving for Turkey where he will meet Turkish, Suda…', 'id': 1394327839537762305, 'Usr_loc': 'Islamabad', 'hashtags': []}
{'text': 'Hey, just a reminder that my states min wage is a gigantic $7.25. You can carry 80lb shingle bundles up ladders all… https://t.co/0MxlkE4B3T', 'id': 1394327842465386496, 'Usr_loc': 'At my house, man. ', 'hashtags': []}
{'text': 'RT @Tyler_Yalch: The $AMC community is legit the most amazing community I’ve ever been a part of. This movement is only going to get strong…', 'id': 1394327842360643588, 'Usr_loc': 'Alabama, USA', 'hashtags': []}
{'text': '@Fims75 I’m all for it! As long as I can be involved!  face_with_tears_of_joy  I’ll make the teas', 'id': 1394327842599620613, 'Usr_loc': 'Ipswich, England', 'hashtags': []}
{'text': 'RT @aspxn75: since i have a lot of traction rn i wanna link my gfm bc i’m trying to get out of my increasingly abusive house. I’m trying my…', 'id': 1394327842520018952, 'Usr_loc': 'he/him, 22 + read carrd', 'hashtags': []}
{'text': 'RT @thepotatopages: We could all use a boost of happiness these days!  heart_suit ️\n\nI made a bunch of happiness spell jars to help out! 🥰 At $8 &amp; fre…', 'id': 1394327842616451076, 'Usr_loc': 'Ames, IA', 'hashtags': []}
{'text': 'RT @jack_baileyxxx: i shot a fat load all over my face  face_with_open_mouth  @RyanSummerXXX \n\nfull fuck vids here: https://t.co/6h5CtSepXG https://t.co/PD3lyTQ…', 'id': 1394327842641559556, 'Usr_loc': None, 'hashtags': []}
{'text': '@Daisyz_Daughter Yeah it’s too hot to have all the hair around me on a regular basis I always spray lol', 'id': 1394327842671013890, 'Usr_loc': None, 'hashtags': []}
{'text': 'I froze when I watched this. I didn’t expect that at all! What a useless idiot, even with this being on tv see how… https://t.co/s2f7AXfR5m', 'id': 1394327842616451072, 'Usr_loc': 'Abuja', 'hashtags': []}
{'text': '@Mnny_Tz Green Hill zone of all things loudly_crying_face  loudly_crying_face  https://t.co/yuPXGmr05q', 'id': 1394327841207115778, 'Usr_loc': 'Tottenham, London', 'hashtags': []}
{'text': 'RT @MsRoyalY: Y’all Grey still saying thank you and he be eating good af https://t.co/CBhJ2omDfF', 'id': 1394327842859716612, 'Usr_loc': 'Toledo, OH', 'hashtags': []}
{'text': 'RT @THEACTAVISJ: If u ain’t got no money in yo pocket\nThen u don’t need to b out here partying , tryna kick it , chasing no bitch , tryna s…', 'id': 1394327842918256640, 'Usr_loc': 'Los Angeles, CA', 'hashtags': []}
{'text': 'RT @DKShivakumar: Nearly 10,000 people have died of Covid second wave in Karnataka. My deepest condolences to all those who have a loved on…', 'id': 1394327842888962061, 'Usr_loc': 'Karnataka, India', 'hashtags': []}
{'text': "one takeaway i have from this is that i'd completely forgotten how boring men's fashion is", 'id': 1394327842805125124, 'Usr_loc': 'brooklyn | she/her/hers', 'hashtags': []}
{'text': "RT @PurpleGeth: In all the (understandable) hype over Castlevania episode 9, this scene from the end of the previous episode won't get the…", 'id': 1394327842993819651, 'Usr_loc': None, 'hashtags': []}
{'text': "RT @guelphmuseums: A conversation we all have a role in  speech_balloon  This Wednesday we're live with another History Bites. Join us as we chat about th…", 'id': 1394327843174236160, 'Usr_loc': 'Guelph, Ontario', 'hashtags': []}
{'text': 'RT @assampolice: In partial modification of the Orders dated May 4, 2021 and May 13, 2021, all inter-district transport services and moveme…', 'id': 1394327843232833536, 'Usr_loc': 'Assam, India', 'hashtags': []}
{'text': '@WoodReporting @Milhouse_Van_Ho @CPHO_Canada CCP plant, WHO employee and all-round heinous human oozing puss and bi… https://t.co/0ERWGX5xMn', 'id': 1394327843237154818, 'Usr_loc': None, 'hashtags': []}
{'text': 'RT @hunters: y’all rlly don’t need to hear it from me, but in case u do: forever/always fuck police states, fuck settler colonialism, and f…', 'id': 1394327843375570948, 'Usr_loc': 'she/they(بالعربي هي/هو)', 'hashtags': []}
{'text': 'I wonder how Mazi cope with all these unrelated comments to his posts every time. Make una give this man some breat… https://t.co/DnKYLSjxF3', 'id': 1394327843195301891, 'Usr_loc': 'Lagos, Nigeria ', 'hashtags': []}
{'text': 'RT @kaushikcbasu: Almost all Indians, certainly all who care for the country, are waiting for 2024 the way Indians once waited for 1947.', 'id': 1394327843425853447, 'Usr_loc': None, 'hashtags': []}
{'text': 'RT @natashagideon: Side track sikit but please normalise not kissing babies AT ALL. You have no idea what penyakit you have. I am still tra…', 'id': 1394327843371245572, 'Usr_loc': 'Malaysia', 'hashtags': []}
{'text': 'RT @mcuban: Things to know about all markets.  Buying on Margin giveth, Margin Calls taketh away even more, faster.  Rumors giveth. News ta…', 'id': 1394327843455344644, 'Usr_loc': None, 'hashtags': []}
{'text': 'RT @noname:  thinking_face  zionists using the exact same language as white supremacists colonizers. in order to justify the violent removal of indigenou…', 'id': 1394327843442728966, 'Usr_loc': None, 'hashtags': []}
{'text': "@LinBrehmer My favorite rock band of all time, and I love Keef, of course, but don't forget, Woody Guthries guitar… https://t.co/hXWaNT3hZr", 'id': 1394327843560169476, 'Usr_loc': None, 'hashtags': []}
{'text': 'RT @SAbdeshahian: y’all think palestine is complicated but know everything about the marvel cinematic universe  loudly_crying_face  loudly_crying_face  loudly_crying_face ', 'id': 1394327843442765825, 'Usr_loc': None, 'hashtags': []}
{'text': '@Andi51377578 This all sounds eerily similar to the Imperium of Man.\nAnd that precisely is the reason most… https://t.co/Ri8cfp7A6Z', 'id': 1394327843698528258, 'Usr_loc': None, 'hashtags': []}
{'text': 'RT @iamsrk: Happy Dussehra to all... wishing you success, health and happiness on this special day as we celebrate the triumph of good over…', 'id': 1394327844042412035, 'Usr_loc': None, 'hashtags': []}
{'text': 'RT @TKseoulshop: FREE UNSEALED CARNIVAL ALBUM\n\n money_bag 150 PHP \n\n pushpin DOP : 3DAYS\n pushpin ETA : NORMAL\n pushpin CAN CHOOSE VERSION\n pushpin ALL VERSION AVAIL\n pushpin 5 SLOTS PER VE…', 'id': 1394327844050800644, 'Usr_loc': 'sa imo hart', 'hashtags': []}
{'text': "RT @anu2181: We all got both light and dark inside us..\nWhat matters is the part we choose to act on that's who we really are.....!!\n#black…", 'id': 1394327844042412033, 'Usr_loc': 'Nowhere', 'hashtags': []}
{'text': 'Most if not All art is used by wyerframez\n\nLayout by: @GIRLIXSTBXTCHER', 'id': 1394327844105379842, 'Usr_loc': 'The Doghouse...', 'hashtags': []}
{'text': "yet some of y'all are still sleeping on fear. i don't get y'all.", 'id': 1394327844126265345, 'Usr_loc': None, 'hashtags': []}
{'text': 'RT @thedellwelsh: Y6 enjoyed their Welsh lesson with @MrW_Cymraeg from @chepstowschool this morning. Fabulous ideas, speaking and writing b…', 'id': 1394327844096991232, 'Usr_loc': None, 'hashtags': []}
{'text': 'RT @tweetsbymanii: Tomorrow my mother rings the bell, she is officially done with chemo🥺.. My mother beat cancer y’all!', 'id': 1394327844155703296, 'Usr_loc': '504✈️430', 'hashtags': []}
{'text': '|. Replies coming today on all of my accounts hopefully  relieved_face  \n\nLast week got to be a bit of a busy one. My apologies.', 'id': 1394327844248035329, 'Usr_loc': '; 𝑀𝑖𝑙𝑙𝑒𝑛𝑛𝑖𝑢𝑚', 'hashtags': []}
{'text': 'RT @edmthotiana: y’all do not test the shit you take for festivals and get excited when you find a random baggy full of god only knows what…', 'id': 1394327844365373441, 'Usr_loc': 'gonzales', 'hashtags': []}
{'text': '@DograTishaa All vegetarians will bless you tonight! We are already "poached" due to Roj Khao Ande advertisement.', 'id': 1394327844336005121, 'Usr_loc': 'Bharat', 'hashtags': []}
{'text': 'RT @natashagideon: Side track sikit but please normalise not kissing babies AT ALL. You have no idea what penyakit you have. I am still tra…', 'id': 1394327844210151432, 'Usr_loc': None, 'hashtags': []}
{'text': 'RT @skinnygifxx: Me masturbo hasta soltar toda la leche // I masturbate until I let go of all the milk… https://t.co/A1zcmHHEcc https://t.c…', 'id': 1394327844352757762, 'Usr_loc': None, 'hashtags': []}
{'text': 'RT @nxiima: Dubai is cancelled. This city lights up the burj al Khalifa for anything... it makes sense now why they haven’t done so yet.', 'id': 1394327844226965505, 'Usr_loc': 'Malaysia', 'hashtags': []}
{'text': 'RT @farrahrized: Nothing like realizing all ur memories are melting away 🤩 I only have like 12 left', 'id': 1394327844575227904, 'Usr_loc': None, 'hashtags': []}
{'text': 'RT @Abhishe50965999: Sushant loves you all SSRians  red_heart \n\nTRUTH CAN BE HARASSED NOT DEFEATED.\n\nFight For Truth!     Fight For Justice!!\n\nSSR He…', 'id': 1394327844583448576, 'Usr_loc': 'Disneyland💫', 'hashtags': []}
{'text': "RT @Chican3ry: The reason they all use Wix for a host is the same reason white supremacists use @Wix for a host.\n\nIt's a place hate goes fo…", 'id': 1394327844453502980, 'Usr_loc': 'Lake District, Great Britain', 'hashtags': []}
{'text': "RT @exo_statistics: 'DON'T FIGHT THE FEELING' has now surpassed 108 THOUSAND (108,000) pre-orders on Ktown4u alone!\n\nPB 1 - 43,576\nPB 2 - 3…", 'id': 1394327844625342464, 'Usr_loc': 'ayo ngepet, lu jdi babi nya', 'hashtags': []}
{'text': '"It\'s for your safety, Bαekhyun." \n\nThat\'s all Chαnyeol can say, Bαekhyun still doesn\'t accept Chαnyeol\'s excuse ev… https://t.co/0E6wYg6w9O', 'id': 1394327844642197509, 'Usr_loc': '찬백 married. 20s/they/them', 'hashtags': []}
{'text': '@tnikkole_ that happened to me a couple times loudly_crying_face  loudly_crying_face  yelled the number and all like sir i can’t even hear you with this wind', 'id': 1394327846714216451, 'Usr_loc': None, 'hashtags': []}
{'text': 'RT @redsteeze: How did it become polarized? Was it outlets like Wash Post &amp; NY Times labeling it a conspiracy theory without looking into i…', 'id': 1394327846638784512, 'Usr_loc': None, 'hashtags': []}
{'text': 'RT @iamlaurenp: This has slain me all day. \n\nDogs are just the best. https://t.co/Tx3PgnqvaH', 'id': 1394327846835871760, 'Usr_loc': 'Washington, DC', 'hashtags': []}
{'text': '@CarolHakios @BreesAnna Yeadon’s credentials are massively oversold, he was vice president &amp; chief scientist in a s… https://t.co/4D3BRieH7S', 'id': 1394327846739447810, 'Usr_loc': None, 'hashtags': []}
{'text': 'Translated: \nTranslation results\nHere are some images to calm the hearts of all those who think that Sankung Jawara… https://t.co/9MVaVOH06B', 'id': 1394327846777147396, 'Usr_loc': None, 'hashtags': []}
{'text': 'Need', 'id': 1394327846919806982, 'Usr_loc': 'Fuenlabrada, Madrid', 'hashtags': []}
{'text': 'RT @RepMondaire: On this International Day Against Homophobia, Transphobia, and Biphobia, we recommit to fighting hate in all its forms.\n\nN…', 'id': 1394327847066537986, 'Usr_loc': None, 'hashtags': []}
{'text': 'RT @yanikior: that nonchalant shit is dead. i’m way too sensitive for all that. a nigga gotta show me in every way that he cares or i’m gone', 'id': 1394327847032983553, 'Usr_loc': 'Hampton, GA', 'hashtags': []}
{'text': "RT @TradesTrey: I'm lookin' at you shitadel, and so is Mark Cuban", 'id': 1394327847100112901, 'Usr_loc': None, 'hashtags': []}
{'text': 'Charging the entire fee including the annual charges for just 1 hour online class for KG students ( who need consta… https://t.co/fJoTopo8HF', 'id': 1394327846940680198, 'Usr_loc': None, 'hashtags': []}
{'text': '@Alvadis_Tveburg Point taken, however, ALL of us, particularly Westerners are conditioned to believe in lies; Ameri… https://t.co/dSVKW4CIMs', 'id': 1394327847091716096, 'Usr_loc': 'General', 'hashtags': []}
{'text': "i understand that i've done something unforgivable. but you know, but you know! to transcend all that is truly... ...what love is all about!", 'id': 1394327847221796865, 'Usr_loc': "owner's prns are he/she/they", 'hashtags': []}
{'text': '@The_Objective_1 @Delta49erx He also buttering up curry. He did so at all star break too, with those reports he try… https://t.co/9tLaAgry9F', 'id': 1394327847116808203, 'Usr_loc': 'Sacramento, CA', 'hashtags': []}
{'text': 'RT @blessadj: Bro. After all these years I was just clicking for luck https://t.co/lBf0Y7dVHZ', 'id': 1394327847238578177, 'Usr_loc': 'InMyBag😈💯', 'hashtags': []}
{'text': 'RT @bmtotw: Cause everybody in everybody else’s business', 'id': 1394327847251202052, 'Usr_loc': '420 🦍💨', 'hashtags': []}
{'text': 'RT @KMbappeTeam: Kylian Mbappé has scored tonight:\n\nHis 130th goal in a PSG shirt.\nHis 26th League goal this season.\nHis 40th goal in all c…', 'id': 1394327847309819904, 'Usr_loc': None, 'hashtags': []}
{'text': 'In Taunggyi, Shan State, junta thugs inspect all the bypassing vehicles in front of Hnin Lwin Lwin Photography shop… https://t.co/LMv1lFqkJ4', 'id': 1394327847154589697, 'Usr_loc': None, 'hashtags': []}
{'text': 'like they really think we’re stupid  loudly_crying_face  loudly_crying_face  loudly_crying_face  we have all the evidence', 'id': 1394327847410429953, 'Usr_loc': 'Kuching, Sarawak', 'hashtags': []}
{'text': 'To: Mr. "Looked me in the eye and told me you would never go away"\n\nFrom: Miss "I\'ve been waitin\' for you all my li… https://t.co/fzj41GErMw', 'id': 1394327846563180545, 'Usr_loc': None, 'hashtags': []}
{'text': 'RT @rebelleflowerr_: I can’t wait to be married &amp; be ducked off with my husband &amp; never talk to y’all ever again', 'id': 1394327847406379019, 'Usr_loc': 'the M if you looking', 'hashtags': []}
{'text': "RT @ateez_pop: Idk if y'all realize this, but so far ateez hv won the expert evaluation twice already, but they drop down every time bc of…", 'id': 1394327847464968201, 'Usr_loc': '23 | she/her', 'hashtags': []}
{'text': 'Sometimes. the wrongs that were done against you. haunt you for the rest of your life. not all that is generally ac… https://t.co/U8gbVsDEUE', 'id': 1394327847406211075, 'Usr_loc': None, 'hashtags': []}
{'text': 'If you think miracles can’t happen, my mother, who for a long while denigrated bisexuality because she ‘didn’t get… https://t.co/Frhj8UCSaU', 'id': 1394327847372722178, 'Usr_loc': 'Philadelphia, PA', 'hashtags': []}
{'text': '@JedediahBila So glad Carley was on this weekend. They all got along well together.', 'id': 1394327847460872206, 'Usr_loc': 'United States', 'hashtags': []}
{'text': "RT @ScruffymuscleLA: A new JFF superfan is enjoying my 59 videos, 71 posts, 23 photos, and 519 likes. Here's a sneak peek. See ALL my conte…", 'id': 1394327847573999621, 'Usr_loc': None, 'hashtags': []}
{'text': 'Y’all said HER put crack in damage and I’m just here to confirm', 'id': 1394327847586648065, 'Usr_loc': '954 ', 'hashtags': []}
{'text': '@gopleader MoCs should meet reasonable expectations for professional behavior. Rep Greene routinely fails this expe… https://t.co/xmgdvOXmMy', 'id': 1394327847532212228, 'Usr_loc': 'Cumming, GA', 'hashtags': []}
{'text': 'RT @alfietempleman: what a couple of amazing weeks it’s been. thank u all so much for streaming forever isn’t long enough!  yellow_heart  yellow_heart  yellow_heart   now go have…', 'id': 1394327847704092677, 'Usr_loc': 'Chile || she/they', 'hashtags': []}
{'text': "heeseung's face says it all smiling_face_with_open_mouth_&_smiling_eyes  smiling_face_with_open_mouth_&_smiling_eyes \n https://t.co/qRDQ6T2RVr", 'id': 1394327847737700352, 'Usr_loc': "hee's heart♡ | she/her", 'hashtags': []}
{'text': 'RT @GreenercleanerB: Thank you to everyone walking to school rather than driving! And to all the locals helping them feel safe doing it :)…', 'id': 1394327847855136770, 'Usr_loc': 'London', 'hashtags': []}
{'text': "RT @Worville: I don't know who needs to hear this, but David Luiz hasn't been dribbled past all season and only VVD in 18/19 shares the sam…", 'id': 1394327848098353152, 'Usr_loc': None, 'hashtags': []}
{'text': '@RedChessQueen99 Watched Operation Varsity Blues doc a few days ago. I’m sorry to all of you who wasted your $ on I… https://t.co/TBRfJxKaYJ', 'id': 1394327847926484995, 'Usr_loc': 'Las Vegas, NV', 'hashtags': []}
{'text': 'RT @theIovedcIub: A teacher was expelled from school for sympathizing with Israel in Kuwait. We need this all over the globe, people need t…', 'id': 1394327848165560320, 'Usr_loc': 'loona jennie iu rv(ot4)', 'hashtags': []}
{'text': 'Heading up to MA the week after they lift the mask mandate. It’s gonna be weird to not have to wear a mask for the… https://t.co/JC6Da51Yao', 'id': 1394327848060653572, 'Usr_loc': None, 'hashtags': []}
{'text': "@bbseul @ivorianbabex all i ever seen is frogs and lizards  crying_face  but i'll look more intently now", 'id': 1394327848224178177, 'Usr_loc': "24/INFJ/4W3/O-/♑︎♌︎♎︎/操/6'1", 'hashtags': []}
{'text': 'RT @madeline_will: “We decimated the Black principal and teacher pipeline, and we’ve never rectified that. .... It is the unfinished promis…', 'id': 1394327848220086275, 'Usr_loc': 'New York, NY', 'hashtags': []}
{'text': 'RT @Tacosndgrenades: So y’all ready to start talking? Trusting? Getting some help? Asking for it? Ready to be vulnerable? https://t.co/x8Ce…', 'id': 1394327848152932355, 'Usr_loc': 'Baltimore, MD', 'hashtags': []}
{'text': '@laurenboebert @Bethvanduyne They all need to take it off and pay the fines if necessary', 'id': 1394327848249438212, 'Usr_loc': 'United States', 'hashtags': []}
{'text': 'STRIKE FOR PALESTINE !', 'id': 1394327848140296202, 'Usr_loc': None, 'hashtags': []}
{'text': '@ThatScottFord Hi Scott! Thanks for your interest, you can check out all of the developments here on our website https://t.co/jaoOIxCMKN', 'id': 1394327848056500226, 'Usr_loc': 'The Flats in Cleveland', 'hashtags': []}
{'text': "RT @escherbug: All my cat wants is to be one of those Jun's Kitchen cats that gets to sniff everything you're working with and eat the thin…", 'id': 1394327848320647182, 'Usr_loc': 'space', 'hashtags': []}
{'text': 'RT @mcuban: Things to know about all markets.  Buying on Margin giveth, Margin Calls taketh away even more, faster.  Rumors giveth. News ta…', 'id': 1394327848370987009, 'Usr_loc': None, 'hashtags': []}
{'text': 'We did it lads https://t.co/GtMsbkjUrj', 'id': 1394327846919688193, 'Usr_loc': 'Brighton, England', 'hashtags': []}
{'text': 'RT @Black1970Gary: “A Goldcrest weighs the same as a 20p! - if you love him pop a wee emoji on!”  smiling_face_with_smiling_eyes 🤎🤍 green_heart \n  All Photos Support @welfare_one \n\n@…', 'id': 1394327848375267334, 'Usr_loc': None, 'hashtags': []}
{'text': '@nocontxtsonic This is from Sonic X episode 52: A New Start. All of Sonic’s friends return to their home world. Rou… https://t.co/Eqsfyqhr5A', 'id': 1394327848295481345, 'Usr_loc': 'Moebius', 'hashtags': []}
{'text': "RT @mntozakisana29: Since some of y'all loves to underestimate and discredit 사나  @JYPETWICE https://t.co/wCarBTBgI0", 'id': 1394327848379367435, 'Usr_loc': '🇬🇪', 'hashtags': []}
{'text': '@elsabilgi @JowairiaMoein @BigNemo21 how do you see videos of children dying and being beaten and think “hmmm.. it’… https://t.co/V8Dz1ob9kv', 'id': 1394327848287182858, 'Usr_loc': None, 'hashtags': []}
{'text': 'RT @tntjncnews: We sent a message to  the Palestinian people: In your struggle for freedom, you will never be alone. Humanity people all ti…', 'id': 1394327850874855425, 'Usr_loc': None, 'hashtags': []}
{'text': 'look im buying all but why tf is there 1 pc pledis capitalism im so heartbroken', 'id': 1394327850828898311, 'Usr_loc': None, 'hashtags': []}
{'text': 'We sent a message to  the Palestinian people: In your struggle for freedom, you will never be alone. Humanity peopl… https://t.co/elDzYpOlbq', 'id': 1394327851021717509, 'Usr_loc': None, 'hashtags': []}
{'text': '@Sarcasm_TruDat @adayjacleopatra I designed this shooting game by myself. I hope you like it. https://t.co/tzPMJPGhcu', 'id': 1394327850895958016, 'Usr_loc': None, 'hashtags': []}
{'text': 'thank you', 'id': 1394327850942177285, 'Usr_loc': '16 : gbmi 14 : she/her : I post and interact with thinspo + meanspo + fatspo + sweetspo ', 'hashtags': []}
{'text': "RT @kmsnluv: normalize following back all the people that followed you if you are FINDING MOOTS, please don't act like a celebrity bestie pensive_face  raised_hand  light_skin_tone ", 'id': 1394327850950434816, 'Usr_loc': None, 'hashtags': []}
{'text': '@thehill Pro-life = save the fetus, but kill any and all criminals.', 'id': 1394327851038613507, 'Usr_loc': 'Earth ', 'hashtags': []}
{'text': 'RT @Ratnesh708: Achieving a Job is a part of "Representation"\nBut the EVM Government has already snatched the constitutional rights from th…', 'id': 1394327851126591488, 'Usr_loc': 'VISAKHAPATNAM', 'hashtags': []}
{'text': 'RT @___jhons: Make sure you clean your hands regularly, wear a mask and avoid crowds at all costs. Incase of any corona related symptoms re…', 'id': 1394327851021836290, 'Usr_loc': None, 'hashtags': []}
{'text': 'Choosing happiness despite all of the absolute bullshit is one of the simplest yet wildly impactful concepts of thi… https://t.co/h5dHXpYwuF', 'id': 1394327851084783616, 'Usr_loc': None, 'hashtags': []}
{'text': 'Ari wanting to see mac all wound up be needs to calm the f down and tane and zig trying to get him to go and Mia li… https://t.co/fandLgjGLN', 'id': 1394327851181166595, 'Usr_loc': 'in the tardis with the dr ', 'hashtags': []}
{'text': 'RT @Farah_Gazan: Nonstop heavy airstrikes since yesterday, all around Gaza, on the streets and infrastructure, citizens houses, cars, peopl…', 'id': 1394327851361521666, 'Usr_loc': None, 'hashtags': []}
{'text': 'RT @funder: @GOPLeader Doing a propaganda video proves this was just a photo op. Also, your refusal to meet with Officer Fanone is all the…', 'id': 1394327851311194112, 'Usr_loc': 'Illinois', 'hashtags': []}
{'text': '@cannibalcommune kasdnsfsdf i was watching the love me video the other day and all i could think was "wow fitzjames would body this"', 'id': 1394327851323777025, 'Usr_loc': 'languishing on half-pay', 'hashtags': []}
{'text': "RT @Gss_Views: Congis &amp; JCLs after seeing this backhand_index_pointing_down \n\n'All is well, All is well' https://t.co/NrzAxYIhbI", 'id': 1394327851311194115, 'Usr_loc': 'rooh-e-watan', 'hashtags': []}
{'text': 'RT @mehdirhasan: "All of these deaths are tragic. But the disparity in numbers really shouldn\'t surprise us. 1 side is the occupier, &amp; the…', 'id': 1394327851466477571, 'Usr_loc': None, 'hashtags': []}
{'text': 'Taemin bae pls put all about you on this album  loudly_crying_face ', 'id': 1394327851378298882, 'Usr_loc': 'h^^py // 20 // she/her 킹탄소년단 ', 'hashtags': []}
{'text': 'RT @RAOANKI85509608: Good morning  sunrise_over_mountains  sunrise_over_mountains  sunrise_over_mountains  all friends\nJai shree radhe krishna\nJai shree ram https://t.co/HDjF2coz88', 'id': 1394327851504050182, 'Usr_loc': None, 'hashtags': []}
{'text': "RT @DavidHirsh: ...For Ireland it's a way to continue familiar green/orange fighting; for Arab nationalism it was about diverting attention…", 'id': 1394327851592204291, 'Usr_loc': 'Barnet, London.', 'hashtags': []}
{'text': 'RT @tomgara: Extraordinary photo from Gaza on the front page of The Guardian today - six year old Suzy Eshkuntana pulled alive from the rub…', 'id': 1394327851638394880, 'Usr_loc': "No man's land", 'hashtags': []}
{'text': 'When you give out your number on a friday you know your drunk, but when you give the wrong digits because you can’t… https://t.co/XUek5EitzB', 'id': 1394327851638431746, 'Usr_loc': 'Porth, Wales', 'hashtags': []}
{'text': "@roscal_nyc @TradesTrey I'm all about taking these f**kers down, but this isn't it bro. Hedge Fund managers and bro… https://t.co/2CGJXl91aW", 'id': 1394327851554377739, 'Usr_loc': 'California, USA', 'hashtags': []}
{'text': 'Fast gain!!! \nRetweet and drop handles  OK_hand  OK_hand follow all who likes this tweet cherries  cherries ', 'id': 1394327851860697088, 'Usr_loc': 'Port Harcourt', 'hashtags': []}
{'text': 'RT @Tyson_Fury: “massive announcement” FURY VS JOSHUA IS ON AUGUST 14 in The kingdom of Saudi Arabia. The worlds biggest sporting event all…', 'id': 1394327851910893571, 'Usr_loc': None, 'hashtags': []}
{'text': "@agentfiftyseven @ajmarquis @such_hockey_wow @redditships I didn't mean to imply it was...corporations, if they wee… https://t.co/jSSn0oCArO", 'id': 1394327851894132736, 'Usr_loc': 'Scottsdale, AZ', 'hashtags': []}
{'text': 'All that flexing &amp; still live w/ your parents  thinking_face ', 'id': 1394327852061904901, 'Usr_loc': 'VALLEJO, CA  ', 'hashtags': []}
{'text': 'RT @JuliusGoat: Such a weird formulation: to acknowledge what’s happening is needed and right, but too much and too fast? When has any gove…', 'id': 1394327852011638786, 'Usr_loc': None, 'hashtags': []}
{'text': "RT @Powamowinstarot: Air signs  Gemini  Libra  Aquarius  ALL placements  crystal_ball \nYou've been looking for answer within, sitting alone in your own energy and You've come…", 'id': 1394327852158496773, 'Usr_loc': 'Chicago, IL', 'hashtags': []}
{'text': 'RT @CorporalBen: Since those of us that don\'t wear the Mask of\n\n Submission and haven\'t gotten a "Shot" yet, shouldn\'t we all be dead by no…', 'id': 1394327852154241027, 'Usr_loc': None, 'hashtags': []}
{'text': 'RT @OfficiallyIce: Yo allergies. Y’all win man damn.', 'id': 1394327852204630024, 'Usr_loc': 'houston', 'hashtags': []}
{'text': '@Goopypanther It used to be a much more sensible thing. When the system evolved, there was no such thing as the Int… https://t.co/GD1psgvBVL', 'id': 1394327852145807362, 'Usr_loc': 'Seattle, WA', 'hashtags': []}
{'text': "Hey, PhonePe has made payments from home easy for me. You should try it too. It's instant &amp; 100% Safe. You can send… https://t.co/p8BaTIpfaM", 'id': 1394327851244032010, 'Usr_loc': None, 'hashtags': []}
{'text': 'polo g is the best chicago rapper out rn, y’all just be  peanuts  ridinq', 'id': 1394327852364017664, 'Usr_loc': None, 'hashtags': []}
{'text': 'RT @CuomoWatch: Whoever did this, thanks!\n\n“Boat and trailer registered in OHIO because NYS DMV too expensive?! Lol\n\nCuomo’s New York y’all…', 'id': 1394327852401762308, 'Usr_loc': None, 'hashtags': []}
{'text': 'RT @NnamdisWorld: Brat Anniversary Show recap!  prince  medium-dark_skin_tone I can’t say thank you enough to everyone involved and everyone that tuned in. I feel the l…', 'id': 1394327852389109769, 'Usr_loc': 'Barcelona/Douala', 'hashtags': []}
{'text': 'I hate all man -\n\n sparkles BuT WhEn He StAbS mE iN tHe ChEsT sparkles  https://t.co/L7YX5Lkbkp', 'id': 1394327850820513798, 'Usr_loc': '21  •bi• she/her • Dramione ', 'hashtags': []}
{'text': 'RT @appIicious: If y\'all haven\'t listened to Sriti Jha\'s "what it\'s like to be asexual" and "chaabi gum gayi hai", y\'all are missing out  thumbs_up ', 'id': 1394327852472967171, 'Usr_loc': 'India', 'hashtags': []}
{'text': "RT @chess24com: The FTX Crypto Cup starts Sunday May 23!\n\n white_heavy_check_mark  The complete world Top 10\n white_heavy_check_mark  @MagnusCarlsen's next challenger @lachesisq &amp; last…", 'id': 1394327852565372931, 'Usr_loc': 'London', 'hashtags': []}
{'text': 'what the fu k', 'id': 1394327852422676481, 'Usr_loc': None, 'hashtags': []}
{'text': "@jinsviral he's not. he likes to go ALL IN. i have experienced it.", 'id': 1394327852586180616, 'Usr_loc': 'lazy editor | 21 | she/her ', 'hashtags': []}
{'text': 'RT @mama_c2: While we are all focused on Matt Gaetz today, it’s a good time for Biden to step up expanding the Supreme Court.  We now see B…', 'id': 1394327852569464833, 'Usr_loc': 'Iowa', 'hashtags': []}
{'text': 'RT @QuezRene: Sexually transmitted depression', 'id': 1394327852456321030, 'Usr_loc': 'Chicago', 'hashtags': []}
{'text': 'RT @Remroum: Don\'t talk to me about "both sides." Israel killed more Palestinians from one family today than all Israelis killed over the l…', 'id': 1394327852670017538, 'Usr_loc': '18 She/They', 'hashtags': []}
{'text': 'twitter’s moral high ground so weird... yall not really worried about minors cause y’all mutuals definitely be flir… https://t.co/4e33A1Jr74', 'id': 1394327852728963073, 'Usr_loc': '7teen', 'hashtags': []}
{'text': 'RT @pallavict: He acted then &amp; he will act now \n\nDon’t Q guts of the man who-\n\n white_heavy_check_mark did surgical strikes in PoK &amp; Pak\n\n white_heavy_check_mark wasn’t afraid of dragon in Dok…', 'id': 1394327852690989058, 'Usr_loc': 'Mumbai, India', 'hashtags': []}
{'text': 'RT @pankaj_palak: Heartthrob of millions is ruling our minds over all other matters present on social media...\n\nSSR Heartbeat Of SSRians', 'id': 1394327852741390344, 'Usr_loc': 'भोपाल, भारत', 'hashtags': []}
{'text': 'RT @Morgane__arts: All my recents A5 paintings https://t.co/ANpc3a9r34', 'id': 1394327852837838848, 'Usr_loc': 'any pronouns ✨', 'hashtags': []}
{'text': 'RT @huntizzle88: @stillgray This video cut off a line that was really good. \n\nHe’s says something like “Trump supporters had to stand in fr…', 'id': 1394327855169904645, 'Usr_loc': None, 'hashtags': []}
{'text': 'RT @RamakrishnaPee4: Hinduism is a way of life\n\nMaterial 2 non material, Namaskaram 2 shank blowing or anything under this planet was told…', 'id': 1394327855123898369, 'Usr_loc': 'Bhadrachalam, India', 'hashtags': []}
{'text': 'Let me stop before mfs try to comment and debate with me since y’all love drama so much.', 'id': 1394327855186812937, 'Usr_loc': 'CINCINNATI', 'hashtags': []}
{'text': "RT @lwtzephyr: no cause twitter was so fun back in september-december 2020? the tl literally didn't sleep for three days when harry dropped…", 'id': 1394327855186825218, 'Usr_loc': 'in your wildest dream \u200e*⊹˚.', 'hashtags': []}
{'text': 'RT @DeloitteTz: Interested in the ins and outs of the digital economy and e-commerce? This is your chance to learn about these topics from…', 'id': 1394327855174144006, 'Usr_loc': 'Dar es salaam ', 'hashtags': []}
{'text': 'RT @hyun_ssyeon: GAHYEON TEON PC\n900 All in + lsf\n(Payo)\nEta: 2-4weeks after shipout\n\n*Needs to be taken to secure https://t.co/rqbAHpF1zM', 'id': 1394327855266471948, 'Usr_loc': None, 'hashtags': []}
{'text': '@tsweet_poison We all feel lost sometimes  broken_heart ', 'id': 1394327855354556418, 'Usr_loc': None, 'hashtags': []}
{'text': 'RT @thaboyjozu: I never was the jealous type cuz when I really fw you, You have all my trust.', 'id': 1394327855404748804, 'Usr_loc': 'Horny', 'hashtags': []}
{'text': 'Juh gon sit bacc and let Big God do His work in all things bigger than me  folded_hands  dark_skin_tone  black_heart ', 'id': 1394327855379664896, 'Usr_loc': None, 'hashtags': []}
{'text': 'RT @jyrhighness: i have so much respect for u as a person. your hardships, your sufferings, how u manage pain and the obstacles u face, but…', 'id': 1394327855513817088, 'Usr_loc': None, 'hashtags': []}
{'text': 'RT @SankarshanT: This is an elected representative from the ruling party in UP. Do listen to how enfeebled these maanyavar netas have been…', 'id': 1394327855518027779, 'Usr_loc': None, 'hashtags': []}
{'text': '@Safemartians @bitforexcom all anybody needs to know about safemars lol https://t.co/H1PcpWLGcd', 'id': 1394327855350390790, 'Usr_loc': None, 'hashtags': []}
{'text': '@Topspin44sBruce @CerebainBiotech Hey thanks for all your work. I have around $4k invested so am not a bear. Not to… https://t.co/z01Y0kP5Bk', 'id': 1394327855484518401, 'Usr_loc': None, 'hashtags': []}
{'text': 'my mom aint even have the period talk with me. my cousin 3 yrs younger than me told me what a pad was &amp; i still ain… https://t.co/aU1XNtx7c0', 'id': 1394327855450972160, 'Usr_loc': '— 19 she/her multi', 'hashtags': []}
{'text': 'RT @GravelInstitute: These are all real quotes from senior Israeli officials. https://t.co/pCTBGO0lP9', 'id': 1394327855648104448, 'Usr_loc': 'Here', 'hashtags': []}
{'text': 'Y’all President that y’all voted for gave Israel $735 million worth of arms against Palestine lol', 'id': 1394327855727796224, 'Usr_loc': 'NYC - HTX', 'hashtags': []}
{'text': "curse at me until your hatred for me turns into anger, so you can let it all out and we'd be together again.", 'id': 1394327855744667649, 'Usr_loc': None, 'hashtags': []}
{'text': 'To all the 12th students those who are studying still . https://t.co/gOu1PnkSvR', 'id': 1394327855522205699, 'Usr_loc': 'Mumbai, India', 'hashtags': []}
{'text': 'RT @DelishDotCom: Here’s How To Get A Season Pass From Dairy Queen For Free Blizzards All Summer https://t.co/k3gSEfmErt', 'id': 1394327855845322758, 'Usr_loc': None, 'hashtags': []}
{'text': 'i dont like art i dont like art at all https://t.co/ds7qAKVRtN', 'id': 1394327855446863872, 'Usr_loc': 'minor white he / it / .wav', 'hashtags': []}
{'text': 'RT @QuezRene: Sexually transmitted depression', 'id': 1394327855828541442, 'Usr_loc': 'He/he', 'hashtags': []}
{'text': 'RT @Ravzaelik19: @TheSun This past week has been very tough for my home, Gaza City. I just want the world to know about the situation in Pa…', 'id': 1394327855924924419, 'Usr_loc': None, 'hashtags': []}
{'text': 'RT @kekeysl: money be buying my happiness, ion know bout y’all  loudly_crying_face .', 'id': 1394327855853719556, 'Usr_loc': 'Charlotte, NC', 'hashtags': []}
{'text': 'RT @CAMLaPistolaa: I’m never wrong &amp; y’all are never right.', 'id': 1394327855945953288, 'Usr_loc': 'the final world', 'hashtags': []}
{'text': 'RT @_TreasureME: Yep! It was actually pretty good', 'id': 1394327855929171970, 'Usr_loc': 'White Castle, LA', 'hashtags': []}
{'text': "RT @ivyjofreeman: I have bushes to cut and dance class this evening so I'm gone but not before wishing you all to have a fantastic wonderfu…", 'id': 1394327856013000704, 'Usr_loc': None, 'hashtags': []}
{'text': 'RT @emptymindthots: would y’all try this? https://t.co/x9X58nHH2l', 'id': 1394327856096874499, 'Usr_loc': 'Johannesburg, South Africa', 'hashtags': []}
{'text': 'Y’all get a sudden feeling to leave social media and never come back ? Or is it just me 🥺 backhand_index_pointing_right  backhand_index_pointing_left ', 'id': 1394327856126337024, 'Usr_loc': None, 'hashtags': []}
{'text': 'RT @misanthropicc92: Someone once said Twitter is the sociology seminar where no one has done the reading but everyone is speaking. I think…', 'id': 1394327856075976715, 'Usr_loc': 'United States', 'hashtags': []}
{'text': '@Artemis2030 Only one way to find out. Surrender all freedoms and see how it goes.', 'id': 1394327855941656578, 'Usr_loc': None, 'hashtags': []}
{'text': 'RT @ShopAtMyeondong: OKAY IM SO HAPPY FOR CHANYEOL IM GOING TO PERSONALLY GIVEAWAY 1 CHANYEOL COVER EXPANSION VERSION JUST RT THE QRT AND F…', 'id': 1394327856033931266, 'Usr_loc': 'KONTRA, BH/HB STAN DNI ❗', 'hashtags': []}
{'text': "RT @stonewalluk: This International Day Against Homophobia, Biphobia, and Transphobia, we are reminded there's still a long way to go until…", 'id': 1394327856172388356, 'Usr_loc': None, 'hashtags': []}
{'text': '@PrestonPysh @LynAldenContact @JeffBooth 1) What is stopping governments from printing money and buying up the new… https://t.co/xCOjUBmyep', 'id': 1394327856205942792, 'Usr_loc': None, 'hashtags': []}
{'text': 'but seriously, back to my everyday question, how can they all be so handsome... they were carefully sculpted https://t.co/LZkFanf68i', 'id': 1394327855987789826, 'Usr_loc': "she!her , '03 ✶interact for fb", 'hashtags': []}
{'text': '@dearqatience i mean all of the above', 'id': 1394327856340258819, 'Usr_loc': 'aidan, mads, isaac, faye   ♡', 'hashtags': []}
{'text': ' face_with_tears_of_joy  face_with_tears_of_joy  face_with_tears_of_joy  face_with_tears_of_joy  face_with_tears_of_joy  face_with_tears_of_joy  legend lol', 'id': 1394327856310796290, 'Usr_loc': 'Pans Beach', 'hashtags': []}
{'text': "RT @clichoid: Confirms today's article about the Home Office in @Guardian today. Appalling treatment. Won't do British business any good at…", 'id': 1394327856298213378, 'Usr_loc': 'London, England', 'hashtags': []}
{'text': '@ianclarkguitar @DrEricDing @PetePumper @60Minutes You understand there’s videos of it by government as well as mul… https://t.co/7b0oZH2ta3', 'id': 1394327856365326340, 'Usr_loc': None, 'hashtags': []}
{'text': "RT @exo_statistics: 'DON'T FIGHT THE FEELING (Expansion Ver.)' debuts at #1 on Ktown4u Daily Chart (5/17/21) with 20,105 copies sold!  fire \n\n—…", 'id': 1394327856503611394, 'Usr_loc': 'South Korea', 'hashtags': []}
{'text': 'In 1991, the UK Government lifted the ban on LGBT+ people serving openly in the UK Diplomatic Service.\n\nOver the pa… https://t.co/S101h8dJgg', 'id': 1394327856256323584, 'Usr_loc': 'Cairo, Egypt', 'hashtags': []}
{'text': 'RT @elonmusk: @PeterMcCormack Obnoxious threads like this make me want to go all in on Doge', 'id': 1394327856595935239, 'Usr_loc': 'San Diego, CA', 'hashtags': []}
{'text': '@James64002261 @tiktok_us My tiktok also got  banned for reasons unknown to me, after contacting the support with n… https://t.co/xBDMPGxJbL', 'id': 1394327856503791621, 'Usr_loc': 'Los Angeles, CA', 'hashtags': []}
{'text': 'RT @DavidHirsh: ...The old Rabbi had some wise words:  "We do not turn secular questions into theological ones."\n\n"All that is solid melts…', 'id': 1394327856591822848, 'Usr_loc': 'Barnet, London.', 'hashtags': []}
{'text': 'RT @taragirl69: Why not to say thank you to all my 237k followers with this little tease? Thank you  smiling_face_with_smiling_eyes   heart_with_arrow  red_heart ️ heavy_heart_exclamation ️ heavy_heart_exclamation ️ heavy_heart_exclamation ️ https://t.co/fGwm33uxCw', 'id': 1394327856633815040, 'Usr_loc': 'UK ', 'hashtags': []}
{'text': 'RT @FatCash7: $EEGI clear skies over .01  .02-03 this week\n$TAWNF expect another giant gap up tomorrow like this morning. could close near…', 'id': 1394327856600084481, 'Usr_loc': 'Salt Lake City Utah', 'hashtags': []}
{'text': '@Die4Jay all this cus u got kicked  rolling_on_the_floor_laughing  face_with_tears_of_joy  loudly_crying_face  rolling_on_the_floor_laughing  face_with_tears_of_joy  loudly_crying_face  rolling_on_the_floor_laughing  face_with_tears_of_joy  loudly_crying_face  rolling_on_the_floor_laughing  face_with_tears_of_joy  loudly_crying_face  face_with_tears_of_joy  loudly_crying_face ', 'id': 1394327859242668036, 'Usr_loc': '17', 'hashtags': []}
{'text': 'Y’all playing checkers, I’m playing chess &amp; I’m about to checkmate', 'id': 1394327856767963140, 'Usr_loc': None, 'hashtags': []}
{'text': "RT @_mymusictaste: The bunny rabbit_face leader's day has arrived with the charisma flowing from her stage presence! Happy birthday to @hf_dreamcatcher…", 'id': 1394327859259346954, 'Usr_loc': None, 'hashtags': []}
{'text': '@ArmaanMalik22 @ericnamofficial @KSHMRmusic We all are waiting for it. This is sooo exciting!! red_heart ️', 'id': 1394327859196416004, 'Usr_loc': '20, she/her', 'hashtags': []}
{'text': 'RT @appIicious: If y\'all haven\'t listened to Sriti Jha\'s "what it\'s like to be asexual" and "chaabi gum gayi hai", y\'all are missing out  thumbs_up ', 'id': 1394327859347460097, 'Usr_loc': 'India', 'hashtags': []}
{'text': 'No offense to y’all I love u and I’m on the same page so I can’t say much', 'id': 1394327859351728134, 'Usr_loc': 'he/they', 'hashtags': []}
{'text': 'RT @scorgi_official: Of all wallets currently holding SpaceCorgi, the top holder is just  sparkles  1.4%  sparkles  The REST of the top holders barely 1%. Pu…', 'id': 1394327859422908421, 'Usr_loc': None, 'hashtags': []}
{'text': 'This is a great and excellent project and also the reward is great. Thanks for shared this wonderful opportunity. B… https://t.co/XG8h3nJ0vT', 'id': 1394327858689028103, 'Usr_loc': None, 'hashtags': []}
{'text': 'Check the thread and help in accomplishment of deal \nU just have to like and rt  red_heart ', 'id': 1394327859452256259, 'Usr_loc': 'India', 'hashtags': []}
{'text': "RT @Limstar8: After THAT Thursday I think all melodies need to go on a hiatus I don't think anyone of us are in their right mind , we all a…", 'id': 1394327859523571712, 'Usr_loc': 'KPOP & KHIPHOP', 'hashtags': []}
{'text': 'RT @EoinHiggins_: You see all of the kids around me, they’re just kids.  \n\nWhy would you just send a missile to them?\n\n— a 10-year-old girl…', 'id': 1394327859448123396, 'Usr_loc': 'Jordan', 'hashtags': []}
{'text': 'RT @93craccbaby: This Saturday you definitely don’t want to miss it. Entrance is free come on down everybody.', 'id': 1394327859506950148, 'Usr_loc': 'Houston, TX', 'hashtags': []}
{'text': 'While true of all territories, it was especially true for the Holy Land. How then, was it possible for the State of… https://t.co/UmW89ZEJiq', 'id': 1394327859531960327, 'Usr_loc': 'Maldives', 'hashtags': []}
{'text': 'RT @Haqiqatjou: If world leaders are so concerned about Palestine\'s "indiscriminate rocket fire," maybe they should all pitch in and give P…', 'id': 1394327859662106632, 'Usr_loc': None, 'hashtags': []}
{'text': "RT @Invisigoth8: Every day we are a step closer to an independent Scotland ..many still don't know enough to come on board ..we need to get…", 'id': 1394327859657940995, 'Usr_loc': None, 'hashtags': []}
{'text': 'RT @SinfulGarfield: GUYSSSSSSSS\ni have commissions open and now i accept tf2 keys and converted it all &gt;:)\n\nRTS are REALLY appreciated!!!!…', 'id': 1394327859725017088, 'Usr_loc': 'dead', 'hashtags': []}
{'text': 'RT @zedsdead: FEELS SO GOOD TO ANNOUNCE THAT WE’RE THROWING A MASSIVE BACKYARD JAMBOREE ON JULY 4TH WITH ALL OUR DEADBEATS FRIENDS!! FOOD,…', 'id': 1394327859884298248, 'Usr_loc': 'AndraeStrong', 'hashtags': []}
{'text': 'RT @tomgara: Extraordinary photo from Gaza on the front page of The Guardian today - six year old Suzy Eshkuntana pulled alive from the rub…', 'id': 1394327859322306564, 'Usr_loc': 'Quito, Ecuador', 'hashtags': []}
{'text': 'Todays vibe = billie holiday \nSouls a funny thing\nWe’re all just souls\nThat possess bodies\nMine souls still waiting… https://t.co/mb7CoSNDRO', 'id': 1394327859842461702, 'Usr_loc': 'Karma+Dharma=Samsara - Chicago', 'hashtags': []}
{'text': 'Protect all the people I love amen  red_heart ️ red_heart ️ red_heart ️', 'id': 1394327860018548737, 'Usr_loc': 'saginaw mi', 'hashtags': []}
{'text': 'RT @blessadj: Bro. After all these years I was just clicking for luck https://t.co/lBf0Y7dVHZ', 'id': 1394327860018651137, 'Usr_loc': None, 'hashtags': []}
{'text': 'RT @namaniadaorang: When someone hurts your feelings. That’s okay. Trust the process which is they will get their kifarah soon. Just focus…', 'id': 1394327860022702092, 'Usr_loc': 'Barat Daya, Pulau Pinang', 'hashtags': []}
{'text': 'RT @nigelgbrook: @landerking_king @sara35180 @luckyma_man Coupled with the @Conservatives steeped in corruption &amp; cronyism &amp; focused on the…', 'id': 1394327859947360259, 'Usr_loc': None, 'hashtags': []}
{'text': '@toolkitsforall Wonderful that means y’all will be around another month!  rolling_on_the_floor_laughing  rolling_on_the_floor_laughing  rolling_on_the_floor_laughing  rolling_on_the_floor_laughing  rolling_on_the_floor_laughing ', 'id': 1394327860123512834, 'Usr_loc': 'Promotions@BwcDeals.com', 'hashtags': []}
{'text': 'RT @khanna248: There are a lot of things which Modi should have said but he did not because he is not like others. He will take all the bea…', 'id': 1394327860345671683, 'Usr_loc': 'Bangalore', 'hashtags': []}
{'text': "I'm leaving it all behind to live my dream: Licking peanut butter off frogs.", 'id': 1394327860328996865, 'Usr_loc': 'Switzerland', 'hashtags': []}
{'text': 'if you can’t make friends on here just say that', 'id': 1394327860266024961, 'Usr_loc': 'they/them | priv when 💤', 'hashtags': []}
{'text': 'RT @Farda_Alphonso: He got to do me first to show me he’s all business.', 'id': 1394327860329029632, 'Usr_loc': '@ work', 'hashtags': []}
{'text': 'RT @EmilyDenver8: Just a reminder that Trump and Kushner created a shell company to secretly pay Trump family members &amp; spend half the camp…', 'id': 1394327860433784836, 'Usr_loc': 'Tennessee', 'hashtags': []}
{'text': 'RT @chubskullgrunt: Looks like Team Skull got in some heat with some of the other teams around the world...\n\nAnd the only way to solve it,…', 'id': 1394327860526059520, 'Usr_loc': None, 'hashtags': []}
{'text': '[May 17, 2021 at 9:23 am] All The Small Things by Blink 182', 'id': 1394327860630876162, 'Usr_loc': 'Not Canada *gasp*', 'hashtags': []}
{'text': 'We sent a message to  the Palestinian people: In your struggle for freedom, you will never be alone. Humanity peopl… https://t.co/aR6ChqA0cA', 'id': 1394327860098211843, 'Usr_loc': 'Koothanallur', 'hashtags': []}
{'text': 'We have a wide choice of fine wines, beers and spirits to suit all tastes...', 'id': 1394327860651962372, 'Usr_loc': '1-2 village Square | SK7 1AW', 'hashtags': []}
{'text': 'RT @rajasekharv1979: By the way, that does make one wonder why @ptrmadurai was quiet all along when Tamilnadu temples have been going from…', 'id': 1394327860664410113, 'Usr_loc': None, 'hashtags': []}
{'text': '@Dominic2306 3/ Perhaps you can shed some light on WHY the government decided to go against all common sense (which… https://t.co/t2r8lT9M0J', 'id': 1394327860366688266, 'Usr_loc': None, 'hashtags': []}
{'text': "get. in. the. line. we are all thirsting for him you're nothing special\nyou're tastier than us but still. get in th… https://t.co/Gtj3k3Y1pD", 'id': 1394327860630990850, 'Usr_loc': 'sometimes ns fw. i rant alot ', 'hashtags': []}
{'text': 'Surely this nonsense is the final straw for Yousaf. The man is a bitter wee moron. Using a clearly dubbed(he knows… https://t.co/6kO7vX48lt', 'id': 1394327860794568710, 'Usr_loc': 'Inverness, Scotland', 'hashtags': []}
{'text': 'RT @iamlaurenp: This has slain me all day. \n\nDogs are just the best. https://t.co/Tx3PgnqvaH', 'id': 1394327860907741188, 'Usr_loc': 'Detroit, MI ', 'hashtags': []}
{'text': 'Y’all do I have to have good grades to change majors? /gen', 'id': 1394327861004226567, 'Usr_loc': 'she/her 18', 'hashtags': []}
{'text': '@VFreedoms @canadiancarol1 Ban all religion yes, ban one? No', 'id': 1394327860849123339, 'Usr_loc': 'Wales, United Kingdom', 'hashtags': []}
{'text': 'RT @zedsdead: FEELS SO GOOD TO ANNOUNCE THAT WE’RE THROWING A MASSIVE BACKYARD JAMBOREE ON JULY 4TH WITH ALL OUR DEADBEATS FRIENDS!! FOOD,…', 'id': 1394327860911874049, 'Usr_loc': 'Denver, CO', 'hashtags': []}
{'text': '@carmen_alyssa Hell naw you can be dead and all lol', 'id': 1394327860937170945, 'Usr_loc': 'Virginia Beach, VA', 'hashtags': []}
{'text': "@TheRedmenTV I'm not religious at all, but the part about God showing his love through people is just beautiful", 'id': 1394327860970655747, 'Usr_loc': None, 'hashtags': []}
{'text': 'RT @Farda_Alphonso: He got to do me first to show me he’s all business.', 'id': 1394327860958138371, 'Usr_loc': 'Lagos, Nigeria', 'hashtags': []}
{'text': 'RT @suchaninniter: hey you all. instead of blowing up random gain tweets for poc and talking about racists ( techno rn ) heres a thread tha…', 'id': 1394327863491502082, 'Usr_loc': 'They/them, minor', 'hashtags': []}
{'text': 'It’s difficult to excel in all areas of end-to-end connectivity within our industry. Through the Open Industry 4.0… https://t.co/o1Gcsq9Ory', 'id': 1394327862552010752, 'Usr_loc': 'Shelby Township, MI 48315', 'hashtags': []}
{'text': '@balfeslove I’m so sorry you have to deal with this injustice!! You are a lovely lady and a beautiful person, insid… https://t.co/WZi3CJFP9h', 'id': 1394327863487205390, 'Usr_loc': None, 'hashtags': []}
{'text': 'My daughter started daycare today first time she has been away from me or her dad during the day! All I want to do is go and get her...', 'id': 1394327863596392451, 'Usr_loc': None, 'hashtags': []}
{'text': 'RT @NYSenatorRivera: Folks: this ain’t a story.  \n\nAt least not the one whomever did this weak ass oppo dump meant it to be. \n\nIt’s actuall…', 'id': 1394327863285927936, 'Usr_loc': 'New York, USA', 'hashtags': []}
{'text': 'RT @GauSevaAgniveer: . @agniveer-Pranin team got informed at night about an injured Gauvansh. Team went and got the treatment done. Naman t…', 'id': 1394327863650705411, 'Usr_loc': None, 'hashtags': []}
{'text': 'Really and truly!', 'id': 1394327863772463106, 'Usr_loc': 'Bahamas 🇧🇸', 'hashtags': []}
{'text': '@eXalt_truth Not the brightest eh? Those 3 losses were 3-2 so yeah 1 map makes a difference. All I’ve said were fac… https://t.co/jUkakoOEsB', 'id': 1394327863848050691, 'Usr_loc': None, 'hashtags': []}
{'text': 'RT @danielhowell: through all life’s troubles and trials it can be difficult to ‘be thankful’ - but you will thank yourself\n\nhttps://t.co/j…', 'id': 1394327863952875524, 'Usr_loc': 'United States', 'hashtags': []}
{'text': 'RT @ZtozM: Congratulations to @thuzarwintlwin for winning the best National Costume for 69th @MissUniverse competition. We’re also thankful…', 'id': 1394327864045047812, 'Usr_loc': None, 'hashtags': []}
{'text': "@Zander85379724 @Vladolak @AP He doesn't get to force another through pregnancy, though. So having a say could do sod all in reality.", 'id': 1394327864116396039, 'Usr_loc': 'North West, England 🇬🇧', 'hashtags': []}
{'text': 'RT @dreamgeminie: thank you gays all for 30K!!! to celebrate I’m giving away free subscriptions retweet for a chance to win sparkles  https://t.co/i…', 'id': 1394327864145702916, 'Usr_loc': 'Central & Western District', 'hashtags': []}
{'text': 'Just joined the $RUN airdrop!\n\nGo follow @runnodes and check out this amazing project.\n\nAll you need is a $SOL address to get it.', 'id': 1394327864175124481, 'Usr_loc': 'Lagos, Nigeria', 'hashtags': []}
{'text': "Me: I'm not a fan of your account. Your takes are weak.\nYou: Lmao u logged in just to say that, obsess much??\nMe: r… https://t.co/NcDZNxVrD5", 'id': 1394327864082931718, 'Usr_loc': None, 'hashtags': []}
{'text': 'Here is another strike from Salainkyi township Sagaing region which oppose a retrogressive education system given b… https://t.co/RGNePiPZFW', 'id': 1394327863948623873, 'Usr_loc': None, 'hashtags': []}
{'text': 'RT @EXOPublicity: 200$ for EXO ComeBack If we get 20k likes  fire   Can we do it as fast as possible?  thinking_face  We have only 20Days left from CB sneezing_face lets do…', 'id': 1394327864149950473, 'Usr_loc': None, 'hashtags': []}
{'text': 'RT @RaiderBrodie: The Nigga 8 feet tall playing with the Goat y’all better be #1 in all categories.. but wait.. y’all fighting for y’all pl…', 'id': 1394327864107929602, 'Usr_loc': None, 'hashtags': []}
{'text': 'RT @pmishra9270: @bijlesh @lkopolice @CMHelpline1076 @CMOfficeUP @Uppolice @dgpup We all are fighting for money. They cheat us and we are c…', 'id': 1394327864242184199, 'Usr_loc': None, 'hashtags': []}
{'text': "Some of y'all will make wonderful wives and husbands fr. Somebody will be lucky to call you their own.", 'id': 1394327864317779970, 'Usr_loc': None, 'hashtags': []}
{'text': 'RT @stevesalaita: The love and kinship coming from Hawaii, from Kashmir, from Native America, from the Arab World, from Ireland, from Iran,…', 'id': 1394327864317825036, 'Usr_loc': 'London', 'hashtags': []}
{'text': 'RT @EXOBBS50_CHARTS: EXO IS HOME....\n\nWe obtained a deal from @JamesB_65 who will be giving funds in return for 10k likes. \n\nPlease help us…', 'id': 1394327864376537088, 'Usr_loc': None, 'hashtags': []}
{'text': "RT @alientyong: happy one year anniversary to taeyong's drunk bubble messages  loudly_crying_face ", 'id': 1394327864464470017, 'Usr_loc': 'bbh lty pcy • wæsean gsblf', 'hashtags': []}
{'text': "RT @lmorchard: * grapes don't drink wine\n* diamonds can't wear themselves\n* olives can't taste oil\n* seeds die if they don't reach the ligh…", 'id': 1394327864611282954, 'Usr_loc': None, 'hashtags': []}
{'text': '18/ "I’d be interested in GVB’s response to my characterisation so far, because I genuinely don’t understand his na… https://t.co/fZ8kswyM0e', 'id': 1394327864598794247, 'Usr_loc': None, 'hashtags': []}
{'text': 'Y’all Made It Selmteen Days Into The Month Before Having The “Bills” Conversation. Proud Of Yall.', 'id': 1394327864842018818, 'Usr_loc': 'United States Of Florida', 'hashtags': []}
{'text': 'At of all the ones, this is the best one lmao', 'id': 1394327864812609537, 'Usr_loc': 'Bay Area, CA', 'hashtags': []}
{'text': 'RT @Patchouliman1: $GABLF  fire  fire  fire  fire ', 'id': 1394327864904851458, 'Usr_loc': 'Level 2 ', 'hashtags': []}
{'text': "Y'all are rude to people just for a couple or likes. Sies", 'id': 1394327864997199886, 'Usr_loc': 'Views From The 11', 'hashtags': []}
{'text': 'RT @Delamereevents: Normally when we build a marquee we put tables, chairs and a dancefloor in it! This week it’s a swimming pool! We  red_heart ️ th…', 'id': 1394327865102061571, 'Usr_loc': 'chester', 'hashtags': []}
{'text': 'RT @marcosalvarado_: The biggest flex is turning all your wounds into wisdom.', 'id': 1394327865244585984, 'Usr_loc': None, 'hashtags': []}
{'text': 'AAAA WHY ARE THERE LEAKS ALL OVER MY TL', 'id': 1394327865332731906, 'Usr_loc': '•|i|• Ø i+! ].[', 'hashtags': []}
{'text': '@AndrewBowie_MP Oh Dear, here we go again\nMuch like the B Gates lectures &amp; profiles about all things futuristic/Bri… https://t.co/rAoYe4n2cs', 'id': 1394327865315954690, 'Usr_loc': None, 'hashtags': []}
{'text': 'RT @Farah_Gazan: Nonstop heavy airstrikes since yesterday, all around Gaza, on the streets and infrastructure, citizens houses, cars, peopl…', 'id': 1394327865471156233, 'Usr_loc': None, 'hashtags': []}
{'text': 'RT @JYU5H1: all my tweets asking for help died. i’m not getting attention, but i need help desperately. i’m giving up…\n\ni’m 20, mentally il…', 'id': 1394327865357963264, 'Usr_loc': 'Mega City', 'hashtags': []}
{'text': 'RT @tomgara: Extraordinary photo from Gaza on the front page of The Guardian today - six year old Suzy Eshkuntana pulled alive from the rub…', 'id': 1394327865529929730, 'Usr_loc': 'Home', 'hashtags': []}
{'text': '+ I want everyone with enough strength to be at the oars and by sunrise you all will be out of these islands.”\n\nOnc… https://t.co/WCBev4XHwr', 'id': 1394327865412358150, 'Usr_loc': 'Velaris', 'hashtags': []}
{'text': 'RT @StickboyBangkok: Social media users are asking why are they not cleaning up all the khlongs... https://t.co/TgCOwwPewY', 'id': 1394327865609445377, 'Usr_loc': 'Alhambra, España', 'hashtags': []}
{'text': 'RT @thiacyn6: I need 300 retweets to win this🥺 heart_suit ️. Kindly retweet for me folded_hands  https://t.co/NaLza0bhrx', 'id': 1394327865458626566, 'Usr_loc': 'Kampala-Uganda', 'hashtags': []}
{'text': 'Today we have been finding out all about plastic in our oceans. We worked collaboratively to make a class poster...… https://t.co/xFwesmtxtb', 'id': 1394327864703700992, 'Usr_loc': None, 'hashtags': []}
{'text': "RT @TXTOFFlCIAL: the competition is getting more and more intense on the comeback week. MOA! this is txt's 2nd full album, let's make sure…", 'id': 1394327865718493185, 'Usr_loc': None, 'hashtags': []}
{'text': 'RT @FredKatz: During interviews for this story, I told people I wanted to “Last Dance” Russell Westbrook.\n\nWe know all these anecdotes abou…', 'id': 1394327865819373570, 'Usr_loc': 'Milwaukee', 'hashtags': []}
{'text': "RT @jjunieblues: this has been said so many times but txt are always vocal about this comeback so please let's focus on giving them the mus…", 'id': 1394327865806577666, 'Usr_loc': ' 061313, 082219, 091120', 'hashtags': []}
{'text': 'Al Rawi start flinging around a whole set of euphemisms just to avoid saying what we all know, that the country ful… https://t.co/Z5EUW2kVnd', 'id': 1394327865836122120, 'Usr_loc': 'Trinidad and Tobago', 'hashtags': []}
{'text': 'this whole thread 🥺 aaaaaaa my heart is soft', 'id': 1394327867639558144, 'Usr_loc': ' SHE/HER • INFJ-T', 'hashtags': []}
{'text': 'RT @L_Rocks_Well: That’s all y’all be bitches be talmbout. Y’all boring AND draining. Nigga wanna just chill enjoy life and have fun and he…', 'id': 1394327867681648642, 'Usr_loc': 'Anywhere, USA', 'hashtags': []}
{'text': 'RT @Farah_Gazan: Nonstop heavy airstrikes since yesterday, all around Gaza, on the streets and infrastructure, citizens houses, cars, peopl…', 'id': 1394327867740200963, 'Usr_loc': 'jb', 'hashtags': []}
{'text': 'RT @MichaelMontalt2: Let’s retweet this all over Twitter. https://t.co/1eUgK7lDtp', 'id': 1394327867765379072, 'Usr_loc': None, 'hashtags': []}
{'text': 'RT @PFLAG: May 17 marks the International Day Against Homophobia, Transphobia and Biphobia. We celebrate all people proudly and loudly toda…', 'id': 1394327867752861704, 'Usr_loc': None, 'hashtags': []}
{'text': "it's your perfect chance to give this to taeyong", 'id': 1394327867757039620, 'Usr_loc': 'tyongf and kangaji ', 'hashtags': []}
{'text': 'I agree. Cause all of you seem to have found love pensive_face ', 'id': 1394327867853574148, 'Usr_loc': 'Your Head.', 'hashtags': []}
{'text': "RT @cheonsa_ragu: Carats saying their broke af but watch this pre order gets sold out tomorrow in minute,, y'all ain't fooling me this time loudly_crying_face ", 'id': 1394327868021231619, 'Usr_loc': '032215 ; svt | nct', 'hashtags': []}
{'text': '@deniedtrauma “I can’t help it . . . You’re too irresistible. Plus when you send me pictures at work, you know what… https://t.co/B1cx6HoS74', 'id': 1394327867790663687, 'Usr_loc': 'Writer is 23', 'hashtags': []}
{'text': 'Tax day is here. Plus, all the latest in personal finance: https://t.co/ObZTE32lOC https://t.co/lYgswgqJw4', 'id': 1394327867446677506, 'Usr_loc': 'New York, NY', 'hashtags': []}
{'text': 'RT @Brian_Riedl: Medicare-For-All would cost approx $3.2 trillion/yr, while defense currently spends $733 billion. \n\nWhich is why neither R…', 'id': 1394327867866103819, 'Usr_loc': None, 'hashtags': []}
{'text': "It's more than that so I can't summarise it all (Zimeshika).\n\nA summary in a thread; \nhttps://t.co/pVwmovKBRx", 'id': 1394327867849416708, 'Usr_loc': 'Kiandutu ', 'hashtags': []}
{'text': 'RT @ThatYaoiBoyy20:  eggplant  eggplant There I was in the back of the Carriage letting the man who rescued me from those rapist goblins make sweet love to m…', 'id': 1394327868126109701, 'Usr_loc': None, 'hashtags': []}
{'text': "@Garf4153 From a design standpoint im pretty sure they're  made short to emphasize how you're fighting something bi… https://t.co/UKfpTQRPgd", 'id': 1394327867983601668, 'Usr_loc': None, 'hashtags': []}
{'text': '“We’re only able to do a great job because of the foundation laid many years ago by all of you in this room,” said… https://t.co/HWSVYPyQAw', 'id': 1394327868046553094, 'Usr_loc': 'Marietta, Ga', 'hashtags': []}
{'text': "RT @jjunieblues: this has been said so many times but txt are always vocal about this comeback so please let's focus on giving them the mus…", 'id': 1394327868214177792, 'Usr_loc': None, 'hashtags': []}
{'text': 'RT @Aalayams1: All-female SSRians are requested to remove their pics from their dp (all social media wherever they support ssr)  folded_hands \nBecause t…', 'id': 1394327868138659843, 'Usr_loc': None, 'hashtags': []}
{'text': 'When "GB" is just a brand for tax exiles and shit stirrers:', 'id': 1394327868071632900, 'Usr_loc': 'Yorkshire / Around the globe', 'hashtags': []}
{'text': "A new JFF superfan is enjoying my 79 videos, 173 posts, 702 photos, and 1748 likes. Here's a sneak peek. See ALL my… https://t.co/07OHTTjmbQ", 'id': 1394327867526418434, 'Usr_loc': None, 'hashtags': []}
{'text': '@tragicBud @Alyovsky_ @schlomo1111 @pinkpastele @LebUpdate Wrong.Allah created the fate of every single human being… https://t.co/LA3xAV7Kcg', 'id': 1394327868243693570, 'Usr_loc': None, 'hashtags': []}
{'text': 'RT @6ixIn6: zach lowe hops on every podcast and praises OG like a pastor praising Jesus yet he’ll never write his name on that all-defence…', 'id': 1394327868528893958, 'Usr_loc': None, 'hashtags': []}
{'text': "RT @exo_statistics: 'DON'T FIGHT THE FEELING' has now surpassed 108 THOUSAND (108,000) pre-orders on Ktown4u alone!\n\nPB 1 - 43,576\nPB 2 - 3…", 'id': 1394327868507791360, 'Usr_loc': 'exo/nct-wayv 🧸🥣', 'hashtags': []}
{'text': 'RT @WomenReadWomen: In Mérignac, a woman was shot by her husband, doused with petrol, and set alight.\n\nShe was the 39th victim of femicide…', 'id': 1394327868537200651, 'Usr_loc': None, 'hashtags': []}
{'text': "I've always wanted to see how this would look\nEveryone on here ur all Goats https://t.co/5U5jPReAr2", 'id': 1394327868180680707, 'Usr_loc': 'London, England 🏴\U000e0067\U000e0062\U000e0065\U000e006e\U000e0067\U000e007f', 'hashtags': []}
{'text': 'RT @ScottZILWarrior: I will send one random person $350 in 24hrs all you have to do is RT and be following myself and @FootballStarsIO\n\nAdd…', 'id': 1394327868532924421, 'Usr_loc': 'Malang', 'hashtags': []}
{'text': 'RT @UrbanXpat: May they all who was involved in this and all their supporters should die a horrible death and their dead body should be eat…', 'id': 1394327868570701825, 'Usr_loc': None, 'hashtags': []}
{'text': '@ReySantoscrypto please.  I am new to crypto and I lost almost all the money trying to help my family in Argentina', 'id': 1394327868679892993, 'Usr_loc': None, 'hashtags': []}
{'text': 'RT @LondynnchaneI: Idk why y’all be having discourses on pegging men like if you want to peg your nigga find you one whose comfortable with…', 'id': 1394327868633665537, 'Usr_loc': '773', 'hashtags': []}
{'text': 'RT @TheTransformiss: Miss April Pin-Up 2021: Witness Protection:\n\n(Special thanks to jack4716 for the suggestion, and for all of my wonderf…', 'id': 1394327868667203584, 'Usr_loc': None, 'hashtags': []}
{'text': "RT @cheonsa_ragu: Carats saying their broke af but watch this pre order gets sold out tomorrow in minute,, y'all ain't fooling me this time loudly_crying_face ", 'id': 1394327868738473993, 'Usr_loc': 'im the mafia', 'hashtags': []}
{'text': 'RT @addictwjn: hey, mari mutualan sm jodoh jeno!! looking for new moots esp nctzen and wayzenni ! all fandom allowed — help rt/like thankie…', 'id': 1394327868784607233, 'Usr_loc': None, 'hashtags': []}
{'text': 'RT @_dnxw: i used to be the “chaser” in all of my friendships &amp; relationships.. literally begging for reciprocation and to be treated corre…', 'id': 1394327868793032712, 'Usr_loc': 'missing country girls', 'hashtags': []}
{'text': 'RT @_JessPatton: With the playoffs starting Wednesday for the all-Canadian division and the current COVID-19 restrictions, how are you plan…', 'id': 1394327868935741440, 'Usr_loc': 'Toronto', 'hashtags': []}
{'text': 'RT @Rerants1: Does anyone ever see any of my tweets at all? Very frustrating', 'id': 1394327868918931463, 'Usr_loc': 'Harrells NC USA', 'hashtags': []}
{'text': 'RT @sabrinahellfire: What’s your favorite all you can eat buffet? 🥵 smiling_face_with_horns  https://t.co/JEF1Apu25I', 'id': 1394327868943978500, 'Usr_loc': None, 'hashtags': []}
{'text': 'RT @chojiharris: if im smiling all alone while looking at my phone , that means im watching cute cat videos', 'id': 1394327869019463680, 'Usr_loc': 'home.875', 'hashtags': []}
{'text': 'RT @khairul_hafidz: This is a very important message to all. Please follow this advice.', 'id': 1394327868977582080, 'Usr_loc': 'Alexandria, Egypt', 'hashtags': []}
{'text': 'RT @jHollywoodstar: uknow u can only start truly enjoying seventeens comebacks when you loose all expectations on design concept and stylin…', 'id': 1394327869111902210, 'Usr_loc': 'she/her - 20', 'hashtags': []}
{'text': 'RT @MsRoyalY: Y’all Grey still saying thank you and he be eating good af https://t.co/CBhJ2omDfF', 'id': 1394327869191503874, 'Usr_loc': '409𝚃𝙴𝚇𝙰𝚂', 'hashtags': []}
{'text': 'RT @isarallah: Elections are not monopolized by anyone, they are not monopolized by the clergy, they are not monopolized by parties, they a…', 'id': 1394327869183115267, 'Usr_loc': None, 'hashtags': []}
{'text': 'RT @heistemi1: Design…a balance between form and function…it takes two.- Seesaw\n\nA four bedroom all ensuite bungalow design with two living…', 'id': 1394327869137072128, 'Usr_loc': 'Relatable tweets', 'hashtags': []}
{'text': 'RT @iamlaurenp: This has slain me all day. \n\nDogs are just the best. https://t.co/Tx3PgnqvaH', 'id': 1394327869216763904, 'Usr_loc': None, 'hashtags': []}
{'text': 'RT @3sidedstory: Keep your hands off the unborn children.', 'id': 1394327869195624454, 'Usr_loc': 'California', 'hashtags': []}
{'text': 'y’all play games?', 'id': 1394327871859027969, 'Usr_loc': 'Cinema’s もも. Bisexual.', 'hashtags': []}
{'text': 'i will ALWAYS be cocky cause mark specially named jamaican girls . y’all cant tell me shit \n https://t.co/itum7elUkO', 'id': 1394327871796154369, 'Usr_loc': 'sungchans best friend | black', 'hashtags': []}
{'text': 'RT @mmodeww_: mau cari mutual stay, nctzen, wayzenni, atiny, deobi, blink, ikonic, army, exo-l, melody, buddy, aroha, ahgase, myday, carat,…', 'id': 1394327871905173504, 'Usr_loc': None, 'hashtags': []}
{'text': 'RT @Farah_Gazan: Nonstop heavy airstrikes since yesterday, all around Gaza, on the streets and infrastructure, citizens houses, cars, peopl…', 'id': 1394327871871619081, 'Usr_loc': 'Malaysia', 'hashtags': []}
{'text': 'RT @CaucasianJames: y’all mind if i have a good week', 'id': 1394327871984914433, 'Usr_loc': 'Monterrey, Nuevo León', 'hashtags': []}
{'text': '@zarcon_360 @IDF Good hopefully the ifd wipes them all out and can have peace for a time.', 'id': 1394327872056274946, 'Usr_loc': None, 'hashtags': []}
{'text': 'RT @ScottZILWarrior: I will send one random person $500 in 48hrs all you have to do is RT and be following myself &amp; @ispolink \n\nShow the sp…', 'id': 1394327872102309896, 'Usr_loc': 'Planet Earth', 'hashtags': []}
{'text': 'you’re all I need, the very air I breathe.', 'id': 1394327872228139014, 'Usr_loc': None, 'hashtags': []}
{'text': 'I lost my account at 21700 followers', 'id': 1394327872131764233, 'Usr_loc': 'BMW_SA', 'hashtags': []}
{'text': '@PetalumaPegleg @redact__ @KetoKat2 @JackMallers @elonmusk @EmperorBTC @CryptoWhale All religion requires dogma. If… https://t.co/Tqhy5jwMlr', 'id': 1394327872140201985, 'Usr_loc': 'Van down by the river', 'hashtags': []}
{'text': 'This really is excellent - and enlightening.  Do give it a read.', 'id': 1394327872165359619, 'Usr_loc': 'UK', 'hashtags': []}
{'text': "Children in gaza and all over Palestine needs help it's tragic there specially in gaza . You do not have to be a Mu… https://t.co/HqDqTZvxIP", 'id': 1394327872018464777, 'Usr_loc': None, 'hashtags': []}
{'text': 'RT @StressOfLagos: What has happened to all the money they have gotten in the past?\n clown_face  clown_face  clown_face ', 'id': 1394327871951450119, 'Usr_loc': 'Lagos', 'hashtags': []}
{'text': 'RT @CaucasianJames: y’all mind if i have a good week', 'id': 1394327872354062338, 'Usr_loc': None, 'hashtags': []}
{'text': 'RT @dougboneparth: “Dad, why are all the numbers on your screen red?” Go to your room.', 'id': 1394327872278614025, 'Usr_loc': None, 'hashtags': []}
{'text': 'RT @ButterflyLove_8: Thank U Senator @ossoff\n\nALL Dems @SenateDems @HouseDemocrats NeedTo JoinIn This Statement To Ceasfire. @JoeBiden @POT…', 'id': 1394327872215650307, 'Usr_loc': None, 'hashtags': []}
{'text': '@CP24 Reopened? Everyone was playing at all sorts of amenities this weekend. People have reopened them.', 'id': 1394327872375033860, 'Usr_loc': 'In Ontario', 'hashtags': []}
{'text': 'RT @HaryaxPathak: Reiterating this.\n\nWith a cyclone approaching MH and Gujarat, a Third Wave expected, all hospital staff exhausted beyond…', 'id': 1394327872307793921, 'Usr_loc': 'Mumbai', 'hashtags': []}
{'text': 'RT @PhuketDailyNews: All the best cheap laptops from the most popular brands: Sometimes a cheap laptop is all you need. https://t.co/qqkWJv…', 'id': 1394327872483958791, 'Usr_loc': 'Global Worldwide', 'hashtags': []}
{'text': 'RT @hallamohieddeen: Morning all, just a reminder that our Gaza offices were bombed and destroyed 2 days ago. Israel has yet to provide any…', 'id': 1394327872496574467, 'Usr_loc': 'Mumbai', 'hashtags': []}
{'text': "@repmarkpocan Duh. Maybe that's all the funding needed.", 'id': 1394327872509300740, 'Usr_loc': 'Cheese Country-GladTradCath', 'hashtags': []}
{'text': 'Be careful who y’all have kids with 🥴some of these bitches are some birds! ESPECIALLY to the good fathers', 'id': 1394327872622534659, 'Usr_loc': None, 'hashtags': []}
{'text': 'RT @_LovelyShihani: Worst thing about being First Gen. in America is that you’ll not have absolutely any guidance, no one to look up to but…', 'id': 1394327872605671427, 'Usr_loc': None, 'hashtags': []}
{'text': 'RT @VitalikButerin: @CyborgHumanism Out of all the replies, this may be the strangest. Your *twitter handle* is "cyborg humanism", but when…', 'id': 1394327872526028801, 'Usr_loc': 'Hrvatska', 'hashtags': []}
{'text': 'RT @sapnapalt: goodnight guys I love you all', 'id': 1394327872551129096, 'Usr_loc': 'Genderfluid|Pandastwt  ', 'hashtags': []}
{'text': 'RT @MIKE_MEHR: she had a whole ass 90+ years to make more friends this is her own fault', 'id': 1394327872505012227, 'Usr_loc': None, 'hashtags': []}
{'text': 'I haven’t had many insults said to me but you’re honestly such an inspiration to us all, especially with your caree… https://t.co/ex19ScRzJy', 'id': 1394327872450580484, 'Usr_loc': 'London, England', 'hashtags': []}
{'text': 'RT @ashleyskyes: Had a pic of your bitch in my catholic school locker, kissing all the girls in the back of the chapel, I’m so sorry, mama,…', 'id': 1394327872706318339, 'Usr_loc': None, 'hashtags': []}
{'text': 'RT @sandeep64074747: @CAITIndia\n@FederationOfVM\n@AIFTPINDIA\n@NeeleshTax\n@aitwa\n@aimtpa\nSave Dealers,Tax Professionals and represent before…', 'id': 1394327872743952386, 'Usr_loc': None, 'hashtags': []}
{'text': 'When one of us can move, we all can move  sparkles \n\nFor the first time in history, @Toyota will offer sponsorship opportuni… https://t.co/6jTTkvfYLT', 'id': 1394327872068886528, 'Usr_loc': None, 'hashtags': []}
{'text': 'RT @TimeyinFreedom1: I Am All Girls 2021\n\nInspired by true events, a relentless detective finds common ground with a systematic killer targ…', 'id': 1394327872798527489, 'Usr_loc': 'Rivers, Nigeria', 'hashtags': []}
{'text': "The gender equality &amp; equity discussion going on today is getting the best and the worst of y'all participating concurrently.", 'id': 1394327872916140040, 'Usr_loc': 'Tanzania', 'hashtags': []}
{'text': 'RT @gdmukherjee: @Dipankar_cpiml When I ask people here in Bengal \n(rural &amp; semi-urban) whether they know about YOU , @CpimlWestBengal ,@jd…', 'id': 1394327872878223366, 'Usr_loc': None, 'hashtags': []}
{'text': 'RT @Blade_and_Quill: Learn how to create a vector image for free using Krita.  It is a step-by-step tutorial that focuses on all the basic…', 'id': 1394327872727359488, 'Usr_loc': 'Occupied Muscogee (Creek) Land', 'hashtags': []}
{'text': 'RT @SurpriseWitnes: If y’all knew how much @britneyspears was actually worth, you’d be more horrified than you are now. $55millionbis laugh…', 'id': 1394327872878399491, 'Usr_loc': 'hell', 'hashtags': []}
{'text': 'RT @MypolicemanU: May 17th is the International Day against Homophobia, Transphobia and Biphobia. We support equal rights for all. Love is…', 'id': 1394327872895074307, 'Usr_loc': 'no stunts', 'hashtags': []}
{'text': '@Thrillh0us3 I was just speaking from experience.\n\nI’ve been doing the ground work advocacy since 96’ when all my m… https://t.co/48BhYnyYXc', 'id': 1394327872886607873, 'Usr_loc': 'Endocrominas V', 'hashtags': []}
{'text': 'You’re not supposed to use ANY essential oil without heavily diluting it with a carrier oil or glycerin. Just an FY… https://t.co/FHRMJy9BeI', 'id': 1394327872844845060, 'Usr_loc': 'CashApp: $FowlAzule', 'hashtags': []}
{'text': 'RT @Farda_Alphonso: He got to do me first to show me he’s all business.', 'id': 1394327872991604739, 'Usr_loc': 'Chicago, IL', 'hashtags': []}
{'text': 'RT @GauSevaAgniveer: . @agniveer-Pranin team got informed at night about an injured Gauvansh. Team went and got the treatment done. Naman t…', 'id': 1394327873125699584, 'Usr_loc': 'Bombay', 'hashtags': []}
{'text': "Y'all could probably see my internet being full loaded so pretty much an attack", 'id': 1394327873108930562, 'Usr_loc': '🇲🇾 Malaysia', 'hashtags': []}
{'text': "RT @hula_dennis: Get ready because what is coming to us from our Queen somewhat y'all are gonna be be proud and say wow.\nERICA IS COMING\n#E…", 'id': 1394327873180377091, 'Usr_loc': None, 'hashtags': []}
{'text': "So basically this first part\n\nYou can't control what Fans like/dislike and expect them to follow along(especially w… https://t.co/IeNp8iQq32", 'id': 1394327872756715521, 'Usr_loc': 'United States', 'hashtags': []}
{'text': "RT @bbrightloops: See what happened if our priority is to make bright happy 🥺 we're so united today  loudly_crying_face  Thank you everyone! All the best for…", 'id': 1394327873276682240, 'Usr_loc': None, 'hashtags': []}
{'text': '// not at all', 'id': 1394327876061827072, 'Usr_loc': 'He/They/Xe/It/Star/Bun', 'hashtags': []}
{'text': 'RT @jeffreyatucker: People always ask me "but what about India?" This one chart is worth more than all media reports. https://t.co/NxZEKWtA…', 'id': 1394327876229468161, 'Usr_loc': None, 'hashtags': []}
{'text': 'RT @waymoflydenuu: The funniest part is he be having proof lmao', 'id': 1394327876221251591, 'Usr_loc': '“Lets get it 🤪” -Jungkook', 'hashtags': []}
{'text': '@GoraniNekishon @TMZ Come again ufo been spotted all over the world mostly in the foreign countries', 'id': 1394327876246376449, 'Usr_loc': None, 'hashtags': []}
{'text': 'RT @romeotwink: for all my TikTok friends🤪 peach  https://t.co/LiM09ZFtiP', 'id': 1394327876292464642, 'Usr_loc': 'İstanbul, Türkiye', 'hashtags': []}
{'text': "The hypocrisy for me. They all have got agenda but now they can't accept the fact that it is now failing. \nThe sout… https://t.co/2dlNN9vXKL", 'id': 1394327876032475142, 'Usr_loc': 'Port Harcourt.', 'hashtags': []}
{'text': 'Im not doing all this shit because of bf ke apa. Tapi sebab beban hidup. Stress overload. Family problem. Study. Fr… https://t.co/pAxBOG3oLF', 'id': 1394327876443402242, 'Usr_loc': None, 'hashtags': []}
{'text': '@ludovicomaraj y’all confusing me… y’all saying we are projected to debut at 29k pure sales but we have 29k rn at the same time?', 'id': 1394327876447571970, 'Usr_loc': 'woonation', 'hashtags': []}
{'text': "RT @AaronOKelley: If you're vaccinated but worried you could still get infected by the unvaccinated, then you must apply that same logic to…", 'id': 1394327876477063175, 'Usr_loc': None, 'hashtags': []}
{'text': 'RT @Farda_Alphonso: He got to do me first to show me he’s all business.', 'id': 1394327876472819712, 'Usr_loc': 'Learning ', 'hashtags': []}
{'text': "@jenliet the media doesn't know BTS at all  loudly_crying_face ", 'id': 1394327876544176135, 'Usr_loc': 'TS · PM · OR', 'hashtags': []}
{'text': 'RT @ArtCrunchy: Boycott:\nKFC, McDonalds, Coca Cola,\nCosta, Starbucks, Pepsi\nAll US Corps.\nAll Tory Donors/Brexiters\nWetherspoons, Heck, War…', 'id': 1394327876669898752, 'Usr_loc': None, 'hashtags': []}
{'text': 'another day another heartbreak. this is how it is for jealoustwt. we live, we hurt, we cry, and no one cares. our s… https://t.co/gvjTS27YYc', 'id': 1394327876665810946, 'Usr_loc': 'HE / THEY • black mexican', 'hashtags': []}
{'text': '@LFCVegas My theory is this Pandemic is getting us ready for something. The vaccine is to stop us all dying of some… https://t.co/QMu2hzCWvX', 'id': 1394327876527394818, 'Usr_loc': 'Bristol, England', 'hashtags': []}
{'text': "RT @kezia_noble: A few weeks ago the media was obsessed with 'wave' in Brazil. Suddenly, it all stopped. Nobody thought this was a little s…", 'id': 1394327876812644361, 'Usr_loc': None, 'hashtags': []}
{'text': 'I think of this daily and appreciate my real life circumstances', 'id': 1394327876686782464, 'Usr_loc': 'ETX', 'hashtags': []}
{'text': '@koostinyy The thing i stop doing after getting all the clips is cutting them to make it match the beat of the song… https://t.co/VyCu4NmfsX', 'id': 1394327876858650626, 'Usr_loc': 'they vae ', 'hashtags': []}
{'text': 'RT @DallasTexasTV: Y’all thought Dallaska was bad, Welcome to the Dalific Ocean and it’s only day one https://t.co/VSwxO5M6Bj', 'id': 1394327877068509185, 'Usr_loc': 'Dallas, TX', 'hashtags': []}
{'text': 'We follow all the likes and retweets asap🪔', 'id': 1394327877089472513, 'Usr_loc': 'Kenya', 'hashtags': []}
{'text': 'RT @TheAdultMoods: mood all summer long https://t.co/QFBLEbNlCP', 'id': 1394327877152350215, 'Usr_loc': None, 'hashtags': []}
{'text': 'RT @xfollowersmx: Follow all who likes and Retweets this kiss_mark  kiss_mark  kiss_mark  kiss_mark  kiss_mark  red_heart ️', 'id': 1394327877282373638, 'Usr_loc': '❤', 'hashtags': []}
{'text': '@Z0mbieD0g11 @PinkNews All, I mean ALL God-Believing true Religions condemn and forbid LGBTQ as decreed by God- Our… https://t.co/IbNdCPLzOu', 'id': 1394327877160640518, 'Usr_loc': 'Worldwide', 'hashtags': []}
{'text': 'Congratulations to British Latinx poet and Nuevo Sol writer @Maia_Elsner whose debut collection will be published b… https://t.co/lUFEcFEuXX', 'id': 1394327876976132097, 'Usr_loc': 'London', 'hashtags': []}
{'text': 'RT @AravindhBala90: @sandhyaravishan Rela Redhills had asked all the O2 patients to shift out including critical ones in ventilator. They d…', 'id': 1394327877370322947, 'Usr_loc': None, 'hashtags': []}
{'text': 'they tried but it was a big ass fail', 'id': 1394327877206908936, 'Usr_loc': 'they/them', 'hashtags': []}
{'text': 'RT @k_artig: If you voted for Joe Biden, you are complicit in all the atrocities he’s committing. This is what happens when you choose the…', 'id': 1394327877206921217, 'Usr_loc': "ι'м ωнєяєνєя тнє тяυтн ℓιєѕ‼️", 'hashtags': []}
{'text': "@Dogger94 No not at all. If it was normal times I'd be working for the sens and I'd get to watch lol but not these days", 'id': 1394327877311733762, 'Usr_loc': 'Belleville', 'hashtags': []}
{'text': "RT @EXOPublicity: ( thread ) FANBASES DEALS THAT ARE ABOUT TO END Due to time limit bur didn't reach the goal of likes. So we need all EXOL…", 'id': 1394327877408071681, 'Usr_loc': '🇵🇭', 'hashtags': []}
{'text': 'RT @FAUCoachMac: As we finished our home schedule today with a win, I want to thank all the fans that supported us all year. I appreciate y…', 'id': 1394327877374681092, 'Usr_loc': None, 'hashtags': []}
{'text': 'RT @petedil: @normAL219 @PatWilliams1944 @BorisJohnson @pritipatel Still they sit on their hands , they want this and the violence which en…', 'id': 1394327877466927106, 'Usr_loc': None, 'hashtags': []}
{'text': '@sbjsbd @A_S12 The ratio pretty much proves that this is not what fans want at all. But NASCAR will come up with a… https://t.co/a2aQoHiIpU', 'id': 1394327877450178560, 'Usr_loc': None, 'hashtags': []}
{'text': 'RT @2Jayywho: ...Just a sample of the REAL preview to come with me &amp;&amp; @lulclapclap  smiling_face_with_horns  sweat_droplets  clapping_hands  medium-dark_skin_tone  we have so much in store of y’all  movie_camera   fire  https://t.co/…', 'id': 1394327877529870337, 'Usr_loc': None, 'hashtags': []}
{'text': 'RT @jhsIevi: i just think that they adore and love with hobi than all of us. https://t.co/Q3JyUTgLoc', 'id': 1394327877584252932, 'Usr_loc': None, 'hashtags': []}
{'text': '@9liberal @ProjectLincoln @mattgaetz This gif is excellent all-purpose', 'id': 1394327877563281416, 'Usr_loc': 'Burbank, CA', 'hashtags': []}
{'text': 'RT @870South: People will cry all day about protecting the 2nd Amendment and simultaneously support violating the 1st Amendment when it aff…', 'id': 1394327877613756420, 'Usr_loc': None, 'hashtags': []}
{'text': 'My all ADA S ON STAKING POOL', 'id': 1394327877789888517, 'Usr_loc': 'Türkiye', 'hashtags': []}
{'text': '@SViper72 Me too. All day.', 'id': 1394327877626236935, 'Usr_loc': None, 'hashtags': []}
{'text': "RT @clingyhq: i feel like wilbur's boundary about not talking too much about what he does while he's offline should apply to all streamers…", 'id': 1394327877739556867, 'Usr_loc': 'they/she + carrd • bootwt ', 'hashtags': []}
{'text': 'Fantastic news  green_heart  green_heart ', 'id': 1394327877613592580, 'Usr_loc': 'Lots of Sun, USA', 'hashtags': []}
{'text': 'RT @BB_13AYAAN: New Instagram Story @ishehnaaz_gill ..\nLangar Sewa We All Proud Of You Shehnaaz Gill Keep Doing Your Beautiful Work God Ble…', 'id': 1394327877831757831, 'Usr_loc': None, 'hashtags': []}
{'text': 'RT @_ambitious_12: Bruh do y’all not understand how hard this is?? Legendary  loudly_crying_face ', 'id': 1394327877655703556, 'Usr_loc': 'ea$t. ', 'hashtags': []}
{'text': "I would love to party with y'all- as long as everyone is comfortable with me locking myself in the bathroom for sho… https://t.co/uz2dsIkMFf", 'id': 1394327877873713154, 'Usr_loc': 'St. Lizardsburg', 'hashtags': []}
{'text': '@jkcurls We all know that all the judges are Latinas and even the hosts so what do we expect?', 'id': 1394327880205705220, 'Usr_loc': None, 'hashtags': []}
{'text': '@crookedmedia Love that y’all put in the guests in advance! Gives us something to look forward to.', 'id': 1394327877982773248, 'Usr_loc': 'Warsaw, Poland', 'hashtags': []}
{'text': 'All that just for the Knicks to lose', 'id': 1394327880239353868, 'Usr_loc': 'Somewhere', 'hashtags': []}
{'text': 'RT @OfficialPLT: We can officially hug friends &amp; family today in the UK 🥺 This pandemic hasn’t been easy so we want to send you all *virtua…', 'id': 1394327880306511878, 'Usr_loc': 'Greenock, Scotland', 'hashtags': []}
{'text': 'RT @lastnightsnora: I’m the friend you can cancel on, it’s definitely ok I won’t be mad at all', 'id': 1394327880373526533, 'Usr_loc': 'Purdue University', 'hashtags': []}
{'text': 'RT @SleeperSlim:  nose  medium_skin_tone  y’all smell that? https://t.co/YmdjDdqoPG', 'id': 1394327880310697987, 'Usr_loc': 'Im where I need to be ', 'hashtags': []}
{'text': 'I don\'t know what is going anymore, all I\'m aware of these days is just "oh I\'m alive"? Great great.', 'id': 1394327880457457664, 'Usr_loc': 'Space Force', 'hashtags': []}
{'text': 'RT @ItalianForTrick: Just reminding everyone that Apple is a shit company that is actively leading the charge to ban all sexual content off…', 'id': 1394327880503492608, 'Usr_loc': 'Novato, CA', 'hashtags': []}
{'text': '@MoosecalacTim @wmsqc @sunlorrie @brianlilley @acoyne IT ALL depends on who they ask', 'id': 1394327880583184387, 'Usr_loc': None, 'hashtags': []}
{'text': '@ldog562 @JRubinBlogger All it would@have taken was a 2 sec search. 20 million military personnel died in WWII, not… https://t.co/wUxZG5gpTF', 'id': 1394327880465850368, 'Usr_loc': 'United States', 'hashtags': []}
{'text': 'RT @enhypenupdates: Our 4th Generation Hot Icon has once again left us all in awe. Was anyone prepared for THAT teaser?  fire  FEVER MV is comin…', 'id': 1394327880658685956, 'Usr_loc': 'Hồ Chí Minh, Việt Nam', 'hashtags': []}
{'text': "RT @luvyou3kbts: Indian armys you all better get ready to stream 5 times more this cb to save our spot #1 on Spotify, bc we'll be competing…", 'id': 1394327880688029698, 'Usr_loc': 'Bookssss! ', 'hashtags': []}
{'text': "@LizGamesAnime @xarioes that's all politicians", 'id': 1394327880847462407, 'Usr_loc': "Jerry Garcia's", 'hashtags': []}
{'text': 'RT @adgpi: Sector Commanders &amp; Divisional HQ are in touch with District Collectors &amp; the Revenue Commissioner who is the nodal agency for R…', 'id': 1394327880964874248, 'Usr_loc': 'मुंबई, भारत', 'hashtags': []}
{'text': "RT @michaelharriot: Y'all seen this? https://t.co/EANM3Z9aYB", 'id': 1394327880927256576, 'Usr_loc': 'Chapel Hill, NC', 'hashtags': []}
{'text': "Sometimes people don't see, I'm all alone when thesr things happen. \n\nI'm scared. But I know in order for things to… https://t.co/hjpGHk2ezX", 'id': 1394327880973357058, 'Usr_loc': None, 'hashtags': []}
{'text': "@RicHassani I'm not fine at all. How are you?", 'id': 1394327881095028736, 'Usr_loc': 'Nigeria', 'hashtags': []}
{'text': '@LCharlesW Y’all are beyond disrespectful. Next time allllll of ya can walk  face_with_tears_of_joy ', 'id': 1394327881141080068, 'Usr_loc': None, 'hashtags': []}
{'text': '@xoxoKaralee lol since I moved to PC I feel kinda the same.\nEverytime I play I play alone or go into lfg, but not h… https://t.co/J8MXEk8SI1', 'id': 1394327881065631750, 'Usr_loc': None, 'hashtags': []}
{'text': 'seems that Republicans all over America are having a complete meltdown. \n\nThey can’t seem to keep up with their own… https://t.co/ZeMpkke4jR', 'id': 1394327881149390854, 'Usr_loc': 'Fresno / Los Angeles ', 'hashtags': []}
{'text': 'RT @dkboutyou: KISSES WITH KINGOFTALK', 'id': 1394327880994234375, 'Usr_loc': 'Republic of the Philippines', 'hashtags': []}
{'text': '@_aprilgloria 1) The car is a sniper rifle. You can aim and zoom. Knowing that will make all the driving sequences much easier.', 'id': 1394327881237467137, 'Usr_loc': 'California, USA', 'hashtags': []}
{'text': 'Poison Mushroom Cookie would be mistaken for an actual mushroom in the past, but they were never angry, never at al… https://t.co/SLAJ8mz0zG', 'id': 1394327881199857672, 'Usr_loc': 'Island of Memories', 'hashtags': []}
{'text': 'RT @thiacyn6: I need 300 retweets to win this🥺 heart_suit ️. Kindly retweet for me folded_hands  https://t.co/NaLza0bhrx', 'id': 1394327881178828800, 'Usr_loc': 'Kampala, Uganda', 'hashtags': []}
{'text': 'WFT all-time sacks leader Kerrigan joins\xa0Eagles https://t.co/igj8fEFfDg', 'id': 1394327881258577920, 'Usr_loc': 'New York City', 'hashtags': []}
{'text': 'RT @sof1azara03: Wow!  face_screaming_in_fear 1000 $FLUR holders in 2 days? Kudos to team FLUR!  clapping_hands  https://t.co/SoAjy6pofH', 'id': 1394327881212379137, 'Usr_loc': None, 'hashtags': []}
{'text': 'Every single one of these people are pigs.\n\nTraitors.\n\ntrumpers.\n\nI hate them all', 'id': 1394327881250127874, 'Usr_loc': None, 'hashtags': []}
{'text': 'RT @Farda_Alphonso: He got to do me first to show me he’s all business.', 'id': 1394327881250136064, 'Usr_loc': None, 'hashtags': []}
{'text': 'RT @WorldwideCarats: FRIDAY IS THE START OF TRACKING WEEK FOR BILLBOARD CHARTS. \n\nLET US GIVE OUR ALL SUPPORT FOR THEIR 8TH MINI ALBUM\n\nLET…', 'id': 1394327881463959553, 'Usr_loc': None, 'hashtags': []}
{'text': 'RT @da13thsun: These are Th So Call BLACK Spiral Head people who so call Anunaki/AnuNaga/ELOHYIM started using their Universal Creators DNA…', 'id': 1394327881547984898, 'Usr_loc': 'Muu/Florida, USA', 'hashtags': []}
{'text': '@nortyspawn @MarthaStewart @SnoopDogg I want to invite you to play this super relaxing and exciting  game with me. https://t.co/spBbUMwFRS', 'id': 1394327881430405123, 'Usr_loc': None, 'hashtags': []}
{'text': "@ViolenceObscene Take all the time you need, sir.. I'm just excited  face_with_tears_of_joy  I mean, just think.. After that, you will hav… https://t.co/yITnFDBRPY", 'id': 1394327881430405124, 'Usr_loc': 'Renton, WA', 'hashtags': []}
{'text': 'RT @imPVK94B: Most Sixes for India in all Formats\n\nRohit - 436 in 387 Matches\nDhoni - 359 in 538 Matches\nSachin - 264 in 664 Matches\nYuvraj…', 'id': 1394327881539493891, 'Usr_loc': None, 'hashtags': []}
{'text': 'RT @V_Palestine20: Remember, all of this is happening in Gaza amidst a global pandemic! The Israeli army is bombarding Gaza Strip non stop.…', 'id': 1394327881547927552, 'Usr_loc': None, 'hashtags': []}
{'text': 'Things that will obviously never happen in my life that always happen in bl "I accidentally bought 2 or 4 tickets"… https://t.co/B8uTVtBfy8', 'id': 1394327881619181569, 'Usr_loc': 'Johore, Malaysia', 'hashtags': []}
{'text': "Bomb Rain All Over Town \n\nDay And Night Have Changed \n\nFor People Who Do Not Know The Dawn \n\nLet's Unite To Give Vo… https://t.co/vlg1nseWZ6", 'id': 1394327881740734466, 'Usr_loc': None, 'hashtags': []}
{'text': 'RT @myworld2121: Hugs are great.... one size fits all !! dog_face 🧒 medium-light_skin_tone  hugging_face \n\n( retrieverpuppies | Ig ) https://t.co/tpSbgyxR2Y', 'id': 1394327881732530178, 'Usr_loc': 'Il mio cuore è nelle Dolomiti', 'hashtags': []}
{'text': 'RT @iFireMonkey:  bell  DING DING, LEVEL CHECK bell \n\nWith Season 7 right around the corner, what level are you, and what do you plan to reach by the…', 'id': 1394327881854054401, 'Usr_loc': 'Earth', 'hashtags': []}
{'text': 'RT @atani_mr: All tertiary institutions in Nigeria &amp; federal government ministries benefited from this local vehicle production including i…', 'id': 1394327881950580738, 'Usr_loc': 'Lagos, Nigeria ', 'hashtags': []}
{'text': 'RT @theeashcamille: I’ve accomplished so much in life by the age 27. I can’t wait to see all my other dreams come true. It’s only up from h…', 'id': 1394327881850003461, 'Usr_loc': None, 'hashtags': []}
{'text': "RT @Powamowinstarot: Fire signs  Aries  Leo  Sagittarius  ALL placements  crystal_ball \nI see you very focused on you and your finances! You're done dealing with people that…", 'id': 1394327881912836099, 'Usr_loc': 'Belleville,MI', 'hashtags': []}
{'text': 'RT @ComicDaveSmith: Any apologies from the covid hysterics who predicted disaster when TX ended all of the restrictions?', 'id': 1394327881879232516, 'Usr_loc': None, 'hashtags': []}
{'text': 'RT @AmandaDannielle: Sorry I care about the world :(', 'id': 1394327881958965255, 'Usr_loc': 'Anywhere, USA', 'hashtags': []}
{'text': 'RT @tonyatthehop: All hand pulled ales today £3 per pint!  grinning_face  https://t.co/uEpUJQaPbh', 'id': 1394327884546945024, 'Usr_loc': 'Hull and East Yorkshire', 'hashtags': []}
{'text': 'RT @ggreenwald: By comparison, the YouTube show Rising with @krystalball &amp; @esaagar gets roughly 1 million viewers a day -- almost all in t…', 'id': 1394327884483817473, 'Usr_loc': 'Contrary land', 'hashtags': []}
{'text': "RT @Sweetnightwings: @_luvstxt The hardest part the special part that y'all don't get it is that park jimin paved the way", 'id': 1394327884588748802, 'Usr_loc': None, 'hashtags': []}
{'text': "@SnoozeActive Maybe it's about time we all acknowledged that the guy behind 'Love Gun' and 'Lick It Up' might have… https://t.co/AO6BQitHXP", 'id': 1394327884370780162, 'Usr_loc': 'London', 'hashtags': []}
{'text': 'RT @MacFarlaneNews: As we reported w/ @ChrisJansing @AymanMSNBC on Friday.... nearly all federal criminal cases end in plea agreements.   T…', 'id': 1394327884580458496, 'Usr_loc': 'Upstate NY', 'hashtags': []}
{'text': 'It’s both.. depending on the environment', 'id': 1394327884513284102, 'Usr_loc': 'Little Rock, AR', 'hashtags': []}
{'text': 'RT @mcuban: Things to know about all markets.  Buying on Margin giveth, Margin Calls taketh away even more, faster.  Rumors giveth. News ta…', 'id': 1394327884630724610, 'Usr_loc': 'Princeton, TX', 'hashtags': []}
{'text': 'I asked my mom to buy me snacks and she got me all of my favorite childhood cookies and cakes :,) and last week I h… https://t.co/wIgRhHWBvY', 'id': 1394327884500807680, 'Usr_loc': 'Pronouns: pup • puppi', 'hashtags': []}
{'text': 'RT @CorporalBen: Since those of us that don\'t wear the Mask of\n\n Submission and haven\'t gotten a "Shot" yet, shouldn\'t we all be dead by no…', 'id': 1394327884546838531, 'Usr_loc': 'USA', 'hashtags': []}
{'text': 'Who’s partying with us on next years @ShipRocked 🥳\nCan’t wait to get seasick with y’all\n 🤟 medium-light_skin_tone  nauseated_face 🤟 medium-light_skin_tone  https://t.co/oJYdhen8fq', 'id': 1394327884316221445, 'Usr_loc': 'New York, NY, USA', 'hashtags': []}
{'text': 'RT @Farda_Alphonso: He got to do me first to show me he’s all business.', 'id': 1394327884748279817, 'Usr_loc': 'Ohio', 'hashtags': []}
{'text': 'RT @LimestoneDSB: Today is intended to draw attention to the violence &amp; discrimination experienced by lesbian, gay, bisexuals, transgender,…', 'id': 1394327884895039496, 'Usr_loc': None, 'hashtags': []}
{'text': 'There was a time when we were competing with the world to have best of doctors, engg and scientists. Now it all abo… https://t.co/B3jqGQo8TV', 'id': 1394327884664168451, 'Usr_loc': 'Noida, India', 'hashtags': []}
{'text': "@hhwyfe Or this one? This one fluctuates wildly. I watch them pretty often and it's not looking good for Conservati… https://t.co/uJ5sYJRRTr", 'id': 1394327884488187907, 'Usr_loc': None, 'hashtags': []}
{'text': 'RT @jonasabadilla: Better suggestion: Don’t call at all unless you messaged the person beforehand to ask permission for a call', 'id': 1394327884815212547, 'Usr_loc': None, 'hashtags': []}
{'text': 'RT @OalikaLovesLyn: I’m fr a top tier experience. I had NO business letting some of y’all experience this vibe', 'id': 1394327884878262283, 'Usr_loc': None, 'hashtags': []}
{'text': 'RT @CleveWatkiss: ...And here it is. All of this  black_heart  raising_hands  dark_skin_tone  clapping_hands  dark_skin_tone  folded_hands  dark_skin_tone  https://t.co/cyYuF1mkXm', 'id': 1394327884899262469, 'Usr_loc': None, 'hashtags': []}
{'text': "RT @Theserikigirl: To be very honess, I think I've exhausted all the love in me, na cruise remain", 'id': 1394327884899262466, 'Usr_loc': 'Ilorin, Nigeria', 'hashtags': []}
{'text': 'My G!!! Congrats homie!!!  fire  fire  fire ', 'id': 1394327884848844804, 'Usr_loc': 'Parts Unknown', 'hashtags': []}
{'text': '@CFCPys The players should be all business https://t.co/ygDNxpSh2z', 'id': 1394327884630736904, 'Usr_loc': None, 'hashtags': []}
{'text': "i have brown muslim parents we can't even say the word sex in this household", 'id': 1394327884899180545, 'Usr_loc': '17 | she/her', 'hashtags': []}
{'text': 'RT @QuezRene: Sexually transmitted depression', 'id': 1394327884777541632, 'Usr_loc': None, 'hashtags': []}
{'text': 'RT @Natashadsays: I bet we can all tell of someone whose had awful outcome from jib jab-', 'id': 1394327884953788424, 'Usr_loc': None, 'hashtags': []}
{'text': 'RT @wonucarto: also scoups: June is ours~\n\nBEST LEADER AND FATHER SKJKKJSHHDGS', 'id': 1394327885033263105, 'Usr_loc': '˗ˏˋ rcbyf ! 4TEEN ˎˊ˗', 'hashtags': []}
{'text': '@theAliceRoberts Omg, have you seen the figures for the last week Alice. Most sane scientists who are not looking f… https://t.co/gkhi4s6t36', 'id': 1394327884962189312, 'Usr_loc': 'Bristol', 'hashtags': []}
{'text': "RT @01Btsxarmy:  loudspeaker  Please cast your votes on the website now as we don't know our stats there.\n\n round_pushpin Use all your Twitter &amp; Facebook accounts to…", 'id': 1394327885075394572, 'Usr_loc': None, 'hashtags': []}
{'text': 'RT @ShehnaazShineFC:  folded_hands  medium-light_skin_tone  red_heart ️ folded_hands  medium-light_skin_tone \nSpread the word.\n\nHope the help reaches to needy folded_hands  medium-light_skin_tone \nGod Bless Us All in this tough times.\n@ishehnaaz_gill #Shehn…', 'id': 1394327885226381314, 'Usr_loc': None, 'hashtags': []}
{'text': 'RT @intoblackwaters: I pray to have a healthy family all under one roof.', 'id': 1394327885184389124, 'Usr_loc': 'Hempstead, TX', 'hashtags': []}
{'text': 'RT @chikaural: all black !!!!!!!!!! because i’m indecisive :D  black_heart  https://t.co/it7UmlwYAt', 'id': 1394327885209550852, 'Usr_loc': 'France', 'hashtags': []}
{'text': "RT @bleuyi: if y'all could share this that would be appreciated, along with the insta post i'm boutta put below", 'id': 1394327885230510081, 'Usr_loc': '19 ', 'hashtags': []}
{'text': 'RT @Kai_Texel: Resident Evil animal crossing villagers (so far)\nI shouldn’t have drawn all my faves first!! https://t.co/oKLboFMxTu', 'id': 1394327885318660096, 'Usr_loc': "would'nt you like to know wheather boi", 'hashtags': []}
{'text': 'RT @GNev2: Please see an Open Joint Letter \nhttps://t.co/O3eHaOJecN\n\nPlease sign &amp; share the petition to help create a fairer football for…', 'id': 1394327885503156232, 'Usr_loc': None, 'hashtags': []}
{'text': 'RT @BooNon_98: Twice : Taste of Love\nMonsta X : Flavors of Love\nSeventeen : Power of Love\n\nJune month is all about Love two_hearts  two_hearts  two_hearts  two_hearts !!!!', 'id': 1394327885511479298, 'Usr_loc': None, 'hashtags': []}
{'text': 'RT @Hanumavihari: DM me if not yet fulfilled', 'id': 1394327885490442240, 'Usr_loc': 'Hyderabad, India', 'hashtags': []}
{'text': 'RT @WalsallHcareNHS: Today is International Day Against Homophobia, Transphobia and Biphobia  white_flag ️\u200d rainbow \n\nThis year’s theme is “Together: Resistin…', 'id': 1394327885465497604, 'Usr_loc': 'England, United Kingdom', 'hashtags': []}
{'text': '@Tekayo63 @SonicLorepost I bet the Commander knows how to grill like a pro, it was probably a wonderful time all around', 'id': 1394327885566074883, 'Usr_loc': 'ryanrudnick0215@gmail.com', 'hashtags': []}
{'text': "RT @gee3ka: Rt if you've been in a dps \n{Can't believe I've only been in dps and ganga house all my life??? } https://t.co/CgqTBD1JXe", 'id': 1394327885473714178, 'Usr_loc': None, 'hashtags': []}
{'text': 'On another note, thank you to all of our supporters in the social media spaces, especially the @Twitter space  folded_hands  medium_skin_tone  Lo… https://t.co/jKpeES3yBO', 'id': 1394327885511630850, 'Usr_loc': 'New York, NY', 'hashtags': []}
{'text': 'RT @nalvasouzavitor: We all need this. 🥰 https://t.co/jYoahXiO4C', 'id': 1394327885561880579, 'Usr_loc': 'Somewhere in Merseyside. ', 'hashtags': []}
{'text': 'Some people found theirselves during quarantine, some people found out they were racist all along 🤫 which are you hugging_face ', 'id': 1394327885687762951, 'Usr_loc': 'they/them', 'hashtags': []}
{'text': 'If I could just quit my job and have sex all day I would idgaf  rolling_on_the_floor_laughing ', 'id': 1394327885717118980, 'Usr_loc': 'In your mind 🤍', 'hashtags': []}
{'text': 'RT @devo_rak: |NSFW|\nKatsuki feels so full - heart bursting at the seams, head fuzzy with want, hips holding so much pressure... His eyes s…', 'id': 1394327885675171841, 'Usr_loc': 'nsfw ', 'hashtags': []}
{'text': 'RT @CherieMinu: Please check bank statement of all these peoples: Sharam beer, Mum police present at crime scence on 14th June, 5 doctors,…', 'id': 1394327885771526146, 'Usr_loc': 'India', 'hashtags': []}
{'text': '@VikingNation28 I’m not rooting for Kirk to fail in the least. Exactly the opposite.  If Mond can be the inspiratio… https://t.co/j8F2eiA2Tl', 'id': 1394327885670871043, 'Usr_loc': None, 'hashtags': []}
{'text': "wait y'all didn't have morals in the first place skull ", 'id': 1394327888640372736, 'Usr_loc': 'ultsINFINITE_HOYA', 'hashtags': []}
{'text': 'RT @editsuperm: the top 3 male kpop dancers of all time ♡ https://t.co/zVr47jy63C', 'id': 1394327888686567426, 'Usr_loc': None, 'hashtags': []}
{'text': '@AngieSeams Sure wasn’t mentally prepared for those shopping trips at all!', 'id': 1394327888766377986, 'Usr_loc': 'Infinity and Beyond', 'hashtags': []}
{'text': "RT @T4Recovery:  backhand_index_pointing_down Reminder:\n right_arrow ️ Texas dropped ALL Covid restrictions and mask mandates over 2 months ago\n right_arrow ️ Joe Biden called it 'Neanderthal…", 'id': 1394327888653062157, 'Usr_loc': None, 'hashtags': []}
{'text': 'RT @annecurtissmith: Before the day ends, just wanted congratulate and thank @rabiyamatteo for giving her all representing the 🇵🇭 at this y…', 'id': 1394327888883683337, 'Usr_loc': 'Philippines', 'hashtags': []}
{'text': 'RT @EXOPublicity: This is also close to get end. 10k likes needed @weareoneEXO \n\nhttps://t.co/Ac1IrgGwfw', 'id': 1394327888653176834, 'Usr_loc': 'Oran, Algeria', 'hashtags': []}
{'text': 'RT @kekeysl: money be buying my happiness, ion know bout y’all  loudly_crying_face .', 'id': 1394327888867037189, 'Usr_loc': None, 'hashtags': []}
{'text': 'Christ and the way some of these scousers go on you’d think they’d won all 24 actually  person_facepalming  light_skin_tone \u200d male_sign ️ Arsenal and Utd having… https://t.co/FTV3IoajiH', 'id': 1394327888820908034, 'Usr_loc': 'Rugby, England', 'hashtags': []}
{'text': 'RT @INeetuDabas: PM @narendramodi ji is working Day and Night to keep India safe, to keep us safe\n\nHe is ensuring\n◆By Dec2021, production o…', 'id': 1394327888980152320, 'Usr_loc': None, 'hashtags': []}
{'text': "@JGiesige @GarretWATO @SassyFNP So I understand clearly..Christians worship a god who things they aren't good enoug… https://t.co/tVdG0ezHTs", 'id': 1394327888862777358, 'Usr_loc': 'Ohio, USA', 'hashtags': []}
{'text': 'RT @BefittingFacts: Fair point! As a public servant you are bound to help every needy. So how many people got help from him? To reduce ur r…', 'id': 1394327888812408834, 'Usr_loc': None, 'hashtags': []}
{'text': '@seokjnner this was my first lockscreen i had of bts and mane i was going thru it all', 'id': 1394327889097678856, 'Usr_loc': '16 / blasian / OT7', 'hashtags': []}
{'text': "RT @cryystal_t: We've celebrated your first smile, your first giggle, your first step, and now, we get to celebrate the biggest first of al…", 'id': 1394327889189822464, 'Usr_loc': None, 'hashtags': []}
{'text': "Alright. More lady D vampire ass for y'all. \nCurious what part of Dimitrescu's dumptruck the crop will like. https://t.co/uJckCeYiiH", 'id': 1394327888523005956, 'Usr_loc': None, 'hashtags': []}
{'text': 'RT @_dnxw: i used to be the “chaser” in all of my friendships &amp; relationships.. literally begging for reciprocation and to be treated corre…', 'id': 1394327889261187074, 'Usr_loc': None, 'hashtags': []}
{'text': 'RT @MeidasTouch: The radicalization of the Republican Party should terrify us all. Our democracy hangs in the balance in 2022.\n\n writing_hand ️ @deAdder…', 'id': 1394327889202528262, 'Usr_loc': None, 'hashtags': []}
{'text': 'RT @SabeehaMajid: England won the world cup fair and square. As bitter as we all were, they won it as all teams agreed to the rules. Yes th…', 'id': 1394327889131229186, 'Usr_loc': 'United Kingdom', 'hashtags': []}
{'text': 'RT @HlebbyKe: Why are you yelling?  skull  https://t.co/uUVnrhPZIz', 'id': 1394327889227788291, 'Usr_loc': 'Chi Town ', 'hashtags': []}
{'text': 'Won’t t be mad but MONTY??!! THIBS!', 'id': 1394327889294802948, 'Usr_loc': 'Out My Mind', 'hashtags': []}
{'text': 'RT @RARE_LINKS_SALE: This is my all time favourite vid🥰 smiling_face_with_heart-eyes \nAnd she is most beautiful  red_heart ️\n@RARE_LINKS_SALE https://t.co/x10WzoalGa', 'id': 1394327889462583298, 'Usr_loc': None, 'hashtags': []}
{'text': 'i honestly had to listen the edited version that made the neos voice extra louder  loudly_crying_face ', 'id': 1394327889412165637, 'Usr_loc': 'she/her ; 18', 'hashtags': []}
{'text': "RT @tntj_e: Bomb Rain All Over Town \n\nDay And Night Have Changed \n\nFor People Who Do Not Know The Dawn \n\nLet's Unite To Give Voice\n\n#SaveGa…", 'id': 1394327889558966275, 'Usr_loc': 'Madurai South, India', 'hashtags': []}
{'text': 'RT @MeghanMcCain: We fought a war in 1776 so we don’t have to care what you say or think. \n\nThat being said, you have chosen to seek refuge…', 'id': 1394327889533882376, 'Usr_loc': 'Severna Park, MD', 'hashtags': []}
{'text': "@ScrewballSq It amuses my students though.  But they're all 5-6 years old.", 'id': 1394327889693188103, 'Usr_loc': 'The desert, CA', 'hashtags': []}
{'text': 'Muslim youth Asif from Mewat Haryana brutally murdered by hindutva goons.Asif is beaten by mob of 10-15 Goons.We de… https://t.co/mdrMlTyEw4', 'id': 1394327889626112013, 'Usr_loc': 'JAMMU AND KASHMIR🍁', 'hashtags': []}
{'text': '@CarmichaelDave Not sure why this is even a conversation.  He has done a tremendous job considering all the covid s… https://t.co/QBo5WnOCpN', 'id': 1394327889600925700, 'Usr_loc': 'Sacramento, CA ', 'hashtags': []}
{'text': 'RT @theeunknownn1_: New arrivals now available for purchase ! ALL items for $30 🤍 Shop with us https://t.co/LkGg6dxIey https://t.co/6Diqrnp…', 'id': 1394327889747890179, 'Usr_loc': None, 'hashtags': []}
{'text': 'Kwame Brown said y’all got the watches, I got the time.', 'id': 1394327889827532800, 'Usr_loc': 'Miami, FL', 'hashtags': []}
{'text': 'RT @RuthlessCooper: As per @KapilMishra_IND , central govt china ki dalal hai\nWel done KAPILWA\n\nRats started leaving the ship and we all kn…', 'id': 1394327889835806721, 'Usr_loc': None, 'hashtags': []}
{'text': 'The Most Scientifically Accurate Movies Of All Time | Answers With Joe https://t.co/VAiZ8Jhg66 via @YouTube', 'id': 1394327889751969793, 'Usr_loc': 'Raanana Israel', 'hashtags': []}
{'text': 'RT @jonasabadilla: Better suggestion: Don’t call at all unless you messaged the person beforehand to ask permission for a call https://t.co…', 'id': 1394327889840021506, 'Usr_loc': 'ca/pa', 'hashtags': []}
{'text': 'RT @iAMPudinz: y’all   be   like   “ taken  locked ”   bro  ..   i   know   how   to   pick   locks   loudly_crying_face  loudly_crying_face ', 'id': 1394327890150494209, 'Usr_loc': '16 she/her 𖤐🦇', 'hashtags': []}
{'text': "@Variety Black is beautiful black_heart Black Lives Matter raised_fist  medium-dark_skin_tone I can't stop,I won't stop speaking_head We are victims , My Son deserve all the b… https://t.co/HNeVIU06Gz", 'id': 1394327889986916352, 'Usr_loc': 'United States', 'hashtags': []}
{'text': 'RT @fowltown: That’s a wrap in Vancouver! Thank you to all the amazing cast/crew in this city... so much incredible talent helping make #So…', 'id': 1394327890154692608, 'Usr_loc': None, 'hashtags': []}
{'text': '@joeneal123 All the best Joe - once a U  yellow_heart  black_heart  yellow_heart  black_heart ', 'id': 1394327890137866245, 'Usr_loc': None, 'hashtags': []}
{'text': 'RT @BTSRainbowArmy: An article talking about breaking gender stereotypes, mentioning support for non-binary people, and all of that in Weve…', 'id': 1394327890221682690, 'Usr_loc': 'CA "NO🔞"', 'hashtags': []}
{'text': 'RT @SecRaimondo: Today, @AmbassadorTai, @VDombrovskis, and I announced the start of discussions to address global steel and aluminum excess…', 'id': 1394327890175488002, 'Usr_loc': 'Hong Kong', 'hashtags': []}
{'text': 'RT @ScottZILWarrior: I will send one random person $750 in 72hrs all you have to do is RT and be following myself &amp; @flurmoon \n\n$250 if joi…', 'id': 1394327890280423425, 'Usr_loc': 'East Java, Indonesia', 'hashtags': []}
{'text': 'RT @BasedSinceBirth: LMAOOOOO Joe a wild boy he bouta lose it all', 'id': 1394327890154729476, 'Usr_loc': 'Atlanta, GA', 'hashtags': []}
{'text': "@blkjam @breeerbx @Casey I know very little of Australia's economy... do you produce your own oil? I don't get how… https://t.co/UoBxQlbavT", 'id': 1394327890284761089, 'Usr_loc': 'Colorado Springs, CO', 'hashtags': []}
{'text': "@MotilalOswalLtd @MrMotilalOswal\nPlease don't send repeat message okey I think all are playing with me. Kindly do s… https://t.co/udGWj8JJ9A", 'id': 1394327890217422849, 'Usr_loc': 'Lucknow, India', 'hashtags': []}
{'text': 'Armed mufti were seen inspecting all the bypassing vehicles near Ubwar overpass bridge Mandalay.… https://t.co/ysYK7t8V5J', 'id': 1394327890083254275, 'Usr_loc': None, 'hashtags': []}
{'text': '@GoddessLyria I mean this with all due respect: i do too 🥰', 'id': 1394327892855771148, 'Usr_loc': 'Kent, OH', 'hashtags': []}
{'text': 'RT @BethRigby: "our joke borders policy" &gt; management of borders throughout the pandemic will be a big theme in the future Covid inquiry.', 'id': 1394327892776136705, 'Usr_loc': 'Africa, Scotland, Ireland', 'hashtags': []}
{'text': 'RT @aslavitt46: COVID Update: It appears that cases are down in all 50 states.', 'id': 1394327892818018305, 'Usr_loc': None, 'hashtags': []}
{'text': '@PeterMcCormack @elonmusk Dude why wouldn’t you just email him and save yourself and everyone else some time instea… https://t.co/VOjw3CTcOP', 'id': 1394327892662751238, 'Usr_loc': None, 'hashtags': []}
{'text': 'RT @Bang_Garr: $200 || 9200 PHP || 2,7 juta rupiah\n|| one winner || Garangan 12 ||\n\nRT, like, follow me and @omniestategroup\u2069\n\nGo to https:…', 'id': 1394327892910215171, 'Usr_loc': 'Indonesia', 'hashtags': []}
{'text': 'RT @IAmTheActualET: Midwest states with "Neanderthal thinking" that "opened too soon" by removing all COVID restrictions before March (red)…', 'id': 1394327892838977536, 'Usr_loc': 'Wyoming, USA', 'hashtags': []}
{'text': 'RT @SKefason: So far so good.\n\nMai barrows, Keke riders, okada riders, hawkers, students etc all joined the protest against dictatorship an…', 'id': 1394327892881035265, 'Usr_loc': None, 'hashtags': []}
{'text': '@anchorbabynotes The words of the one who created hell are sufficient. Just as long as you: 1) know you would go th… https://t.co/9h8fYbRAeO', 'id': 1394327892738387974, 'Usr_loc': 'USA', 'hashtags': []}
{'text': '@GeologyCharlie @climate Battery materials ok, but the lifting of all ships I question. Projects pushed back didn’t… https://t.co/0Ez6XG5cOR', 'id': 1394327892876738562, 'Usr_loc': None, 'hashtags': []}
{'text': 'Nite All', 'id': 1394327893031882753, 'Usr_loc': 'Di Batas Senja', 'hashtags': []}
{'text': 'RT @_D1POP: Naaaaaa soulja boy really invented everything  face_with_tears_of_joy  face_with_tears_of_joy  face_with_tears_of_joy  face_with_tears_of_joy  face_with_tears_of_joy  face_with_tears_of_joy  face_with_tears_of_joy  face_with_tears_of_joy  face_with_tears_of_joy ', 'id': 1394327892956532742, 'Usr_loc': None, 'hashtags': []}
{'text': 'RT @TXTOFFlCIAL: our biggest chance to give them wins on music shows is during the first week, the competition is definitely tough but ther…', 'id': 1394327893061238785, 'Usr_loc': None, 'hashtags': []}
{'text': 'We sent a message to  the Palestinian people: In your struggle for freedom, you will never be alone. Humanity peopl… https://t.co/E2D5kgZ9rO', 'id': 1394327893052821508, 'Usr_loc': None, 'hashtags': []}
{'text': 'RT @CleveWatkiss: ...And here it is. All of this  black_heart  raising_hands  dark_skin_tone  clapping_hands  dark_skin_tone  folded_hands  dark_skin_tone  https://t.co/cyYuF1mkXm', 'id': 1394327893157756932, 'Usr_loc': 'New Jersey, USA', 'hashtags': []}
{'text': 'What’s a good sports car that’s good on gas? I’m tired of seeing y’all drive SRT’s yall not original at all', 'id': 1394327893300420614, 'Usr_loc': 'Memphis, TN', 'hashtags': []}
{'text': '@omarali50 @KesariDhwaj She is leftist ,she wants politburo like body to rule India ,all her rants about Democracy,… https://t.co/CXv10Os6KC', 'id': 1394327893208027140, 'Usr_loc': 'India', 'hashtags': []}
{'text': 'Yeesh I know you are supposed to dilute it but what the hell!', 'id': 1394327893279399937, 'Usr_loc': 'Jupiter', 'hashtags': []}
{'text': 'RT @Mooniemaria: I feel like all my problems would be solved if i just lost 20 lbs', 'id': 1394327893426286596, 'Usr_loc': 'Paterson', 'hashtags': []}
{'text': '@LeviLewds All of them at the same time.', 'id': 1394327893463949315, 'Usr_loc': 'Breiðablik', 'hashtags': []}
{'text': '@Naija_PR YES, in all shades!', 'id': 1394327893560467459, 'Usr_loc': 'Lagos', 'hashtags': []}
{'text': '@hadersbarry @nbhdzoie @reddmoffat thanks for being the best gc even tho you all probably hate me but the fact that… https://t.co/X0mTXt280R', 'id': 1394327893166067723, 'Usr_loc': 'He⠀Rom⠀Cloud⠀⠀☻⠀', 'hashtags': []}
{'text': 'RT @marcosalvarado_: The biggest flex is turning all your wounds into wisdom.', 'id': 1394327893686333440, 'Usr_loc': None, 'hashtags': []}
{'text': '@HurdANoise @zackery_gray @mariofcainhurst @gerryconway Yes! Because when they complain it’s ok. But when men call… https://t.co/4OaKbyK0u6', 'id': 1394327893627572224, 'Usr_loc': None, 'hashtags': []}
{'text': 'RT @amberkgoodwin: Sorry not sorry in advance for all the law graduation photos y’all are about to get. I’m 41, never been married, have no…', 'id': 1394327893849825280, 'Usr_loc': 'in hell probably', 'hashtags': []}
{'text': 'RT @Tsietsi_Mohale: PPPFA, PFMA, MFMA, etc. All ANC policies that disadvantage SMMEs but their voters are saying its Stellenbosch or DA pol…', 'id': 1394327893715607566, 'Usr_loc': None, 'hashtags': []}
{'text': '@itsJAMminTime @Wallc49ers @Mariners Back in my day, we didn’t have this facetok and snapbook to distract us from t… https://t.co/ZCe2vZ5Ri9', 'id': 1394327893929467905, 'Usr_loc': None, 'hashtags': []}
{'text': "RT @bbearTaee: FINDING SMALL ACCOUNTS🥺\nFINDING SMALL ACCOUNTS🥺\nFINDING SMALL ACCOUNTS🥺\nFINDING SMALL ACCOUNTS🥺\n\nLIKE AND RT THIS LET'S ALL…", 'id': 1394327894063665153, 'Usr_loc': None, 'hashtags': []}
{'text': '@mamaBear426 @gerrydee @celliottability @OntarioPCParty That goes for all of them...the entire thing is a lie and n… https://t.co/R90N84HyKR', 'id': 1394327894013497348, 'Usr_loc': None, 'hashtags': []}
{'text': 'Can we just let her live her truth and pray for all the parties involved to get the help they need .', 'id': 1394327894172868611, 'Usr_loc': None, 'hashtags': []}
{'text': 'RT @Farda_Alphonso: He got to do me first to show me he’s all business.', 'id': 1394327894105657346, 'Usr_loc': None, 'hashtags': []}
{'text': "Which type are you ?? T-T I'm all of them on different days, my mood cycle is crazy \n\nAnyways @TXT_members I LOVE THESE OMG INSANE LY ALL &lt;3", 'id': 1394327894181093377, 'Usr_loc': 'she/her ★ 16 ', 'hashtags': []}
{'text': 'RT @blessadj: Bro. After all these years I was just clicking for luck https://t.co/lBf0Y7dVHZ', 'id': 1394327894214815748, 'Usr_loc': 'Delaware, USA', 'hashtags': []}
{'text': 'RT @official_axM: @stoolpresidente $PUSSY is a true project not like all other shit coins. We have good news coming in, and the token has b…', 'id': 1394327894239809541, 'Usr_loc': None, 'hashtags': []}
{'text': 'I think my church used to do a whole month back in the day  persevering_face ', 'id': 1394327894218915846, 'Usr_loc': None, 'hashtags': []}
{'text': "RT @SusanStJames3_: Dr Fauci now says the pandemic proves systemic racism. When you're all out of cards, play the race card. Somebody fire…", 'id': 1394327894193807361, 'Usr_loc': None, 'hashtags': []}
{'text': 'RT @bigbbyspree: Y’all laugh at Soulja Boy but he deadass was the first rapper to do mad shit', 'id': 1394327894206341126, 'Usr_loc': 'Chicago, IL', 'hashtags': []}
{'text': 'RT @Marialamet_16: @MSuppasit @BamBam1A We love these types of interviews! Short but cute,n even very funny,we understood u perfectly bc it…', 'id': 1394327894357254144, 'Usr_loc': 'บางนา, กรุงเทพมหานคร', 'hashtags': []}
{'text': 'RT @jeremiah_judah_: Sisters enduring in this truth keeping the commandments of the most high y’all are appreciated and play an important r…', 'id': 1394327894298697728, 'Usr_loc': 'New Yerushalyim', 'hashtags': []}
{'text': 'RT @fkaLuna_: We were all really out here trying to explain to folks that people throw in rocks at armed military in self defense were not…', 'id': 1394327894269255686, 'Usr_loc': 'Ashburn, VA', 'hashtags': []}
{'text': 'Thandanggyi, Kayin: Anti-Regime Protest by youths from Thandanggyi on May17. To end this unjust Dictatorship and to… https://t.co/lKi8mbAH19', 'id': 1394327894105608194, 'Usr_loc': 'Singapore', 'hashtags': []}
{'text': 'RT @HallieOnMSNBC: Of all the trans people that have been murdered here in Puerto Rico over the last year and a half, not one of them has r…', 'id': 1394327894420332554, 'Usr_loc': 'She/her', 'hashtags': []}
{'text': 'RT @iamAuthorMaya: @Manekagandhibjp  \n One man in neighbourhood fed stray dogs on innocent kittens. All we need is justice to be done to th…', 'id': 1394327894525054976, 'Usr_loc': 'Bhubaneshwar, India', 'hashtags': []}
{'text': 'RT @MyaTheeGoddess: Boyyy y’all don’t know bout these right here! https://t.co/VdgIydmSTt', 'id': 1394327894491492360, 'Usr_loc': 'Phoenix, AZ', 'hashtags': []}
{'text': "RT @cheonsa_ragu: Carats saying their broke af but watch this pre order gets sold out tomorrow in minute,, y'all ain't fooling me this time loudly_crying_face ", 'id': 1394327897008078850, 'Usr_loc': 'San Jose, Mimaropa', 'hashtags': []}
{'text': 'We love and appreciate yall red_heart ️', 'id': 1394327896970436611, 'Usr_loc': 'Baltimore, MD', 'hashtags': []}
{'text': 'please keep on streaming. we all want nct dream to go home grasping trophies right?', 'id': 1394327897045798915, 'Usr_loc': '५ 生きているパラドックスです\njaemsung brainr𖦹t !?\n ⿻  ‘02  ♯ rcbyf !!\n\nHot sauce 깊이 dip that eh\n날 따라 넌 twist that eh\nHot sauce 타오를 때 ooh\n입맛대로 골라 ma dish', 'hashtags': []}
{'text': '@AIPAC @JoeBiden @USUN @StateDept We miss the Trump administration. No one was daring to mess with Israel when the… https://t.co/p5ArpThEmm', 'id': 1394327896983064576, 'Usr_loc': None, 'hashtags': []}
{'text': 'Yep.... I’m taking all bets  face_with_tears_of_joy  https://t.co/cuKahzK8lD', 'id': 1394327896626372609, 'Usr_loc': 'Oakland', 'hashtags': []}
{'text': "RT @AbuIvankaTrump: MOUZLIMS, AS YOUR COMMANDER NOT IN CHIEF, I NEED YOUR HELP\n\nLET'S ALL REPORT @IDF FOR TERRORISM, HATE SPEECH, AND ITS P…", 'id': 1394327897096081409, 'Usr_loc': 'Sungai Buloh, Selangor', 'hashtags': []}
{'text': 'RT @SoSeaEmerald: When former OLEO Dir. Deborah Jacobs “started releasing information publicly — the reports [into Tommy Le’s and Mi’Chance…', 'id': 1394327897104556038, 'Usr_loc': 'Seattle, WA', 'hashtags': []}
{'text': 'RT @dorisolaitan_: A relationship where y\'all "fix it" together with respectable communication&gt;&gt;&gt;', 'id': 1394327897104650245, 'Usr_loc': 'Orlando, FL', 'hashtags': []}
{'text': 'RT @sukumaranlens: @MeghUpdates @LaliGanguli @jdhankhar1 \nGuys --send every video clip and details of all violences to Governor ----give th…', 'id': 1394327897087741957, 'Usr_loc': None, 'hashtags': []}
{'text': 'RT @AppleAtiny: People with 6.000 followers and following like 200, they have 100 interactions each tweet and they all come out on tl cryin…', 'id': 1394327896974532618, 'Usr_loc': 'caratland', 'hashtags': []}
{'text': '@DebDirtylooks @PerneythePoet My god all that for marijuana which white people are becoming millionaires off of????… https://t.co/WKrG4dZTzb', 'id': 1394327896471261186, 'Usr_loc': None, 'hashtags': []}
{'text': 'thinking about when i got my hair done &amp; didnt like it and @SydneeBruce texted all of our friends individually and… https://t.co/0GOV3GUwmg', 'id': 1394327897133879299, 'Usr_loc': None, 'hashtags': []}
{'text': 'DKAKDJS IT’S ALL FUN AND GAMES UNTIL YOU REALIZE THAT EMBER- BUT AS A HUMAN- WOULD BE CLOSE TO 7 FEET TALL\n\nTheir 5… https://t.co/heocoLzvFS', 'id': 1394327897272377346, 'Usr_loc': 'They/them ', 'hashtags': []}
{'text': '@Electricfish7 @widepussycat did you see that famous argonian? he can wield two swords as if it does not affect him at all.', 'id': 1394327897134010369, 'Usr_loc': None, 'hashtags': []}
{'text': 'RT @MikeAnd7272: @l_stone Give it a rest Doug, Ontario Public Health has much different numbers. \nWe all know what you’re long term plan is…', 'id': 1394327897276563464, 'Usr_loc': 'Ottawa/Toronto', 'hashtags': []}
{'text': 'RT @PoojaMe00746459: SOS @ChennaiCares @104_GoTN @ranjim - Can we do something for her, please? Would really appreciate all the help!', 'id': 1394327897251352577, 'Usr_loc': None, 'hashtags': []}
{'text': '@iAryeh You do realize that most of the workers at Kroger and it’s other chains are all union employees?  That is a… https://t.co/odW6xI47Qj', 'id': 1394327897226334212, 'Usr_loc': 'Hamilton, OH', 'hashtags': []}
{'text': "RT @FiloMULTI:  sparkles SHAWOLs  sparkles \n\n pushpin I'll be sharing ALL the STREAMING links for the\nSHINee WORLD J Presents ~ Bistro de SHINee ~ (05.23)\n\n pushpin ALL THE…", 'id': 1394327897393926146, 'Usr_loc': None, 'hashtags': []}
{'text': "RT @owlybeats: So here's the full tracklist for 'Nocturnal'\nOut next Friday on all platforms, and you can get it a week early on @slimzosre…", 'id': 1394327897381421056, 'Usr_loc': 'England, United Kingdom', 'hashtags': []}
{'text': 'RT @KashmiriPandit7: Almost all Indians, certainly all who care for the country have resoundingly given a verdict. \n\nNot once, but Twice (…', 'id': 1394327897373122561, 'Usr_loc': 'Global  Indian Citizen ', 'hashtags': []}
{'text': '@atensnut @Daytha123 I have been saying all along that I believe that kids that are forced to get it for school wil… https://t.co/4JIOqzWxr5', 'id': 1394327897301733380, 'Usr_loc': None, 'hashtags': []}
{'text': 'RT @Farah_Gazan: Nonstop heavy airstrikes since yesterday, all around Gaza, on the streets and infrastructure, citizens houses, cars, peopl…', 'id': 1394327897511317505, 'Usr_loc': 'Taekook’s land', 'hashtags': []}
{'text': 'Respecting a pedophile ? Y’all down bad  slightly_frowning_face ', 'id': 1394327897461112837, 'Usr_loc': None, 'hashtags': []}
{'text': 'Dawg idc take all my money loudly_crying_face  loudly_crying_face ', 'id': 1394327897586941955, 'Usr_loc': '?', 'hashtags': []}
{'text': "@chuck_boyer @SCOTUSblog Just reminding y'all that illegalising it is most likely not the solution.", 'id': 1394327897792557056, 'Usr_loc': 'check pinned tweet ;)) ', 'hashtags': []}
{'text': 'RT @Farda_Alphonso: He got to do me first to show me he’s all business.', 'id': 1394327897754816514, 'Usr_loc': 'Chicago, IL', 'hashtags': []}
{'text': "@HillingdonMayor Thanks for the reply , this is a weekly occurrence. Up until now we didn't know the the culprit wa… https://t.co/ohP5aes7HJ", 'id': 1394327897695993863, 'Usr_loc': None, 'hashtags': []}
{'text': '@dilucetta okay okay im ready in all my 150cm glory come at me ari  person_cartwheeling  person_running \n\nuwu i appreciate love thank u', 'id': 1394327897825976329, 'Usr_loc': None, 'hashtags': []}
{'text': 'RT @reeenns: They didn’t leave their pet fish y’all think they gonna leave their land', 'id': 1394327897792516100, 'Usr_loc': 'في الركن البعيد الهادي', 'hashtags': []}
{'text': 'RT @GautamGambhir: Ppl of Delhi returned concentrators after recovery &amp; now they are being used by hospitals. Hope all patients get better…', 'id': 1394327897905668096, 'Usr_loc': 'Kolhapur, India', 'hashtags': []}
{'text': 'i’m such a crybaby man , i legit keep tearing up watching all the success around me🥺 i’m so proud of all my friends man  loudly_crying_face  red_heart ️', 'id': 1394327897993850883, 'Usr_loc': 'Atlanta, GA', 'hashtags': []}
{'text': 'All this to lose to the sixers', 'id': 1394327897012269056, 'Usr_loc': 'Where Yo Mom Stay ', 'hashtags': []}
{'text': 'RT @FruitilyArt:  sparkles  COMMISSIONS OPEN  sparkles \nHello people. I opened commissions. Paypal (EUR &amp; USD) and Ko-fi (USD) only.\nI’m too sad to make an a…', 'id': 1394327898098737166, 'Usr_loc': 'Commissions: Slots Oct 2021', 'hashtags': []}
{'text': "RT @MichaelRosenYes: First they advocated herd immunity but because we were old it wouldn't matter if we died.Then they advocated lockdown…", 'id': 1394327898094542850, 'Usr_loc': None, 'hashtags': []}
{'text': 'RT @MisterPreda: happy 30th @JoeyGraceffa 🤍 may this next decade around the sun bring you all the happiness, love and continued success in…', 'id': 1394327898140528640, 'Usr_loc': 'Gone with Juice ', 'hashtags': []}
{'text': '@parragb It’s filling the gap that’s all lol', 'id': 1394327898132148224, 'Usr_loc': None, 'hashtags': []}
{'text': 'RT @hrrysarmy: reminder again that https://t.co/cAslINijNe is an amazing website for you to go to in order to support the business owners t…', 'id': 1394327898199232520, 'Usr_loc': "99' | her/she | EN/CN | 2기", 'hashtags': []}
{'text': 'RT @sridharamurthy7: @kaushikcbasu Almost all Bharathiyas certainly all who care for the country, are waiting for 2024 the way Bharathiya o…', 'id': 1394327898241179653, 'Usr_loc': 'up', 'hashtags': []}
{'text': '@lou_tenore I was all over that the Cubs should have been trying to trade Marisnick _before he got hurt_.\n\nSee how… https://t.co/vqfMQldZ2L', 'id': 1394327898136457216, 'Usr_loc': 'In the 815', 'hashtags': []}
{'text': 'RT @leslie_bern: I am once again begging people to understand that professors are not the ones who benefit from exorbitant tuition rates.…', 'id': 1394327898132127749, 'Usr_loc': None, 'hashtags': []}
{'text': 'All American today sneezing_face  woman_dancing  medium_skin_tone   woman_dancing  medium_skin_tone  woman_dancing  medium_skin_tone ', 'id': 1394327898379718664, 'Usr_loc': None, 'hashtags': []}
{'text': 'RT @Shape_Pay: Thanks Everyone for Support!\n\n2nd round all token sold out before phase time end rocket  rocket \n\n3rd/Last Round coming in 48 hours.\n\n#Sha…', 'id': 1394327898358640649, 'Usr_loc': None, 'hashtags': []}
{'text': 'RT @lilyachty: Yall toxic as hell, im scared of y’all', 'id': 1394327898371379208, 'Usr_loc': 'Logan, OH', 'hashtags': []}
{'text': 'RT @EXOBBS50_CHARTS: EXO IS HOME....\n\nWe obtained a deal from @JamesB_65 who will be giving funds in return for 10k likes. \n\nPlease help us…', 'id': 1394327898379726850, 'Usr_loc': 'EXO', 'hashtags': []}
{'text': '@JeffOnTheRight Some people are looking so hard for racism that they will ‘see’ it in places it doesn’t exist in or… https://t.co/DhjImsPz4w', 'id': 1394327898354454531, 'Usr_loc': None, 'hashtags': []}
{'text': 'Would anyone like to ask me any questions for my YouTube video?\nAnything about life smiling_face_with_open_mouth_&_closed_eyes 🤍\nI’ve missed u all!', 'id': 1394327898522275843, 'Usr_loc': 'Insta:lxubear', 'hashtags': []}
{'text': 'Gardeners reaction says it all.', 'id': 1394327898442584065, 'Usr_loc': 'North West, England', 'hashtags': []}
{'text': '@WifeMother36 All over your body!', 'id': 1394327898425810956, 'Usr_loc': None, 'hashtags': []}
{'text': "@ShotsFPS A war? That's tough but marvel for the long haul, it's what they do. But a single all out battle? Anime every time.", 'id': 1394327898509676546, 'Usr_loc': 'Amissville, Va', 'hashtags': []}
{'text': 'RT @Morgane__arts: All my recents A5 paintings https://t.co/ANpc3a9r34', 'id': 1394327901202493448, 'Usr_loc': None, 'hashtags': []}
{'text': "can sam please do a tiny desk concert for the second album I've been binge-watching them all day", 'id': 1394327901298962439, 'Usr_loc': 'leeds | 21       she/her', 'hashtags': []}
{'text': 'RT @mama_c2: While we are all focused on Matt Gaetz today, it’s a good time for Biden to step up expanding the Supreme Court.  We now see B…', 'id': 1394327901282111489, 'Usr_loc': 'Illinois, USA', 'hashtags': []}
{'text': 'RT @kokorashell: literally no one at all: \n\nme: do you still like me or', 'id': 1394327901261242368, 'Usr_loc': None, 'hashtags': []}
{'text': 'Whether it be in a groupchat or dms it doesnt matter what the place is nor the time its just so hard to talk with a… https://t.co/knrGp1gBq8', 'id': 1394327901240168450, 'Usr_loc': '14 ', 'hashtags': []}
{'text': 'RT @swati_gs: You can disagree with the Dasna priest for putting up a sign prohibiting a community from entering his temple premises. But t…', 'id': 1394327901382713347, 'Usr_loc': None, 'hashtags': []}
{'text': 'RT @stfuvienbbn: literally all the time https://t.co/CpeenZ6bkz', 'id': 1394327901219082243, 'Usr_loc': 'mystic falls | beacon high', 'hashtags': []}
{'text': 'RT @ayyeshaha: ig every woman knows it’s not all men. but we never know WHICH men. so we stay wary of ALL men. it’s not complex physics', 'id': 1394327901407879168, 'Usr_loc': None, 'hashtags': []}
{'text': 'RT @venadavenu: National Institute for Trashing India - Aayog... \nunveiling disastrous projects, ideas since 2015. https://t.co/AQB3pDYev3', 'id': 1394327901307240448, 'Usr_loc': 'Bengaluru, India', 'hashtags': []}
{'text': 'That’s wild if lamelo get Roy he missed hella games', 'id': 1394327901340852226, 'Usr_loc': 'Yo Grandma House ', 'hashtags': []}
{'text': 'RT @Elis5bang: Remember when Taeyang did this Vogue photoshoot and he included all staffs who helped him to make White Night album as a way…', 'id': 1394327901303033857, 'Usr_loc': None, 'hashtags': []}
{'text': 'RT @byunbaeksluv: EXO-LS WE’RE ONLY 11k SALES AWAY FROM BEATING EXO’S ALL TIME RECORD FOR HIGHEST PREORDERS IN A WEEK (119k in ktown) WE HA…', 'id': 1394327901542223872, 'Usr_loc': 'she/her', 'hashtags': []}
{'text': '@GabieCake home of sex you all', 'id': 1394327901454180353, 'Usr_loc': None, 'hashtags': []}
{'text': "@calvinrobinson All things pass... he'll even get bored with himself at some point.", 'id': 1394327901554855943, 'Usr_loc': None, 'hashtags': []}
{'text': "RT @thisdayinkpop: 5 years ago today Monsta X released their third EP, 'The Clan Pt. 1 Lost', as well as the music video for the title sing…", 'id': 1394327901621809152, 'Usr_loc': 'Sofia † 180913 | 수고했어요. 💙 고생했', 'hashtags': []}
{'text': 'Baekhyun name is in the top again  smiling_face_with_heart-eyes  smiling_face_with_heart-eyes  fire ', 'id': 1394327901529587713, 'Usr_loc': ' NEVER LAND 🎵', 'hashtags': []}
{'text': 'RT @CaucasianJames: y’all mind if i have a good week', 'id': 1394327901764558850, 'Usr_loc': None, 'hashtags': []}
{'text': "RT @adoreseokhan: not even a single carat has a right to come over svt's concepts. svt has a wide range of music genres and concepts, can't…", 'id': 1394327901688926214, 'Usr_loc': '— wonwoozidolly', 'hashtags': []}
{'text': 'RT @SeviriaCosplay: Do your worst y’all, let’s unlock this shizzzzzzz  eyes  RT the original post  face_blowing_a_kiss ', 'id': 1394327901764530181, 'Usr_loc': None, 'hashtags': []}
{'text': 'was i the only person that knew how to play this game', 'id': 1394327901693218816, 'Usr_loc': 'ig:bdgrlwl', 'hashtags': []}
{'text': "RT @DoughyDevious: At a buffet crime scene, it's important to thoroughly examine (&amp; taste) all the food.\nShiro can sniff out any dangerous…", 'id': 1394327901693267970, 'Usr_loc': 'right in the bowels of hell', 'hashtags': []}
{'text': "@HornSpouting @bellboy905 @ChuckGrassley @realDonaldTrump Yes. It was. Biden's administration should have been able… https://t.co/Q7jSllR8h0", 'id': 1394327901731004417, 'Usr_loc': None, 'hashtags': []}
{'text': '@baytIahem @nocrimeivy Buddy she’s absolutely right, no matter how hard I love my religion, the community itself ha… https://t.co/oCGSSrnad2', 'id': 1394327901714141186, 'Usr_loc': 'Lille, France', 'hashtags': []}
{'text': 'RT @Thom_astro: Spring has not taken over all of the northern hemisphere – three examples in Asia where snow can still be found.  snowflake  #Mission…', 'id': 1394327901915451392, 'Usr_loc': 'Marseille', 'hashtags': []}
{'text': "RT @luvyou3kbts: Indian armys you all better get ready to stream 5 times more this cb to save our spot #1 on Spotify, bc we'll be competing…", 'id': 1394327901869207552, 'Usr_loc': None, 'hashtags': []}
{'text': 'RT @bigbbyspree: Y’all laugh at Soulja Boy but he deadass was the first rapper to do mad shit', 'id': 1394327901886164994, 'Usr_loc': 'New York, NY', 'hashtags': []}
{'text': 'what happened?', 'id': 1394327901894479873, 'Usr_loc': None, 'hashtags': []}
{'text': "RT @EXOPublicity: ( thread ) FANBASES DEALS THAT ARE ABOUT TO END Due to time limit bur didn't reach the goal of likes. So we need all EXOL…", 'id': 1394327901911216129, 'Usr_loc': "that's okay - D.O. (LIVE)", 'hashtags': []}
{'text': "RT @frijoliz: Biden voters insist that people who voted for him didn't expect him to be perfect all around only that he would be ok in some…", 'id': 1394327901898612743, 'Usr_loc': 'Tewa Land / she her ella ', 'hashtags': []}
{'text': 'Base repair continues on Old Babine Lake Road. Watch for traffic control. Please obey all signs and direction of th… https://t.co/fwo6BO3m2C', 'id': 1394327901412134913, 'Usr_loc': 'Kamloops, BC', 'hashtags': []}
{'text': 'RT @michaelwhite: The Brexit bargain sale continues: markets cheap, sterling low, investor confidence weak, so all a good time for predator…', 'id': 1394327902120992769, 'Usr_loc': 'England', 'hashtags': []}
{'text': 'RT @TXTOFFlCIAL: our biggest chance to give them wins on music shows is during the first week, the competition is definitely tough but ther…', 'id': 1394327902179631110, 'Usr_loc': 'TS • TXT • BTS', 'hashtags': []}
{'text': 'RT @_dnxw: i used to be the “chaser” in all of my friendships &amp; relationships.. literally begging for reciprocation and to be treated corre…', 'id': 1394327902087487490, 'Usr_loc': 'Nakuru', 'hashtags': []}
{'text': '@RT_com She is accused in terrorist activities and she is a criminal and other quality all knows', 'id': 1394327902167003138, 'Usr_loc': 'Hyderabad, India', 'hashtags': []}
{'text': 'I’m making a song with all heavy drops...... who am I???  face_with_tears_of_joy ', 'id': 1394327902297100290, 'Usr_loc': 'Denver, CO', 'hashtags': []}
{'text': 'RT @PrincJan_:  sparkles Good afternoon y’all sparkles  white_small_square ️ black_small_square ️ white_small_square ️ https://t.co/J5ZmHfW60c', 'id': 1394327902234234882, 'Usr_loc': '🐼', 'hashtags': []}
{'text': '@marlenvargas lol I might just go all the way and forget the last season existed', 'id': 1394327902280314882, 'Usr_loc': 'los angeles ↪️dorchester,617', 'hashtags': []}
{'text': 'I have no friends I’m bored all day long until Xavion wakes up', 'id': 1394327902334951425, 'Usr_loc': None, 'hashtags': []}
{'text': 'My GenX heart is ready to burst  red_heart ️', 'id': 1394327902217461763, 'Usr_loc': None, 'hashtags': []}
{'text': 'RT @firstladyship: 1. Peter Obi\n2. Kingsley Moghalu\n3. Akinwumi Adesina\n\nThey said all we do is attack Tinubu without providing alternative…', 'id': 1394327902271918088, 'Usr_loc': 'Nigeria', 'hashtags': []}
{'text': 'RT @_AsiwajuLerry: I’m tired of getting tasked as if I scam people for a living. You went to buy something, they’ll task you. Bikeman will…', 'id': 1394327902293053443, 'Usr_loc': 'Rocinante', 'hashtags': []}
{'text': 'RT @AnishNation: On International Day Against Homophobia, Transphobia and Biphobia, we can all stand to learn more about gender and sexuali…', 'id': 1394327902280290318, 'Usr_loc': 'Oneida 41, Ontario', 'hashtags': []}
{'text': '@grantthethief oh I INSIST, because if we all have some more Kiku in our hearts the world will be a better place', 'id': 1394327902263685120, 'Usr_loc': 'Official Sasaki Hand Holder', 'hashtags': []}
{'text': 'RT @mikepompeo: The CCP and some liberals in Congress like @BernieSanders, @AOC &amp; @IlhanMN are siding with Hamas terrorists and against Ame…', 'id': 1394327902330757123, 'Usr_loc': 'New York, NY', 'hashtags': []}
{'text': '@NikeAdeyemi https://t.co/eUyGd2MCJv @NikeAdeyemi please help us', 'id': 1394327902242607104, 'Usr_loc': None, 'hashtags': []}
{'text': 'As all the problems of Brexit become clearer it would be pointless to say "We told you so" but.......\nWE TOLD YOU SO!', 'id': 1394327902381035520, 'Usr_loc': 'Basingstoke, UK', 'hashtags': []}
{'text': '@undervery not at all!!! u look like cute smol bean  two_hearts  two_hearts ', 'id': 1394327905375752197, 'Usr_loc': 'she/her', 'hashtags': []}
{'text': '@Tolerated13 @NYGovCuomo @CDCgov This is what this was all about. He wanted to be the one who lifts it and not the CDC.', 'id': 1394327902435557376, 'Usr_loc': None, 'hashtags': []}
{'text': 'I got 6.5. All the training holding my breath around perfumed people, the Lush store and laundry fumes has helped.… https://t.co/Npu5QCHbmp', 'id': 1394327905279299584, 'Usr_loc': 'Guelph, Ontario', 'hashtags': []}
{'text': "RT @KinelRyan: I know it's tough for people with mental disabilities to understand humor, but you could have at least looked at my Twitter…", 'id': 1394327905388408833, 'Usr_loc': None, 'hashtags': []}
{'text': '@pindhfloyd @nahoosat In Pk, The dranks unite us all  bottle_with_popping_cork ', 'id': 1394327905459740677, 'Usr_loc': 'Karachi, Pakistan', 'hashtags': []}
{'text': 'RT @beadeddreams421: 15% off my etsy all day sparkles  \nNo code needed 🥰 https://t.co/R71WaHrTs2', 'id': 1394327905463902208, 'Usr_loc': 'Here, There, Everywhere', 'hashtags': []}
{'text': '@notthatkristen I picture the ex player  resumes. High school equivalency. Special skill: nickname generation (er t… https://t.co/tGzloBQTL7', 'id': 1394327905438625798, 'Usr_loc': None, 'hashtags': []}
{'text': '“Come all without, come all within, You’ll not seen nothing like the mighty Quinn.” - Bob Dylan  red_heart ️ i’m so grateful… https://t.co/KXHqHGo87j', 'id': 1394327904956260354, 'Usr_loc': None, 'hashtags': []}
{'text': 'RT @lncels: What y’all know bout luxury https://t.co/QEBiijtJSh', 'id': 1394327905606406157, 'Usr_loc': None, 'hashtags': []}
{'text': 'RT @Hanaeleh: @EkbMary @Marylaw55555 @Freedom4Horses @nytimes @EVANESCENTMRS @skydogsanctuary @MustangRehab @Blueequus775 @CyntWhite We wro…', 'id': 1394327905669419024, 'Usr_loc': 'Wild horse land', 'hashtags': []}
{'text': "RT @TradesTrey: I'm lookin' at you shitadel, and so is Mark Cuban https://t.co/LaOMVaIEwI", 'id': 1394327905510043657, 'Usr_loc': None, 'hashtags': []}
{'text': ' snowflake : … The linework’s all warped here. It bothers me.\n artist_palette : It’s like that for the same reason!\n snowflake : Huh. I didn’t really… https://t.co/KhInOkILyS', 'id': 1394327905526853642, 'Usr_loc': None, 'hashtags': []}
{'text': 'RT @misanthropicc92: Someone once said Twitter is the sociology seminar where no one has done the reading but everyone is speaking. I think…', 'id': 1394327905723813895, 'Usr_loc': None, 'hashtags': []}
{'text': "@BrianRupp16 @MacFarlaneNews @joncoopertweets The same thing all criminals don't get: why the law applies to them.", 'id': 1394327905740656651, 'Usr_loc': None, 'hashtags': []}
{'text': "RT @hjhopeworld: ateez, eden-ary, bbtrippin, stylists, make up artists... all those people under kq roof are working so hard to show ateez'…", 'id': 1394327905761742856, 'Usr_loc': 'Munich, Germany', 'hashtags': []}
{'text': '@lankynation License plate all in the camera he finna get charged  loudly_crying_face ', 'id': 1394327905619136513, 'Usr_loc': 'Broward, FL', 'hashtags': []}
{'text': '@Tactical_review I\'ll just keep this simple..\n\nWho wants to argue and correct a "Dystopian" leftist-ass that can\'t… https://t.co/71gSKu0kba', 'id': 1394327905757392898, 'Usr_loc': None, 'hashtags': []}
{'text': 'RT @lastnightsnora: I’m the friend you can cancel on, it’s definitely ok I won’t be mad at all', 'id': 1394327905891663874, 'Usr_loc': '999', 'hashtags': []}
{'text': "RT @exo_statistics: 'DON'T FIGHT THE FEELING (Expansion Ver.)' debuts at #1 on Ktown4u Daily Chart (5/17/21) with 20,105 copies sold!  fire \n\n—…", 'id': 1394327905790988291, 'Usr_loc': 'exoplanet', 'hashtags': []}
{'text': 'Courageous', 'id': 1394327905740726272, 'Usr_loc': 'Budapest', 'hashtags': []}
{'text': 'Y’all ugly &amp; musty', 'id': 1394327906000809987, 'Usr_loc': '7️⃣1️⃣3️⃣, TX', 'hashtags': []}
{'text': 'RT @ImSaravananJ: @GopalSri @SadhguruJV @ptrmadurai Even when PTR was in opposition, he did not mention anything against the bad maintenanc…', 'id': 1394327905895784454, 'Usr_loc': 'New Delhi, India', 'hashtags': []}
{'text': 'The Palestinians are only stupid people I know of who attack another country then squawk &amp; cry when that country ki… https://t.co/1KqCZp2yQM', 'id': 1394327905925222403, 'Usr_loc': 'U.S.A.', 'hashtags': []}
{'text': 'RT @JIN_4707: ok everyone, the “click to donate” (at https://t.co/uWJYNW2qMg) thing is not helpful at all. palestinians have actually been…', 'id': 1394327906042658818, 'Usr_loc': 'blm | she/they | (l)gbt | 16', 'hashtags': []}
{'text': 'RT @btsvotingorg: 7 days left to vote BTS for Top Social Artist. \n\n✓ Cast 10x votes on all your accounts daily.\n✓ Always check your voting…', 'id': 1394327906109722625, 'Usr_loc': None, 'hashtags': []}
{'text': '@Mike_Haracz A Italian Beef with no Peppers or juice at all', 'id': 1394327906076266504, 'Usr_loc': None, 'hashtags': []}
{'text': "RT @AnneWheaton: Feels like it should go without saying but I'll say it anyway: If you're taking video of yourself arguing with a business…", 'id': 1394327906181025793, 'Usr_loc': 'Los Angeles', 'hashtags': []}
{'text': 'RT @khanna248: Our @NarendraModi will continue to absorb all the hate directed towards him but he will not say what he should have said to…', 'id': 1394327906189381637, 'Usr_loc': 'Bangalore', 'hashtags': []}
{'text': 'Congratulations @Diya_tweetz for 2100 followers, will only say this, you deserve all of this n so much more, keep s… https://t.co/rLMJPCkrky', 'id': 1394327906122272769, 'Usr_loc': 'Hindustan', 'hashtags': []}
{'text': 'RT @KarlThyer: **GIVEAWAY**\n\nTo enter for a chance to have your face/family member in the space next to Salah as a personalised print.\n\nAll…', 'id': 1394327906181124099, 'Usr_loc': 'SE, London, UK', 'hashtags': []}
{'text': '@molineuxmusings We need strengthening all down the spine of the team.', 'id': 1394327906181132288, 'Usr_loc': None, 'hashtags': []}
{'text': "RT @lulbabylina559: being all about 1 person isn't hard, y'all just hoes.", 'id': 1394327906252247040, 'Usr_loc': 'California, USA', 'hashtags': []}
{'text': 'Also, in hard times, I’d probably want to depend on someone.\nEven if it was a bother to them. After all, if I don’t… https://t.co/WCVteYJlRq', 'id': 1394327906269241352, 'Usr_loc': 'current quote count: 276', 'hashtags': []}
{'text': 'Exactly what I said to my husband! Don’t get distracted by the UFO narrative on MSM. They’re Trying to change the n… https://t.co/9ZJF6bnAxg', 'id': 1394327905833033731, 'Usr_loc': None, 'hashtags': []}
{'text': "RT @exo_statistics: 'DON'T FIGHT THE FEELING (Expansion Ver.)' debuts at #1 on Ktown4u Daily Chart (5/17/21) with 20,105 copies sold!  fire \n\n—…", 'id': 1394327906332119045, 'Usr_loc': None, 'hashtags': []}
{'text': "@BaWubba \nSeriously. Misinformation and character assassination isn't an argument.\nIt's already telling that this i… https://t.co/XJa7awSPM9", 'id': 1394327906525106176, 'Usr_loc': 'Qatar', 'hashtags': []}
{'text': 'RT @snshoresback: RATIO/PAYOLA GC \nRETWEET to join\n- No Richard Ramirez or Nicki Minaj hate/slander\n- 6 Plugs a day\n- Kicking inactives dai…', 'id': 1394327906701103104, 'Usr_loc': 'yuh', 'hashtags': []}
{'text': 'Thomas Sankara might be my favorite revolutionary. Like if I could pick one person to sit down and chat about philo… https://t.co/WAbS8MZLrU', 'id': 1394327906743201799, 'Usr_loc': 'Village Hidden in the Clouds', 'hashtags': []}
{'text': "RT @FfurryStud: A new JFF superfan is enjoying my 345 videos, 427 posts, 153 photos, and 3755 likes. Here's a sneak peek. See ALL my conten…", 'id': 1394327906818609155, 'Usr_loc': 'Green Cove Springs, FL', 'hashtags': []}
{'text': 'Sometimes lies will try to tear us apart, Hardships will try to deceive us but just focus on me then. In the darkne… https://t.co/TfVEWQbwZd', 'id': 1394327905937723401, 'Usr_loc': None, 'hashtags': []}
{'text': 'RT @lastnightsnora: I’m the friend you can cancel on, it’s definitely ok I won’t be mad at all', 'id': 1394327906818605056, 'Usr_loc': 'New York, NY', 'hashtags': []}
{'text': '@Ada_Nsukka_ @MP52658792 @GovWike South-South is an indirect way of British and Nigerian government taking all oil… https://t.co/kojKTqhAvp', 'id': 1394327906713804804, 'Usr_loc': 'Abia State ', 'hashtags': []}
{'text': "RT @anadoluagency: Turkish president, Pope Francis discuss Israeli attacks on Palestinians \n\nIsrael's attacks are not only against Palestin…", 'id': 1394327906931777541, 'Usr_loc': 'Brisbane, Queensland', 'hashtags': []}
{'text': 'RT @sandorokis: SAN 🪐:\n\n"right now my thighs are"\n"about to explode"\n"gosh, today"\n"i rode a bike for 24km"\n"but that\'s not the end"\n"choi…', 'id': 1394327906894110720, 'Usr_loc': 'Santiago, Chile', 'hashtags': []}
{'text': 'RT @misanthropicc92: Someone once said Twitter is the sociology seminar where no one has done the reading but everyone is speaking. I think…', 'id': 1394327906982187012, 'Usr_loc': 'Texas', 'hashtags': []}
{'text': 'RT @BesuraTaansane: Lets not miss woods for the trees\n\nTheres no problem with a minister offering prompt help to anyone(w/o even being tagg…', 'id': 1394327907024084995, 'Usr_loc': 'Bengaluru, India', 'hashtags': []}
{'text': 'all seventeen,txt,enhypen, and taemin stuff today  smiling_face_with_sunglasses  cat_face_with_wry_smile  see-no-evil_monkey ', 'id': 1394327907082948612, 'Usr_loc': 'btsvt ', 'hashtags': []}
{'text': 'RT @thedgtalempress: they like married men because they’ve been vetted already in their minds. they’re lazy and don’t want to go put in the…', 'id': 1394327906936098818, 'Usr_loc': 'Dallas, TX', 'hashtags': []}
{'text': 'RT @Chenfordsss: imma putta reminder out here at let y’all know that these two dorks have feelings for each other And Ik they feel that spa…', 'id': 1394327909586833413, 'Usr_loc': None, 'hashtags': []}
{'text': 'In Meiktila, Yangon terrorists abducted two civilians and inspected all the by passing vehicles.… https://t.co/qcYnjPMYBi', 'id': 1394327909444161537, 'Usr_loc': 'Los Angeles, CA', 'hashtags': []}
{'text': '@hamshankilton @mstewart_23 Is that instead of not turning up at all?  face_with_tears_of_joy  face_with_tears_of_joy  face_with_tears_of_joy ', 'id': 1394327909683417088, 'Usr_loc': None, 'hashtags': []}
{'text': 'RT @nawal66: We were not “touched” we were deeply and profoundly offended. \nYour weak and superficial apology is an act even graver than yo…', 'id': 1394327909578547205, 'Usr_loc': 'The Capital, Kuwait', 'hashtags': []}
{'text': "RT @GoddessZelinaRP: It's been awhile and we all know you love being my little bitch. Now, kneel before me and tell me what my name is, my…", 'id': 1394327909536571393, 'Usr_loc': None, 'hashtags': []}
{'text': 'RT @EricEstepp17: NASCAR Fan Council survey gonna be like\n\n blue_circle  Do you prefer moving the door number?\n\nOR\n\n red_circle  Do you prefer all the race teams…', 'id': 1394327909817479173, 'Usr_loc': 'Unity', 'hashtags': []}
{'text': '@RonLebow @Donna37779188 All for a "Tourist Group" too....\n\nGQP LIES', 'id': 1394327909662330881, 'Usr_loc': 'Tampa Bay FL', 'hashtags': []}
{'text': 'RT @asianbenchtwt: THIS IS A LINKTREE THAT HAS ALL THE INFO OF WHATS HAPPENING IN PALESTINE. \nREAD &amp; RT\nhttps://t.co/gyom661WAY', 'id': 1394327909834399744, 'Usr_loc': 'star/stars..∞ crrd byf ‹3', 'hashtags': []}
{'text': "RT @HereticHousewif: @POTUS We're trying to figure out what to do. Husband's employer's plan (7k family deductible, 80/20 coinsurance, co-p…", 'id': 1394327909846945792, 'Usr_loc': None, 'hashtags': []}
{'text': 'RT @Brick_Outhouse: I wish y\'all were exposed to couples that actually love one another so you can stop talking this "what do you bring to…', 'id': 1394327909838491648, 'Usr_loc': 'where ever my dreams take me', 'hashtags': []}
{'text': '@thankscinco5 @SquaredCe @byKateSmith Obviously - but equating a fetus to a fully sentient human (to the extent tha… https://t.co/Mvb3tJ4MGz', 'id': 1394327909725245441, 'Usr_loc': None, 'hashtags': []}
{'text': 'This will almost certainly be headline news tonight.  Great news.', 'id': 1394327909859479555, 'Usr_loc': 'UK', 'hashtags': []}
{'text': 'RT @dreamiesverse: i hope you all realize that if we don’t keep streaming, we’re not gonna get all 7 wins for 7dream', 'id': 1394327909918150663, 'Usr_loc': '💙 7DREAMONLY', 'hashtags': []}
{'text': 'RT @Louis_Allday: All these hand-wringing comments do is perpetuate the fallacy that US policy under Biden was ever going to be an iota dif…', 'id': 1394327909817585668, 'Usr_loc': 'New York', 'hashtags': []}
{'text': '@EmeraldRobinson If only she could go mute now we would all be happy.', 'id': 1394327910014767106, 'Usr_loc': None, 'hashtags': []}
{'text': 'RT @Eat_THA_maN: When I tell y’all I’m crying https://t.co/XN59rxlRoA', 'id': 1394327910014672909, 'Usr_loc': 'Rich$ociety', 'hashtags': []}
{'text': 'RT @___inCANdescent: Bottomless mimosas &gt;&gt;&gt; hearing that gays and wh0res are going to h3ll', 'id': 1394327909989486594, 'Usr_loc': '704.', 'hashtags': []}
{'text': 'So I’ve just deleted all my saves and mods, downloaded reshade and a preset. Now downloading MM cc and plan to comp… https://t.co/iHt2rENHJo', 'id': 1394327910077632513, 'Usr_loc': None, 'hashtags': []}
{'text': 'Just Listed in Parma!  house_with_garden  \nClick below for INSTANT ACCESS to all photos, details and more!  man \u200d woman \u200d girl \u200d boy  \nWelcome to this l… https://t.co/o0Y6QLM4d8', 'id': 1394327909893091328, 'Usr_loc': 'Parma Ohio', 'hashtags': []}
{'text': 'Never felt more Sunday league than yesterday, @GageTaylor14 having to hold up the goal for the whole first half so… https://t.co/HQeqlKy7Qq', 'id': 1394327909213646852, 'Usr_loc': 'South West, England', 'hashtags': []}
{'text': 'In Taunggyi, Shan State, junta thugs inspect all the bypassing vehicles in front of Hnin Lwin Lwin Photography shop… https://t.co/BnisqJWkYc', 'id': 1394327909955870728, 'Usr_loc': None, 'hashtags': []}
{'text': '@CNBCnow Oh boy! More mindless pablum for the masses, and even less artistic control! What a wonderful world we liv… https://t.co/kxugxxG174', 'id': 1394327910027251715, 'Usr_loc': None, 'hashtags': []}
{'text': 'RT @atzkesh: atiny, have you heard what Eden said yet?? please make more whosfan accounts as many as you can!! and please stream. they all…', 'id': 1394327910287298566, 'Usr_loc': None, 'hashtags': []}
{'text': "@iWantMyMomDead the whole point of adding u is for u to talk  loudly_crying_face  loudly_crying_face  loudly_crying_face  babe all my irls r extroverts you'd get overwhelmed", 'id': 1394327910291476482, 'Usr_loc': 'fer/geck/kitty 6TEEN ENBY', 'hashtags': []}
{'text': 'RT @KYC_co:  collision BECOME A VIP CUSTOMER  collision \n\nARE YOU INTERESTED IN BUYING HERBALIFE PRODUCTS ON DISCOUNT??!\n\nRegister as A VIP CUSTOMER &amp; start pu…', 'id': 1394327910241079299, 'Usr_loc': 'Mumbai', 'hashtags': []}
{'text': 'RT @EoinHiggins_: You see all of the kids around me, they’re just kids.  \n\nWhy would you just send a missile to them?\n\n— a 10-year-old girl…', 'id': 1394327910169948161, 'Usr_loc': 'madriz', 'hashtags': []}
{'text': "RT @da13thsun: TMH's ELOHYIM is Real!\nFacts 101\n\nELOHYIM had me CHIN CHECKING MYSELF about DISAGREEABLE DISAPPOINTING Cuzos.\n\nI don't have…", 'id': 1394327910354407426, 'Usr_loc': 'Muu/Florida, USA', 'hashtags': []}
{'text': 'RT @WorldwideCarats: FRIDAY IS THE START OF TRACKING WEEK FOR BILLBOARD CHARTS. \n\nLET US GIVE OUR ALL SUPPORT FOR THEIR 8TH MINI ALBUM\n\nLET…', 'id': 1394327910354350085, 'Usr_loc': 'she/her', 'hashtags': []}
{'text': 'RT @JackPosobiec: BREAKING: Book written by US Space Force whistleblower on Marxism in the military becomes #1 book on all of Amazon \nhttps…', 'id': 1394327910392098819, 'Usr_loc': 'California, USA', 'hashtags': []}
{'text': "RT @exo_statistics: 'DON'T FIGHT THE FEELING' has now surpassed 105 THOUSAND (105,000) pre-orders on Ktown4u alone!\n\nPB 1 - 43,181\nPB 2 - 3…", 'id': 1394327910564065287, 'Usr_loc': None, 'hashtags': []}
{'text': '@nathaliejacoby1 @JlipsLips Thank you for all you do to help us connect with other like-minded people! I know it’s… https://t.co/K7nTCGtu6G', 'id': 1394327910417375233, 'Usr_loc': 'Roanoke, VA', 'hashtags': []}
{'text': "It's all about platform engagement on the latest Bleav in Sports Law with @JeremyMEvansESQ  mobile_phone  money_bag  Join him on the lates… https://t.co/JSg0vrYs1E", 'id': 1394327908961902600, 'Usr_loc': 'Los Angeles, CA', 'hashtags': []}
{'text': 'RT @LawrenceTechES: Look LTU, we moved up to number 11, let’s keep climbing! We are so thankful for the support that you all have given us.…', 'id': 1394327910572609539, 'Usr_loc': None, 'hashtags': []}
{'text': 'RT @KVCWesterlo: Berke leaves KVC Westerlo and returns to Fenerbahçe. He has a wonderful goodbye message for our supporters.  yellow_heart  blue_heart \n\nThank you…', 'id': 1394327910601871364, 'Usr_loc': None, 'hashtags': []}
{'text': '@Only1_variaa Srsly dislike that y’all manly bitch', 'id': 1394327910551625731, 'Usr_loc': 'Florida, USA', 'hashtags': []}
{'text': "RT @ShannonFreshour: Are you effing kidding me @Google?\n\nSeriously did y'all of all people think you'd be able to hide? https://t.co/mUfKu1…", 'id': 1394327910572457984, 'Usr_loc': None, 'hashtags': []}
{'text': 'dumb bitch', 'id': 1394327910610317312, 'Usr_loc': 'she/her, bisexual 🇲🇽', 'hashtags': []}
{'text': '@successfuljay30 @AbsoluteChelsea Exactly all possesion ball till we are down by a goal then they realize that they… https://t.co/M5wYXrQ5jk', 'id': 1394327910580883456, 'Usr_loc': None, 'hashtags': []}
{'text': 'RT @Brian_Riedl: Medicare-For-All would cost approx $3.2 trillion/yr, while defense currently spends $733 billion. \n\nWhich is why neither R…', 'id': 1394327910652256265, 'Usr_loc': 'Indiana, USA', 'hashtags': []}
{'text': 'prayers for the industrial family🤍y’all have gone through a lot this week and i hope you all find strength. and pra… https://t.co/COzGzhVpmg', 'id': 1394327910706786306, 'Usr_loc': None, 'hashtags': []}
{'text': 'RT @OECTAProv: Today is the International Day Against Homophobia, Biphobia, &amp; Transphobia. Today reminds that the work of standing against…', 'id': 1394327910857707524, 'Usr_loc': 'Settler Algonquin Unceded Terr', 'hashtags': []}
{'text': 'RT @JustitiaMatrona: @clairecmc How can we help educate them, Claire? Maybe it\'s time to take a lesson from the Epoch Times and send some "…', 'id': 1394327910861914116, 'Usr_loc': 'Living Blue in Red State ', 'hashtags': []}
{'text': 'RT @coffeespoonie: This includes my service dog. Don’t touch my service dog.', 'id': 1394327910832611330, 'Usr_loc': 'the South', 'hashtags': []}
{'text': 'RT @loveforcsan: instead of sticking your nose in other fandoms business, atinys y’all need to be focusing on whosfan and making more accou…', 'id': 1394327910928904193, 'Usr_loc': 'India', 'hashtags': []}
{'text': "@TygerBrahe A deal is better than constant conflict. Both sides need to compromise but the Palestinians don't want… https://t.co/XukZXzDLdE", 'id': 1394327910849384453, 'Usr_loc': 'London, Ontario, Canada', 'hashtags': []}
{'text': 'RT @reeenns: They didn’t leave their pet fish y’all think they gonna leave their land', 'id': 1394327910949953539, 'Usr_loc': 'Melaka Tengah, Melaka', 'hashtags': []}
{'text': "RT @falastineee48: don't you ever forget that palestinians have been screaming all of this for 73 years and the world chose to wait until n…", 'id': 1394327911029690373, 'Usr_loc': 'Treaty 1 ', 'hashtags': []}
{'text': 'RT @OutdoorPlayCA: *Calling all Outdoor Play Advocates*\nThrough an in-depth process @OutdoorPlayCA identified the major priorities and acti…', 'id': 1394327911100911618, 'Usr_loc': None, 'hashtags': []}
{'text': 'RT @OlakunleHughes_: You can now win cool monthly giveaways prices on MelBet. All you have to do is download the app. Register with my prom…', 'id': 1394327913852506112, 'Usr_loc': 'Nigeria', 'hashtags': []}
{'text': 'RT @adriianboy1: Happy end ! 🥴\nClick here to see all videos backhand_index_pointing_down \nhttps://t.co/RXzhjQH6ai \n\nhttps://t.co/RXzhjQH6ai https://t.co/hlZCPSvJnj', 'id': 1394327913928044546, 'Usr_loc': 'Florida, USA', 'hashtags': []}
{'text': 'RT @atirasss: Y’all bellies does just be...flat? Just so?', 'id': 1394327913852547073, 'Usr_loc': 'Cuba', 'hashtags': []}
{'text': 'RT @tomgara: Extraordinary photo from Gaza on the front page of The Guardian today - six year old Suzy Eshkuntana pulled alive from the rub…', 'id': 1394327913906982913, 'Usr_loc': 'Milwaukee, WI', 'hashtags': []}
{'text': " musical_note \nTill the one day while their uni was insolvent\nSome bankers thought it'd help the fiscal crunch\nIf they threw \nou… https://t.co/96PzxIsVT6", 'id': 1394327913219166208, 'Usr_loc': 'Sudbury, Ontario', 'hashtags': []}
{'text': '@lthomas2689 @DavidPepper @FrankLaRose Actually some of the policy changes (like not allowing voters to request a b… https://t.co/wqAtRppFtY', 'id': 1394327913852461056, 'Usr_loc': 'United States', 'hashtags': []}
{'text': 'When are we going to learn that all that the American government does is lie???? They literally just lie over and o… https://t.co/wH1NxfsnL2', 'id': 1394327913714098176, 'Usr_loc': None, 'hashtags': []}
{'text': "@ghostofxmikey AND Y'ALL LOOK SO GOOD PLS", 'id': 1394327914083229700, 'Usr_loc': 'she/her ○ artist', 'hashtags': []}
{'text': 'Yes it out more effort into the situation of fucking w/ them! Like omm.. ion get it face_with_tears_of_joy ', 'id': 1394327914032865280, 'Usr_loc': 'Charleston, SC', 'hashtags': []}
{'text': 'In Taunggyi, Shan State, junta thugs inspect all the bypassing vehicles in front of Hnin Lwin Lwin Photography shop… https://t.co/ZxNY5zTsFy', 'id': 1394327913957367816, 'Usr_loc': None, 'hashtags': []}
{'text': '@EyeGritty @bosskingman @FeistyPK2 Didn’t we all!', 'id': 1394327914250866692, 'Usr_loc': 'Planet Earth', 'hashtags': []}
{'text': 'RT @m00nlithalo: People with Albinism are not white-passing omg', 'id': 1394327914116702208, 'Usr_loc': None, 'hashtags': []}
{'text': '@patrick_scar @Nengwe_Macheza @usopen @RafaelNadal @DjokerNole @InteBNLdItalia @atptour Are you all crazy.  Did you… https://t.co/oSPMGOwuU4', 'id': 1394327914183811075, 'Usr_loc': '#TrueNorth', 'hashtags': []}
{'text': 'RT @Nandini41982051: SSR Heartbeat Of SSRians\nYou will always be in my soul\nI will love you till the end of time\nAll because\nMy heart beats…', 'id': 1394327914267611145, 'Usr_loc': 'India', 'hashtags': []}
{'text': 'RT @JusticeTierney: do y’all even know what white passing means????', 'id': 1394327914305359878, 'Usr_loc': '\nL dot A dot Californ-I-A hot', 'hashtags': []}
{'text': 'RT @NonFatMead: That Invisible Hand sure became fucking visible for employees all of a sudden...', 'id': 1394327914317946891, 'Usr_loc': None, 'hashtags': []}
{'text': 'RT @NunyaB127: @RachelSanditon I’ve been thinking that too. He was always team Sidlotte. Told us to keep fighting for them. I’m sure he had…', 'id': 1394327914313748489, 'Usr_loc': 'Montana, USA', 'hashtags': []}
{'text': 'RT @DrAmjadsaqib1: Mr Shaukat Tarin, Minister Finance, said, "Tricke down approach is not enough to reduce poverty. We need to support micr…', 'id': 1394327914456522758, 'Usr_loc': 'San Jose, CA', 'hashtags': []}
{'text': 'RT @lastnightsnora: I’m the friend you can cancel on, it’s definitely ok I won’t be mad at all', 'id': 1394327914364248067, 'Usr_loc': 'Ba sing se', 'hashtags': []}
{'text': "RT @JohnOberg: Fish spend all day, every day, trying to escape these hellish, disease-ridden fish farms, only to remain trapped until they'…", 'id': 1394327914326409221, 'Usr_loc': None, 'hashtags': []}
{'text': 'RT @brianpmangan: @Dianne4NYC We say all the time that "lived experience" matters. Dianne was the victim of extortion in this case... a liv…', 'id': 1394327914494275587, 'Usr_loc': 'Brooklyn', 'hashtags': []}
{'text': "Beautiful trend showing up my feed. Know that y'all cute I'm just shy to physically tap the  red_heart ️", 'id': 1394327914511011844, 'Usr_loc': None, 'hashtags': []}
{'text': '@matensii @kitschlet Yeah if xue yang had an ounce of chill and hadn’t immediately shouted all of xxc’s worse fears… https://t.co/3DOVM2Mfol', 'id': 1394327914368405504, 'Usr_loc': None, 'hashtags': []}
{'text': "RT @MacFarlaneNews: NEW:  Hearing set for tomorrow for US Capitol riot defendant Landon Copeland, who's accused of assaulting police &amp; scre…", 'id': 1394327914607427589, 'Usr_loc': 'Florida, USA', 'hashtags': []}
{'text': 'Max belongs in the pit. Scared for whoever they face.', 'id': 1394327914448138245, 'Usr_loc': 'Brooklyn, NY', 'hashtags': []}
{'text': "RT @nyaahong: Seventeen: Are you ready to ‘love’ together with us?\n\n–We already fell for y'all the moment we entered the fandom and slipped…", 'id': 1394327914569633794, 'Usr_loc': 'lagi nyaman di akun ini', 'hashtags': []}
{'text': "RT @kurap1ks: i wish someone would ride for me the way frubatwt rides for tohru y'all are insane", 'id': 1394327914720546816, 'Usr_loc': None, 'hashtags': []}
{'text': 'RT @hallamohieddeen: Morning all, just a reminder that our Gaza offices were bombed and destroyed 2 days ago. Israel has yet to provide any…', 'id': 1394327914699796480, 'Usr_loc': None, 'hashtags': []}
{'text': '// nah not at all', 'id': 1394327914452226049, 'Usr_loc': 'He/They/Xe/It/Star/Bun', 'hashtags': []}
{'text': 'RT @PeterStefanovi2: This is how Government Ministers should be held to account! Excellent from @adilray on @GMB today. If only all news sh…', 'id': 1394327914611712003, 'Usr_loc': None, 'hashtags': []}
{'text': 'RT @abdool_moh: Anytime I see rape issues, I always imagine how heartless one can be to have the courage of forcing himself on a woman most…', 'id': 1394327914733256712, 'Usr_loc': 'Zamfara, Nigeria', 'hashtags': []}
{'text': '@JackArnett11 @DeanKinne All this while paying $1,100 per week to many "unemployed" when that group get ready there… https://t.co/n5m2nXS6Ue', 'id': 1394327914733182987, 'Usr_loc': 'Las Vegas, NV', 'hashtags': []}
{'text': '1. We are rooted in a moral analysis based on our deepest religious and constitutional values that demand justice f… https://t.co/qLR8kLC3jJ', 'id': 1394327914938871813, 'Usr_loc': 'Michigan, USA', 'hashtags': []}
{'text': 'RT @CleveWatkiss: ...And here it is. All of this  black_heart  raising_hands  dark_skin_tone  clapping_hands  dark_skin_tone  folded_hands  dark_skin_tone  https://t.co/cyYuF1mkXm', 'id': 1394327914955649032, 'Usr_loc': 'Annares', 'hashtags': []}
{'text': 'RT @HeatherLeehG: Where are the CT "Climate Initiative" folks now? Apparently not all environmental issues are created equal. https://t.co/…', 'id': 1394327915014262784, 'Usr_loc': 'USA', 'hashtags': []}
{'text': 'RT @_BelleDiaJione_: I’m just so ready to live my best life. Travel, meet new people, date, adventure, learn new hobbies. All of it. By any…', 'id': 1394327915177861120, 'Usr_loc': '¯\\_(ツ)_/¯', 'hashtags': []}
{'text': 'RT @evglowz:  front-facing_baby_chick  speech_balloon \n“Fodingies🥺🥺🥺🥺🥺🥺 Why are you all making me feel emotional TTTTTT two_hearts  two_hearts  two_hearts  two_hearts  two_hearts Thank you all so much TTTTT red_heart ️ red_heart ️ red_heart ️ According to how hap…', 'id': 1394327915203112965, 'Usr_loc': 'evercity    he/him', 'hashtags': []}
{'text': 'RT @taylordvasek: just want to show off my new whoop band that’s all  watch ️ https://t.co/17mldDCfOs', 'id': 1394327915270115339, 'Usr_loc': 'Dallas, TX', 'hashtags': []}
{'text': 'RT @seelieshaw: and im wondering how anybody could stay “neutral” in times when the oppressors can’t even let the dead rest in peace. how D…', 'id': 1394327915123380225, 'Usr_loc': None, 'hashtags': []}
{'text': 'My friends don’t know this, but I wrote their numbers all across the country in the bathroom stalls I pooped in.', 'id': 1394327915328950276, 'Usr_loc': 'Burnettsville, IN', 'hashtags': []}
{'text': 'Watching @AlJENews\ninterview with families seeking shelter in schools, 1 grandmother lost her daughter son-in-law a… https://t.co/qaZQTgIeyW', 'id': 1394327915186241543, 'Usr_loc': 'WIMBLEDON', 'hashtags': []}
{'text': 'Nobody cares that she’s successful. It’s the fact you said she was more successful then Michael which isn’t true in… https://t.co/AgyklTrgo2', 'id': 1394327915056312321, 'Usr_loc': '15 (minor)|| hispanic || ', 'hashtags': []}
{'text': 'RT @SaraCarterDC: This new “wokism’ in the military is a perfect matching for communism. In fact, over the past several years it has plague…', 'id': 1394327915396014082, 'Usr_loc': 'Pennsylvania, USA', 'hashtags': []}
{'text': '@TomLevenson @TVHilton @KendraWrites Pleasant Hill High Graduate 1974. East Bay schools were pretty damn good back… https://t.co/0cEPyV8CLN', 'id': 1394327915303628808, 'Usr_loc': 'Waldo', 'hashtags': []}
{'text': "@KpopAvengers Resonance sounds very strange. SM mixed songs that don't match at all. NCT 2020 could have had anothe… https://t.co/6mk4AKhk5X", 'id': 1394327915307929603, 'Usr_loc': 'Brasil', 'hashtags': []}
{'text': '@WaddKate @M_atty1 @Frcola1 @tomhgill @HumzaYousaf Dream on , won the most seats without overall majority , the fig… https://t.co/2TahLqSOQX', 'id': 1394327917958676485, 'Usr_loc': 'Milton Kenes ', 'hashtags': []}
{'text': 'I’m thinking of doing a little mecation &amp; traveling somewhere solo... have any of y’all ever done this? Need some tips  weary_face ', 'id': 1394327915395944448, 'Usr_loc': 'New York, NY', 'hashtags': []}
{'text': 'All this pain, all the suffering, all the times ive climbed the mountain of health just to get YEETED to the bottom… https://t.co/K8iRlf85Xu', 'id': 1394327917635653633, 'Usr_loc': 'Las Vegas, NV', 'hashtags': []}
{'text': "Trying to scoop up some funds for my name change ^^ so I'm selling this man. Only worn a few times \n\nComes with:\n-F… https://t.co/F4fMjf2qnn", 'id': 1394327917375590403, 'Usr_loc': None, 'hashtags': []}
{'text': '@JTBommarito @SDCAttractions All the big rides\nEat all the food\nYou don’t pet the sharks. You ride them down Mystic… https://t.co/FBH335RHMc', 'id': 1394327918076043265, 'Usr_loc': 'Shawnee, KS', 'hashtags': []}
{'text': 'Lou Barletta stopped at a New Castle dirt quarry during his 2018 U.S. Senate run. It rained and cost me upwards of… https://t.co/LVwZZiz6VH', 'id': 1394327918021578754, 'Usr_loc': 'New Castle, PA', 'hashtags': []}
{'text': 'RT @iamKierraD: So the numbers weren’t there for decoration??? https://t.co/3YqKTbBd39', 'id': 1394327918302666771, 'Usr_loc': '🧩NC', 'hashtags': []}
{'text': 'RT @onikasmajestyyy: when we get this on streaming services it’s over for y’all faves  relieved_face  \nhttps://t.co/S044Ta0yzl', 'id': 1394327918336253955, 'Usr_loc': 'Brooklyn NY', 'hashtags': []}
{'text': 'RT @MahaliaSBM: When folks be saying all they use is “tea tree oil and black soap” i want you to think of this. https://t.co/YP0pJ8I59f', 'id': 1394327918520713225, 'Usr_loc': None, 'hashtags': []}
{'text': 'RT @QuiteTheFreak: WATCH ALL MY CONTENT USE THE LINK BELOW https://t.co/IBWzyOa1yN', 'id': 1394327918478770177, 'Usr_loc': None, 'hashtags': []}
{'text': 'RT @TheAnuragTyagi: 1million target complete of tweets Still trending thanks to all who help us, This is student power flexed_biceps  #modiji_cancel12thb…', 'id': 1394327918482886657, 'Usr_loc': None, 'hashtags': []}
{'text': 'RT @ShooterMcGavin_: All I see is Gilmore not hustling back on defense and cherry picking.', 'id': 1394327918382403585, 'Usr_loc': 'Houlton, Me', 'hashtags': []}
{'text': 'RT @CMO_Odisha: Addressing an all-party meet, CM @Naveen_Odisha said that Odisha’s healthcare system has responded well without getting ove…', 'id': 1394327918558466048, 'Usr_loc': None, 'hashtags': []}
{'text': 'He will be back soon', 'id': 1394327918483017740, 'Usr_loc': 'Parler @MadViking', 'hashtags': []}
{'text': "#1- I've been sjw since I was a kid in bama and watched the awful prejudices against others.\n\n#2- How am I shoving… https://t.co/ZtdgSngnUM", 'id': 1394327918407389185, 'Usr_loc': 'San Diego', 'hashtags': []}
{'text': '@MuroCrypto How can you filter messages from more than 400 people that you follow? I am in trouble with less than 1… https://t.co/Sn6od3hpcA', 'id': 1394327918562746373, 'Usr_loc': 'Italia', 'hashtags': []}
{'text': "RT @AmirNatan2: @jupitersalien1 @amnesty That's it...this is the real life. I understand it's ard to accept after all the years you got lie…", 'id': 1394327918617276425, 'Usr_loc': 'Israel', 'hashtags': []}
{'text': 'RT @tomgara: Extraordinary photo from Gaza on the front page of The Guardian today - six year old Suzy Eshkuntana pulled alive from the rub…', 'id': 1394327918659002368, 'Usr_loc': '日本 東京', 'hashtags': []}
{'text': 'RT @Bang_Garr: $200 || 9200 PHP || 2,7 juta rupiah\n|| one winner || Garangan 12 ||\n\nRT, like, follow me and @omniestategroup\u2069\n\nGo to https:…', 'id': 1394327919023906818, 'Usr_loc': 'underpass', 'hashtags': []}
{'text': '@thedailybeast Can we work on this love story?  backhand_index_pointing_left  loudly_crying_face  loudly_crying_face  loudly_crying_face  “Palestinian journalists"  face_savouring_delicious_food  baby_bottle  https://t.co/kEWDXUne2N Click Click for more love', 'id': 1394327918839480327, 'Usr_loc': None, 'hashtags': []}
{'text': 'But I must confess\nI did it all for myself\nI gathered you here\nto hide from some vast unnameable fear\nBut the lonel… https://t.co/1iM6wFFAVU', 'id': 1394327918977994758, 'Usr_loc': 'feel free to ask for sources!', 'hashtags': []}
{'text': "RT @nctyarchive: [210517] CHENLE \n\ntry finding me ㅋㅋㅋㅋㅋㅋㅋ i'm happyyyy. Being in the same frame as your idol is this feeling~ i stayed up a…", 'id': 1394327919019892739, 'Usr_loc': '21+', 'hashtags': []}
{'text': 'RT @ScottZILWarrior: I will send one random person $750 in 72hrs all you have to do is RT and be following myself &amp; @flurmoon \n\n$250 if joi…', 'id': 1394327919078608900, 'Usr_loc': None, 'hashtags': []}
{'text': 'RT @_abby_y: Will I ever find true love?', 'id': 1394327918885625857, 'Usr_loc': 'Lagos, Nigeria', 'hashtags': []}
{'text': "RT @Melody_2d1n: They are protecting him as much as ilhoon is protecting them. Let's not question their brotherhood, i know it's tough for…", 'id': 1394327918969450496, 'Usr_loc': None, 'hashtags': []}
{'text': 'I am at a loss to understand why people whom I considered level headed spread this lie and make themselves part of… https://t.co/2mRwUhUxT3', 'id': 1394327919015735299, 'Usr_loc': None, 'hashtags': []}
{'text': 'RT @boluxxxx: There was not a problem when Northern Governors met and issued a communique.\nSouthern Governor’s meet and do same in this our…', 'id': 1394327919124680710, 'Usr_loc': 'Port Harcourt.', 'hashtags': []}
{'text': 'RT @your_arshath: We sent a message to  the Palestinian people: In your struggle for freedom, you will never be alone. Humanity people all…', 'id': 1394327919124647939, 'Usr_loc': 'Chandigarh, India', 'hashtags': []}
{'text': 'breathing all up in that ear with that hot ass breath', 'id': 1394327919124746243, 'Usr_loc': 'white', 'hashtags': []}
{'text': 'RT @NanyaBissness: @LegendaryCaps All that I feel is pain. https://t.co/JYA5KXVBPs', 'id': 1394327919212875787, 'Usr_loc': 'snowdin town', 'hashtags': []}
{'text': 'RT @TeslaTruckClub: I honestly don’t know how anyone looking to buy a new $35k+ car/cuv can look at all of the options and not choose a Tes…', 'id': 1394327919078649867, 'Usr_loc': 'Columbia, South Carolina', 'hashtags': []}
{'text': "RT @pledis_17: [17'S] We sat down for another whimderful conversation with @wmag for the Music Issue upside-down_face \nRead all about it here!\nhttps://t.co/…", 'id': 1394327919296618499, 'Usr_loc': None, 'hashtags': []}
{'text': 'i love idea of toshinori being like a tired elder gay that all of the queer UA kids come to for advice even though… https://t.co/YFY2aUvhRw', 'id': 1394327919225360384, 'Usr_loc': None, 'hashtags': []}
{'text': 'RT @ThickPapiDickk: my beard and shirt be all wet when I’m eating some good ass  peach  tongue  sweat_droplets  https://t.co/pfVz9P5oAw', 'id': 1394327919267389442, 'Usr_loc': 'Indianapolis, IN', 'hashtags': []}
{'text': 'RT @IHSAA1: Thank you to high school officials for being role models and following virus protocols all year long! Without your service and…', 'id': 1394327919439265796, 'Usr_loc': None, 'hashtags': []}
{'text': 'RT @rahulroushan: Ummah above all.', 'id': 1394327919342747648, 'Usr_loc': None, 'hashtags': []}
{'text': '@GaryBarlow I wanna see in your eyes, I wanna hold you in my arms, I wanna hug you tight, I wanna keep you safe fro… https://t.co/lnOCGiLpF6', 'id': 1394327919405805572, 'Usr_loc': 'Turin, Italy ', 'hashtags': []}
{'text': 'RT @HallieOnMSNBC: Of all the trans people that have been murdered here in Puerto Rico over the last year and a half, not one of them has r…', 'id': 1394327919724539904, 'Usr_loc': 'Puerto Rico', 'hashtags': []}
{'text': 'RT @misanthropicc92: Someone once said Twitter is the sociology seminar where no one has done the reading but everyone is speaking. I think…', 'id': 1394327919636406281, 'Usr_loc': 'New York', 'hashtags': []}
{'text': 'RT @jonasabadilla: Better suggestion: Don’t call at all unless you messaged the person beforehand to ask permission for a call', 'id': 1394327919669899268, 'Usr_loc': 'Malacca', 'hashtags': []}
{'text': 'RT @k8em0: “saying basic income is socialism is as absurd as saying money is socialism. It’s money. It’s all it is. What do people do with…', 'id': 1394327919489691655, 'Usr_loc': 'east coast usa', 'hashtags': []}
{'text': 'All we need is weed', 'id': 1394327919728775170, 'Usr_loc': 'Uruguay', 'hashtags': []}
{'text': 'no lives matter\n\nall brains splatter', 'id': 1394327919951073281, 'Usr_loc': 'satan’s bedroom', 'hashtags': []}
{'text': 'a puppy', 'id': 1394327919854489604, 'Usr_loc': None, 'hashtags': []}
{'text': 'It’s all mental, choose peace  victory_hand  medium-light_skin_tone ', 'id': 1394327919896502274, 'Usr_loc': 'home working on psych degree📚', 'hashtags': []}
{'text': '@corpse_darkweb @IDF I am not a right person to say anything,i have a suggetion to you,u should ask to yourself,eit… https://t.co/sf892mSjP3', 'id': 1394327922152861696, 'Usr_loc': 'Noida, India', 'hashtags': []}
{'text': "RT @jamesmb: 2. Means of living (cash, traveller's cheques, valid international credit card) along with an insurance certificate  covering…", 'id': 1394327922467561478, 'Usr_loc': 'Germany 🇩🇪 ', 'hashtags': []}
{'text': '@swapfolio_app All of that $CC @CryptoCartCC  dip.', 'id': 1394327922425663492, 'Usr_loc': None, 'hashtags': []}
{'text': 'show mad whack now lol', 'id': 1394327922585083908, 'Usr_loc': '150 Dream Team 🌟& 999 🖤', 'hashtags': []}
{'text': 'They took turns with my man putting it in my butt, every time it a new guy put it in, it felt like I was starting a… https://t.co/KvU8Cr7NTN', 'id': 1394327922660552704, 'Usr_loc': None, 'hashtags': []}
{'text': 'RT @thehankhan: The attacks on Palestinian Christians are very silenced even in the West because their existence proves that Isr**l is not…', 'id': 1394327922639572998, 'Usr_loc': None, 'hashtags': []}
{'text': 'RT @ourbadmuses:  speaking_head  speaking_head  speaking_head your friend in an abusive relationship isn\'t "stupid" for staying, they\'re having a trauma + abandonment response to th…', 'id': 1394327922736091138, 'Usr_loc': 'Between realities ', 'hashtags': []}
{'text': "RT @andrewperezdc: Naturally, this is one of the hospital chains that funds the Partnership for America's Health Care Future, the health ca…", 'id': 1394327922580807684, 'Usr_loc': 'Michigan, USA', 'hashtags': []}
{'text': '@WWE @natalieevamarie The best women’s wrestler of all time in my opinion!', 'id': 1394327922819969025, 'Usr_loc': None, 'hashtags': []}
{'text': 'RT @cryptopolica:  loudspeaker  A total of $1,945 worth of giveaways in this compilation! Feel free to click, browse and join them all 🤍\n\nhttps://t.co/…', 'id': 1394327922907914241, 'Usr_loc': None, 'hashtags': []}
{'text': 'RT @tomgara: Extraordinary photo from Gaza on the front page of The Guardian today - six year old Suzy Eshkuntana pulled alive from the rub…', 'id': 1394327922924720130, 'Usr_loc': None, 'hashtags': []}
{'text': 'RT @satoverma: He was doing all this while workers on ground were committed to the idea of Hindu nationalism mostly. Yet, Vajpayee was crav…', 'id': 1394327923088261121, 'Usr_loc': None, 'hashtags': []}
{'text': 'RT @ceraldi_carleen: Good morning my lovelies two_hearts \nI need a baby dragon. \nIf I had a baby dragon, that little sucker would ride around all day…', 'id': 1394327923071492098, 'Usr_loc': 'Alberta', 'hashtags': []}
{'text': "RT @NickyNesh_: It's all about the angles with @KiaSouthAfrica Rio  red_heart ️🇿🇦. This car has been my longest test car and I can say I know it as i…", 'id': 1394327922958381061, 'Usr_loc': 'Johannesburg, South Africa', 'hashtags': []}
{'text': 'RT @JIN_4707: ok everyone, the “click to donate” (at https://t.co/uWJYNW2qMg) thing is not helpful at all. palestinians have actually been…', 'id': 1394327922861875200, 'Usr_loc': 'she/her | 16', 'hashtags': []}
{'text': 'Ummm 90%??? I know that there is weird animosity between SOME Sakura and  Hinata fans but I’m gonna need y’all to s… https://t.co/fl3pdy8O6h', 'id': 1394327922916282374, 'Usr_loc': None, 'hashtags': []}
{'text': 'RT @morehub2: Is brunch time Accra City for all your iPhones &amp; Apple related products don’t get duped call @morehub2 on 0541815593 and let’…', 'id': 1394327923088297985, 'Usr_loc': 'Tema, Ghana', 'hashtags': []}
{'text': 'RT @skeinnydipping: @PedroYokes @Grilledmelt @katmoo14 If you’re vaccinated and immunocompromised there aren’t sufficient data to say that…', 'id': 1394327923126059010, 'Usr_loc': 'Ohio, USA', 'hashtags': []}
{'text': 'RT @shiginope: dont stop talking about palestine until it’s free. until all of us outside of palestine get the right to return.', 'id': 1394327923050618881, 'Usr_loc': 'anything but they/them', 'hashtags': []}
{'text': 'story and wanted to share it with others. A character named Bevin Kacon showed up in his story and we all decided t… https://t.co/3LnSqy6cyJ', 'id': 1394327922492674055, 'Usr_loc': 'Somewhere in Tamriel', 'hashtags': []}
{'text': '@mike_daws Most underrated guitarist of all time.', 'id': 1394327923226710017, 'Usr_loc': None, 'hashtags': []}
{'text': 'RT @rap_mca: This past week has been very tough for my home, Gaza City. I just want the world to know about the situation in Palestine. \n\nM…', 'id': 1394327923285495808, 'Usr_loc': None, 'hashtags': []}
{'text': '@drvconway @jpquinn78 @mickmuldoon @UCC @UCCAlumDevel Yiz are all barred for lowering the tone. No sneaking back up the stairs!', 'id': 1394327923281301517, 'Usr_loc': None, 'hashtags': []}
{'text': "RT @pujaawasthi: This is Shahjahanpur's 'Cylinder Bitiya' who's been transporting &amp; refilling O2 cylinders 4 free. Arshi Ansari saw how dif…", 'id': 1394327923188912131, 'Usr_loc': 'Mumbai', 'hashtags': []}
{'text': 'RT @reedgalen: All due respect, there are plenty of us out here every day who stand up for democracy, the rule of law and the American way…', 'id': 1394327923344171018, 'Usr_loc': None, 'hashtags': []}
{'text': '@dcmohali @GirishDayalan - sir we have started free pick up and drop services to all senior citizens. My grandmothe… https://t.co/lcdEhmVrHn', 'id': 1394327923432181760, 'Usr_loc': 'Mumbai/Chandigarh', 'hashtags': []}
{'text': "the thing is, all of these practices have to be embedded in institutions. lawmakers don't have the time or care to… https://t.co/mVvMs9akoW", 'id': 1394327923461697541, 'Usr_loc': 'winooski vt', 'hashtags': []}
{'text': 'RT @Forbes: Tax day is here. Plus, all the latest in personal finance: https://t.co/ObZTE32lOC https://t.co/lYgswgqJw4', 'id': 1394327923511943174, 'Usr_loc': 'London, England.', 'hashtags': []}
{'text': 'This is specifically daileees cause these been my Day 1s lol', 'id': 1394327923713265666, 'Usr_loc': 'Fiery depth of apocalypse', 'hashtags': []}
{'text': 'RT @MNageswarRaoIPS: This is massive. Ms dress up as Hs to falsely blame Hs for terrorism.\n\nBollywood is biggest teacher for criminals/terr…', 'id': 1394327923759325185, 'Usr_loc': None, 'hashtags': []}
{'text': 'RT @KIWIBYUL: to everyone who has assignments due or exams around the time of mamamoo’s comeback i wish you all the best and let’s use the…', 'id': 1394327923826388992, 'Usr_loc': None, 'hashtags': []}
{'text': 'RT @BillyHeym: “And when the day of Pentecost was fully come, they were all with one accord in one place.\nAnd suddenly there came a sound f…', 'id': 1394327923889295360, 'Usr_loc': 'Silsbee,Texas', 'hashtags': []}
{'text': 'RT @BrEhsan2: Do not be fooled by those jewish rabbis/people who claim to support Palestine! They are all the same. The only difference for…', 'id': 1394327923881021440, 'Usr_loc': 'ok', 'hashtags': []}
{'text': 'RT @magicshopbooks: Happy birthday (KST) to Love Yourself: Tear!  purple_heart \n\nBTS’s 1st million seller KOMCA certified album 🇰🇷\nBTS’s 1st Billboard 2…', 'id': 1394327923910348802, 'Usr_loc': None, 'hashtags': []}
{'text': 'RT @PVasanthibai: @MrsGandhi Mam,Priti, These R all thir duty thy do. In previous govts, thes activities wer don w/o any publicity, adverti…', 'id': 1394327924141006854, 'Usr_loc': None, 'hashtags': []}
{'text': 'RT @FCSyndicate: I wrote my latest article with the least amount of sleep possible  rolling_on_the_floor_laughing  By all means, please retweet the link, share it and as…', 'id': 1394327924178890758, 'Usr_loc': None, 'hashtags': []}
{'text': '@GregAbbott_TX Correction: The case reports came in and they are zero. I checked all the surrounding states and the… https://t.co/TkGWfA5BDn', 'id': 1394327924032131085, 'Usr_loc': 'Texas', 'hashtags': []}
{'text': 'RT @Farda_Alphonso: He got to do me first to show me he’s all business.', 'id': 1394327924015308802, 'Usr_loc': None, 'hashtags': []}
{'text': 'RT @CottontailVA: Have you ever wanted to cuddle me all night long? face_blowing_a_kiss \nNow you can! My BODY PILLOW is ready for purchase~ (sfw or nsfw) \n\n sparkles ht…', 'id': 1394327924275306498, 'Usr_loc': None, 'hashtags': []}
{'text': 'RT @keenan_wav: All this......just to dead https://t.co/dqlC2eppRO', 'id': 1394327924199804940, 'Usr_loc': 'The Bahamas ', 'hashtags': []}
{'text': 'And I put my money in. \nAnd on. \n\nBecause of Kobe Bryant. \nAt Tip Off.  \nThis first NBA Regular Season in this stat… https://t.co/eMKFicAnjl', 'id': 1394327924279545860, 'Usr_loc': 'Los Angeles, CA', 'hashtags': []}
{'text': 'RT @ScottZILWarrior: I will send one random person $350 in 24hrs all you have to do is RT and be following myself &amp; @DerivedFinance\n\nAdditi…', 'id': 1394327924174622721, 'Usr_loc': None, 'hashtags': []}
{'text': 'All indian citizens residing in and out of West Bengal: Termination of Jagdeep Dhankar as Go... https://t.co/sC7T01pRtY via @ChangeOrg_India', 'id': 1394327924036317185, 'Usr_loc': 'Kolkata, India', 'hashtags': []}
{'text': 'RT @Bang_Garr: $200 || 9200 PHP || 2,7 juta rupiah\n|| one winner || Garangan 12 ||\n\nRT, like, follow me and @omniestategroup\u2069\n\nGo to https:…', 'id': 1394327924346523655, 'Usr_loc': None, 'hashtags': []}
{'text': 'RT @KayeSteinsapir: Our beautiful Molly. I found this on her laptop. She is so loved. Thank you all for keeping her spirit vibrant and pres…', 'id': 1394327926364049410, 'Usr_loc': 'Orlando, FL', 'hashtags': []}
{'text': 'NFC East ALL-TEAM\n\nQB: Dak\nRB: Zeke\nWRs : Cooper, McLaurin, Golladay\nTE: Goedert\nLT: Smith\nLG: Martin\nC: Kelce\nRG:… https://t.co/ZN2tYLQXUn', 'id': 1394327926271844355, 'Usr_loc': 'DC', 'hashtags': []}
{'text': 'Thinking about disappearing and going to school in LA or NYC all on my own just to start an entire new life', 'id': 1394327926406057999, 'Usr_loc': 'ChiChi', 'hashtags': []}
{'text': "RT @rbbannerlover: Y'ALL?!?!? https://t.co/cq05jY35pn", 'id': 1394327926364155910, 'Usr_loc': 'Locked in a library ', 'hashtags': []}
{'text': 'RT @MoriartyLab: My god. This page.\n\nIf you know anyone who has lost a loved one to COVID-19 in Canada, or a Canadian lost to COVID-19 abro…', 'id': 1394327926351540229, 'Usr_loc': None, 'hashtags': []}
{'text': 'RT @HeranTigray: 1. On its May 15 report @OCHA_Ethiopia says that only "Seven aid workers have been killed since the start of the conflict…', 'id': 1394327926426935302, 'Usr_loc': None, 'hashtags': []}
{'text': 'Good night all dears 🥰 🥰🥰 https://t.co/eQpffuITzz', 'id': 1394327926196228100, 'Usr_loc': None, 'hashtags': []}
{'text': "Such a fine-looking lamb –\xa0in all the hundreds of lambs around these parts, I've never seen one like this before… https://t.co/4T9lEnDBe2", 'id': 1394327924917080065, 'Usr_loc': 'Scotland', 'hashtags': []}
{'text': 'man but fr this is so cool. he really does it all. fashion designer, singer/songwriter, author, model and so much m… https://t.co/YjTQXSDoj4', 'id': 1394327926297010189, 'Usr_loc': '16 she/her', 'hashtags': []}
{'text': 'RT @ilSharko: Buenas noches to the most Beautiful Patriotos in the world. Remind That beautiful Familia that you love them every single day…', 'id': 1394327926494007298, 'Usr_loc': "God's Country ", 'hashtags': []}
{'text': 'We’ve had a full restock in all sizes of the @saucony Shadow 6000 Navy Silver. Sizes UK 7-11 are available in-store… https://t.co/iSkgeLArEL', 'id': 1394327925130944519, 'Usr_loc': 'Aberdeen & Inverurie', 'hashtags': []}
{'text': 'RT @LunalladeNepron: "I don\'t like sand. It\'s all coarse, and rough, and irritating. And it gets everywhere"\n\nnew dropped boys! and we fina…', 'id': 1394327926523506690, 'Usr_loc': 'Spiderman', 'hashtags': []}
{'text': 'RT @KIWIBYUL: to everyone who has assignments due or exams around the time of mamamoo’s comeback i wish you all the best and let’s use the…', 'id': 1394327926384959503, 'Usr_loc': 'iz*land', 'hashtags': []}
{'text': 'Looking forward to the meeting in Houston this evening', 'id': 1394327926611615747, 'Usr_loc': 'Austin, TX', 'hashtags': []}
{'text': 'RT @atkelli_: y’all lmfaoooooooooooooooo https://t.co/Ssixu2jyPi', 'id': 1394327926586449924, 'Usr_loc': 'France', 'hashtags': []}
{'text': '@soobflix pls all of them are near you :D', 'id': 1394327926624161795, 'Usr_loc': '\U0001f9ad🦔 | she/her ', 'hashtags': []}
{'text': 'All music  musical_notes ', 'id': 1394327926796001285, 'Usr_loc': None, 'hashtags': []}
{'text': '@manjucurry @_kitteninthebox I suddenly remembered when you told me, you can’t just frame me with all this made up drama', 'id': 1394327926716387335, 'Usr_loc': '𝐼𝓃 𝒷𝑒𝒹~', 'hashtags': []}
{'text': '@Telegraph But how will they account for them? (I’m here all week)  clown_face ', 'id': 1394327926687027207, 'Usr_loc': 'London', 'hashtags': []}
{'text': 'RT @hear69sg: I just saw jade rasif’s IG stories. Im horrified. I was under the impression that EVERYONE entering Singapore must go through…', 'id': 1394327926884032512, 'Usr_loc': 'Singapore', 'hashtags': []}
{'text': "lonely? me? not with someone here nagging me all the time, that's for sure.", 'id': 1394327926867365896, 'Usr_loc': 'posts every half hour.', 'hashtags': []}
{'text': "@AskUphold So how does one get a reply from your company? You've tied up my money and do not respond to submissions… https://t.co/oswIoRnstd", 'id': 1394327926699700228, 'Usr_loc': None, 'hashtags': []}
{'text': 'RT @JJTheTubster: SCHEDULE || May 17 - May 23 (EST)\n\nI’m kicking the week off by finishing the RL escape room, all leading to the special w…', 'id': 1394327926942978049, 'Usr_loc': None, 'hashtags': []}
{'text': "RT @itsceleyy: Y'all out here eating Raisin Bran willingly  ??", 'id': 1394327927056224256, 'Usr_loc': None, 'hashtags': []}
{'text': "RT @S66Cams: Mondays can't be all bad when these beauties are live:\n16:00 - 01:00 @LucyGresty \n16:00 - 22:00 @XNatashaChloeX \n17:00 - 00:00…", 'id': 1394327927022571522, 'Usr_loc': None, 'hashtags': []}
{'text': 'RT @lilchinoxl2: HMU when you figure out who you truly are. Y’all will lie to yourselves to believe you’ve gotten everything figured out. S…', 'id': 1394327927039348737, 'Usr_loc': 'Detroit, MI', 'hashtags': []}
{'text': 'RT @Militarydotcom: May is Military Appreciation Month, and all month long we’re celebrating, honoring and thanking the military together w…', 'id': 1394327926611578888, 'Usr_loc': 'Between Beltways', 'hashtags': []}
{'text': 'RT @donkissfics: praying all the stars will align. i feel like she will be okay. better things are coming. i am so excited to see what the…', 'id': 1394327927160852482, 'Usr_loc': None, 'hashtags': []}
{'text': 'RT @OpenYourWallett: Hey y’all, a Black Trans Man really needs funds  for a car. Please circulate this. https://t.co/5UYMiKfLRJ', 'id': 1394327927093858305, 'Usr_loc': 'headspace', 'hashtags': []}
{'text': '@TheAlmightyAK Nah don’t worry. A kid costs way more than $300 a month. You’re not missing anything at all  face_with_tears_of_joy ', 'id': 1394327926980681733, 'Usr_loc': 'Perth Amboy, NJ', 'hashtags': []}
{'text': 'RT @amberkgoodwin: Sorry not sorry in advance for all the law graduation photos y’all are about to get. I’m 41, never been married, have no…', 'id': 1394327927110606851, 'Usr_loc': None, 'hashtags': []}
{'text': '@CryptoFasa $VET $LUNA $SOL $ONE all have potential', 'id': 1394327927165161473, 'Usr_loc': 'Slovenia', 'hashtags': []}
{'text': "RT @chapusopumochi: kingdom final episode will last up to 4 HOURS!!!!!!!  loudly_crying_face  y'all better charge your laptop and phone as soon as possible  rolling_on_the_floor_laughing …", 'id': 1394327927190327298, 'Usr_loc': 'Somewhere in Stayville', 'hashtags': []}
{'text': "We all need to step up to the plate like Peter Stefanovic is doing, we haven't the right to stay silent.", 'id': 1394327927077187587, 'Usr_loc': 'United Kingdom', 'hashtags': []}
{'text': "it's okay if you simply support them by streaming on yt or Spotify!!!", 'id': 1394327927181889538, 'Usr_loc': 'SHE%%HER', 'hashtags': []}
{'text': 'All the way to the outside of my heart. The scattered fragments of flower petals that have flown away. They bury th… https://t.co/xwL1O3ly8m', 'id': 1394327927253311491, 'Usr_loc': 'mod uses vamp/it/sea', 'hashtags': []}
{'text': 'RT @justinamash: In 1948, Israeli forces expelled my father and his family from their home in Ramle. Jews, Christians, Muslims, and Druze h…', 'id': 1394327927320457219, 'Usr_loc': 'Kansas, USA', 'hashtags': []}
{'text': '@mkhulzz we all are.... Lets hope things will get better at Miss World', 'id': 1394327927311978497, 'Usr_loc': 'Jane Furse ,South Africa', 'hashtags': []}
{'text': 'RT @syddxm: drake said " its all fun in games until i wanna play too!"', 'id': 1394327927488229377, 'Usr_loc': None, 'hashtags': []}
{'text': '@James64002261 @tiktokcreators My tiktok also got  banned for reasons unknown to me, after contacting the support w… https://t.co/kicwZlHNR0', 'id': 1394327927312035844, 'Usr_loc': 'Los Angeles, CA', 'hashtags': []}
{'text': 'RT @Farda_Alphonso: He got to do me first to show me he’s all business.', 'id': 1394327927530131460, 'Usr_loc': 'Austin, TX', 'hashtags': []}
{'text': 'RT @jeffreyatucker: People always ask me "but what about India?" This one chart is worth more than all media reports. https://t.co/NxZEKWtA…', 'id': 1394327927584530445, 'Usr_loc': 'HISAR HARYANA INDIA ', 'hashtags': []}
{'text': 'RT @awstar11: I once wore a red shirt in Target and someone asked me for help.  I said, "do you think I work in security or engineering.  I…', 'id': 1394327927509094405, 'Usr_loc': 'Wisconsin', 'hashtags': []}
{'text': 'RT @Blklivesmatter: Black Lives Matter stands in solidarity with Palestinians. We are a movement committed to ending settler colonialism in…', 'id': 1394327927710486534, 'Usr_loc': None, 'hashtags': []}
{'text': '11. We uphold the need to do a season of sustained moral direct action as a way to break through the tweets and shi… https://t.co/y9u1O35j21', 'id': 1394327927601471488, 'Usr_loc': 'Michigan, USA', 'hashtags': []}
{'text': '@baekhyunacee first pic is combined total of all individual covers btw (though indeed he sold the most) https://t.co/Md2nuLM8gs', 'id': 1394327927286734850, 'Usr_loc': 'e e e e e exo-l', 'hashtags': []}
{'text': 'RT @Farda_Alphonso: He got to do me first to show me he’s all business.', 'id': 1394327927626608641, 'Usr_loc': 'Boca Raton, FL', 'hashtags': []}
{'text': "RT @pledis_17: [17'S] We sat down for another whimderful conversation with @wmag for the Music Issue upside-down_face \nRead all about it here!\nhttps://t.co/…", 'id': 1394327930562482181, 'Usr_loc': '🇵🇭', 'hashtags': []}
{'text': "RT @kezia_noble: A few weeks ago the media was obsessed with 'wave' in Brazil. Suddenly, it all stopped. Nobody thought this was a little s…", 'id': 1394327930520625155, 'Usr_loc': 'Yorkshire and The Humber', 'hashtags': []}
{'text': '@vanityve_ Lol! I won’t say all that!  face_with_tears_of_joy  face_with_tears_of_joy  but imma say thank you boo! 🥰 face_with_stuck-out_tongue_&_winking_eye ', 'id': 1394327930529062919, 'Usr_loc': 'Atlanta, GA', 'hashtags': []}
{'text': 'RT @TheRealDrePapi: Some of y’all nowhere near cute enough to talk how you talk about others... but whatever', 'id': 1394327930562650113, 'Usr_loc': 'Duval, FLA to ATL', 'hashtags': []}
{'text': 'RT @dorisolaitan_: A relationship where y\'all "fix it" together with respectable communication&gt;&gt;&gt;', 'id': 1394327930654760963, 'Usr_loc': 'united states', 'hashtags': []}
{'text': 'You gotta be bad, you gotta be bold, you gotta be wiser, you gotta be hard, you gotta be tough, you gotta be strong… https://t.co/DOrjKElQs1', 'id': 1394327929891397636, 'Usr_loc': None, 'hashtags': []}
{'text': 'RT @QuezRene: Sexually transmitted depression', 'id': 1394327930709233665, 'Usr_loc': 'Central valley cali', 'hashtags': []}
{'text': '@BinanceUShelp\n Issue #944267 on Binance US. Submitted all the documents required still trades and withdrawal suspe… https://t.co/cK4kkeEuEg', 'id': 1394327930759639051, 'Usr_loc': None, 'hashtags': []}
{'text': '@jevincherries @StreamersRT1 New channel, going live soon, give us a follow if would be so kind, we support all bac… https://t.co/j0szMivaSs', 'id': 1394327930361294856, 'Usr_loc': 'Scotland', 'hashtags': []}
{'text': 'RT @kirsten93_: Humza Yousaf is an idiot but he is a dangerous one in a position of serious power. Watching all these old tweets resurface…', 'id': 1394327930814312449, 'Usr_loc': None, 'hashtags': []}
{'text': 'RT @TheAdultMoods: mood all summer long https://t.co/QFBLEbNlCP', 'id': 1394327930872999947, 'Usr_loc': 'Providence, RI', 'hashtags': []}
{'text': '@IAmTheActualET I can explain most of this. And the explanations further demonstrate that all this government BS di… https://t.co/hJaGPBLL2n', 'id': 1394327930751397897, 'Usr_loc': 'Boston MA area', 'hashtags': []}
{'text': '@kimmytoteablick All I’m hearing is men are hoes https://t.co/DnWp3dEO58', 'id': 1394327930738728962, 'Usr_loc': 'en tus sueños', 'hashtags': []}
{'text': 'RT @BuddyNoLove: Pussy was probably $15 back then. Y’all raised the price and talk back. Yes. It’s definitely beneath me.', 'id': 1394327930902401024, 'Usr_loc': 'United Kingdom', 'hashtags': []}
{'text': 'RT @ArsenalSouvlaki: Aaron Ramsey is a player we all love and admire, he’s part of the furniture at Arsenal Football Club. Next season is a…', 'id': 1394327931103686656, 'Usr_loc': 'London', 'hashtags': []}
{'text': 'RT @stfuvienbbn: literally all the time https://t.co/CpeenZ6bkz', 'id': 1394327931040657417, 'Usr_loc': None, 'hashtags': []}
{'text': 'RT @reeenns: They didn’t leave their pet fish y’all think they gonna leave their land', 'id': 1394327930910633984, 'Usr_loc': 'Johore, Malaysia', 'hashtags': []}
{'text': "RT @EXOPublicity: ( thread ) FANBASES DEALS THAT ARE ABOUT TO END Due to time limit bur didn't reach the goal of likes. So we need all EXOL…", 'id': 1394327931237724161, 'Usr_loc': 'PHILIPPINES', 'hashtags': []}
{'text': 'All i ask for 🥺', 'id': 1394327931174985735, 'Usr_loc': None, 'hashtags': []}
{'text': 'RT @itserikaguillen: Flirting with your eyes hits different when y’all are both doing it', 'id': 1394327931225313285, 'Usr_loc': 'Miami, FL', 'hashtags': []}
{'text': 'I see an apology, but I fear @ateneodemanilau has placed its reputation on the line. How can you redeem that trust?… https://t.co/yNUduSVmIK', 'id': 1394327931082575878, 'Usr_loc': 'Manila × Singapore', 'hashtags': []}
{'text': 'RT @ScottZILWarrior: I will send one random person $350 in 24hrs all you have to do is RT and be following myself &amp; @MoonRabbitMoney\n\nAddit…', 'id': 1394327931355222020, 'Usr_loc': '🌎', 'hashtags': []}
{'text': 'RT @Sukaberisik: Mutualan? All fandom gas terutama MY, midzy, nctzen, engene, army. Help rt/like thanks.', 'id': 1394327931300716550, 'Usr_loc': 'he/him. 18. asian.', 'hashtags': []}
{'text': 'RT @SCryptoschool:  herb  @PandFinance \n\n herb  $PAND connect all people around the world without any limitation and no matter where you live!\n\n herb  Pan…', 'id': 1394327931346833408, 'Usr_loc': None, 'hashtags': []}
{'text': 'when blue banisters has the same sound as nfr and cocc and y’all realize that it’s lanas problem and not jacks or a… https://t.co/yMLpKP7o9j', 'id': 1394327931279839234, 'Usr_loc': 'she/her', 'hashtags': []}
{'text': '@evnhsn @akkhosh @minazargham @ErielleDelzer @SherpaHossainy @kayvz @JoannaG @leostamillo @jamesglynn @imdarrick… https://t.co/YAaihIwwXj', 'id': 1394327931388891145, 'Usr_loc': '🇬🇧 via 🇧🇪 🇹🇷', 'hashtags': []}
{'text': 'RT @Farah_Gazan: Nonstop heavy airstrikes since yesterday, all around Gaza, on the streets and infrastructure, citizens houses, cars, peopl…', 'id': 1394327931204276226, 'Usr_loc': 'she/her 18', 'hashtags': []}
{'text': 'RT @whatifiwasblack: Good morning everyone. I hope you all have an amazing day. If nobody’s told you today, you are a beautiful person. Man…', 'id': 1394327931527249923, 'Usr_loc': 'Mississippi, USA', 'hashtags': []}
{'text': "RT @yanidedios: It's a simple and humble studio. Hindi bongga pero we are so so so happy and proud. Starting little by little..all for the…", 'id': 1394327931594280960, 'Usr_loc': None, 'hashtags': []}
{'text': "RT @barbiekushh: Barbz seriously real need to start respecting 69 more, he is one of few celebrities that promoted her mixtape. Y'all stead…", 'id': 1394327931477020678, 'Usr_loc': None, 'hashtags': []}
{'text': 'i’m in pain', 'id': 1394327931543949316, 'Usr_loc': ' they/he/ve 22 bIm', 'hashtags': []}
{'text': 'RT @rahulroushan: Direct Action Day mein is baar dhimmis bhi participate karenge?', 'id': 1394327931606888451, 'Usr_loc': 'Latur, India', 'hashtags': []}
{'text': '@itsnickcharles First of all  face_with_steam_from_nose  I have a telly it’s 55” same size as my dick! SECOND, eating ass is still eating  face_with_steam_from_nose  face_with_steam_from_nose ', 'id': 1394327931590221824, 'Usr_loc': 'London', 'hashtags': []}
{'text': "@ryandaly01 But the REAL question we're dying to find the answer to is... since it's a newer DC animated project, d… https://t.co/OGPkbfXLWP", 'id': 1394327931573477376, 'Usr_loc': 'Battle Creek, MI', 'hashtags': []}
{'text': 'RT @applechim_: "Y\'all take cbs seriously" that\'s why it\'s always successful  loudly_crying_face  2+2=4', 'id': 1394327931611197442, 'Usr_loc': 'they/them', 'hashtags': []}
{'text': "RT @exo_statistics: 'DON'T FIGHT THE FEELING' has now surpassed 108 THOUSAND (108,000) pre-orders on Ktown4u alone!\n\nPB 1 - 43,576\nPB 2 - 3…", 'id': 1394327931955007489, 'Usr_loc': 'Republic of Korea', 'hashtags': []}
{'text': 'RT @Ravenn000: if u have the secrets to life just say that', 'id': 1394327931674107906, 'Usr_loc': None, 'hashtags': []}
{'text': 'RT @ANI: Late in the night and early morning, they tried their level best. All 9 people have been lifted. They are safe &amp; healthy. I congra…', 'id': 1394327932068274179, 'Usr_loc': 'Bengaluru South, India', 'hashtags': []}
{'text': 'RT @Intergrity56: Nigerian Courts are closed indefinitely. Justice is on vacation. person_facepalming \u200d male_sign ️ \n\nJust imagine the impact of this on all awaiting tr…', 'id': 1394327932064174084, 'Usr_loc': 'Nigeria', 'hashtags': []}
{'text': 'RT @ohcauseshesdead: CDC this.... CDC that ... when you gonna c that I’m the one who understands you been here all along so why can’t you s…', 'id': 1394327932017909760, 'Usr_loc': None, 'hashtags': []}
{'text': 'RT @Morgz5631: Why do Prost and Senna have equal pace but Senna has the better awareness!?\n\nSenna is the quicker driver as a whole but he w…', 'id': 1394327932030521345, 'Usr_loc': None, 'hashtags': []}
{'text': 'RT @marothi_vincent: We all start somewhere, and we donʼt stop. https://t.co/ijkMjVPUrB', 'id': 1394327932076793857, 'Usr_loc': 'Newcastle, South Africa', 'hashtags': []}
{'text': 'RT @thetimes: “Israel is killing innocent children. When my children went to sleep, they were hoping that when they woke up it would all be…', 'id': 1394327932051537926, 'Usr_loc': 'Mogadishu somalia', 'hashtags': []}
{'text': 'Y’all that’s my baby Lulu 🥺 red_heart ️', 'id': 1394327932051628035, 'Usr_loc': 'Caesarea/Al-Malha 🇵🇸', 'hashtags': []}
{'text': 'The radical left communist swamp is showing their true colors on Israel, they are all in on the Palestinian side an… https://t.co/1iq8174NXt', 'id': 1394327931892092933, 'Usr_loc': 'Arizona, USA', 'hashtags': []}
{'text': "RT @AimThaMachine_: @Tife_fabunmi @_Oroboghene Guys, I think we all should get our consent forms in order. It's now essential more than eve…", 'id': 1394327934769500164, 'Usr_loc': 'Obada, Nigeria', 'hashtags': []}
{'text': ')does this make any sense at all)', 'id': 1394327934853394432, 'Usr_loc': 'she/her!18', 'hashtags': []}
{'text': '@lakopipo All tours Eiffels are trash', 'id': 1394327934870200324, 'Usr_loc': '☀🦥🦥☀ ', 'hashtags': []}
{'text': 'Bridge/Tunnel Stoppage: WB on I-64 at I-64 Tunnel-HRBT W in Norfolk. All WB travel lanes closed. Potential Delays. 12:24PM', 'id': 1394327935033692162, 'Usr_loc': 'Hampton Roads', 'hashtags': []}
{'text': "RT @corpseclipsy: The way it all started just because Abe couldn't finish his prompt and Scarra drew Corpsekkuno holding hands  raised_hand  loudly_crying_face  https://t…", 'id': 1394327935071358979, 'Usr_loc': 'Earth', 'hashtags': []}
{'text': 'when y’all needa b takin advice from me', 'id': 1394327935155195904, 'Usr_loc': 'Bay Area, CA', 'hashtags': []}
{'text': 'RT @AnnieSage: And this is why I absolutely don’t trust the “screw everyone else” covid is a hoax crowd to adhere to any guidelines at all.…', 'id': 1394327935092355077, 'Usr_loc': 'Denver, CO', 'hashtags': []}
{'text': 'RT @lolaloveandart: Some people agreed and caused a food blockade. Not a single northern politician remembered "One Nigeria". The twitter m…', 'id': 1394327935046279176, 'Usr_loc': 'Port Harcourt.', 'hashtags': []}
{'text': 'RT @MsRoyalY: Y’all Grey still saying thank you and he be eating good af https://t.co/CBhJ2omDfF', 'id': 1394327935163637766, 'Usr_loc': 'she/they', 'hashtags': []}
{'text': 'RT @jannabartolome: crazy how trauma makes u push \npeople away when all u want is love', 'id': 1394327935281111047, 'Usr_loc': 'Kuala Lumpur City', 'hashtags': []}
{'text': 'Y’all lemme tell you they’re gonna announce that end of service will be on the 30th because i have the worst luck in the existence', 'id': 1394327935289544714, 'Usr_loc': 'the kanserued place', 'hashtags': []}
{'text': '@I_Scotch_I @BBCchrismclaug Hey dude. Agenda is the plural of agendum and doesn’t need pluralisation. In modern ver… https://t.co/Yde1RJ1cxq', 'id': 1394327934861778946, 'Usr_loc': 'section 101', 'hashtags': []}
{'text': 'RT @MsRoyalY: Y’all Grey still saying thank you and he be eating good af https://t.co/CBhJ2omDfF', 'id': 1394327935314632706, 'Usr_loc': None, 'hashtags': []}
{'text': 'But a lot of y’all slow  upside-down_face ', 'id': 1394327935339966467, 'Usr_loc': 'Illinois', 'hashtags': []}
{'text': 'RT @soledadobrien: “Some” seems to be one dude.', 'id': 1394327935226626050, 'Usr_loc': 'PA', 'hashtags': []}
{'text': '@Thediamondtmac0 In this game, you can experience the excitement of Resident Evil. https://t.co/edujs4kIbl', 'id': 1394327935285350402, 'Usr_loc': None, 'hashtags': []}
{'text': 'These voice actors are all Hispanic, correct? https://t.co/vnkm93FFQ5', 'id': 1394327934824030211, 'Usr_loc': 'New Jersey, USA', 'hashtags': []}
{'text': 'RT @SHUBHANKITSRIV4: Families are like branches of a tree. We grow differently but our root remains the same.Thank you Corona warriors for…', 'id': 1394327935482351619, 'Usr_loc': None, 'hashtags': []}
{'text': 'Today at @RevZilla, Spenser test rides the new 2021 @HondaPowersprts CRF300L and CRF300L Rally. They get a boost in… https://t.co/s7TEUcCBNH', 'id': 1394327935159611394, 'Usr_loc': 'Bexley, Ohio, U.S.A.', 'hashtags': []}
{'text': 'Bf felt the touch and his expressiom turned into terrified. He was scared after witnessed the whole scary + suprisi… https://t.co/WS1UMBWQfu', 'id': 1394327935406936069, 'Usr_loc': None, 'hashtags': []}
{'text': '@LindseyPelas All the rage apparently', 'id': 1394327935583129603, 'Usr_loc': None, 'hashtags': []}
{'text': 'RT @iitsLaa: all it takes is a “you won’t” and boom there I go', 'id': 1394327935461511172, 'Usr_loc': 'Chicago, IL', 'hashtags': []}
{'text': "@pulte Hey y'all! Just hoping for a little bit of help to get by this month, short on rent and a few bills and groc… https://t.co/a9ojsP3JVt", 'id': 1394327934941507588, 'Usr_loc': 'Athens, GA', 'hashtags': []}
{'text': "RT @EmeraldRobinson: Bill Gates visited Jeffrey Epstein's NYC house DOZENS OF TIMES.\n\nWe all know what that means!\n\nRIP: Bill Gates.\n\nhttps…", 'id': 1394327935687950336, 'Usr_loc': 'San Diego, CA', 'hashtags': []}
{'text': 'RT @MarieAnnUK: Fun Fact: All Wetherspoons pubs are microwave food-serving stale ale-distributing employee-exploiting sticky-floored Worzel…', 'id': 1394327935633461249, 'Usr_loc': 'Chester, England', 'hashtags': []}
{'text': 'I forgot how horny going to the gym makes me… the daddies in skin tight clothes with their VPL and hard nips covere… https://t.co/3q3BRz4Rhq', 'id': 1394327935759392773, 'Usr_loc': 'Atlanta, GA', 'hashtags': []}
{'text': 'Bridge/Tunnel Stoppage: WB on I-64 at I-64 Tunnel-HRBT W in Norfolk. All WB travel lanes closed. Potential Delays. 12:24PM', 'id': 1394327935914586123, 'Usr_loc': 'I-64 VA', 'hashtags': []}
{'text': 'RT @EXOPublicity: 200$ for EXO ComeBack If we get 20k likes  fire   Can we do it as fast as possible?  thinking_face  We have only 20Days left from CB sneezing_face lets do…', 'id': 1394327935927029760, 'Usr_loc': "that's okay - D.O. (LIVE)", 'hashtags': []}
{'text': 'In Taunggyi, Shan State, junta thugs inspect all the bypassing vehicles in front of Hnin Lwin Lwin Photography shop… https://t.co/9qjcd1k1J4', 'id': 1394327935847260161, 'Usr_loc': 'Singapore', 'hashtags': []}
{'text': "Well it's all done, and the marking has begun. Thank goodness this bit of the non-exam ordeal is over for the young… https://t.co/2oSJS0K7oI", 'id': 1394327935704780804, 'Usr_loc': 'Ayrshire, UK', 'hashtags': []}
{'text': '@JimSterling You can claim all you want your subs left after you came out but it started last year when you stagnat… https://t.co/ZOM5vDtezr', 'id': 1394327935901913091, 'Usr_loc': 'Ottawa', 'hashtags': []}
{'text': 'good morning y’all I hope everyone is feeling good  grinning_face_with_smiling_eyes  Yesterday was a lil overwhelming for me ngl so I hope today wi… https://t.co/sQHKtYRocZ', 'id': 1394327935570620424, 'Usr_loc': 'black - sapphic ', 'hashtags': []}
{'text': 'Dang Man! I Was So Happy Packin My Shit Then Realized It Was Da Mayor!  crying_face  *Unpacks Bags*', 'id': 1394327936031985667, 'Usr_loc': 'Dubai, United Arab Emirates', 'hashtags': []}
{'text': '@ShakoDoggo Hi all have a group growing slowly but you are very welcome to join if you want too nice group good bun… https://t.co/dAl7aMr7cO', 'id': 1394327935935463434, 'Usr_loc': None, 'hashtags': []}
{'text': '@k7nji Pc unlock all sheesh hmu', 'id': 1394327936061349891, 'Usr_loc': 'Leeds, England', 'hashtags': []}
{'text': 'RT @DailyExposeNews: Lawyers and Medical Experts worldwide say they have all the evidence they need to convict WHO, CDC, PHE, Bill Gates an…', 'id': 1394327936031985664, 'Usr_loc': 'Great Britain', 'hashtags': []}
{'text': 'RT @KIWIBYUL: to everyone who has assignments due or exams around the time of mamamoo’s comeback i wish you all the best and let’s use the…', 'id': 1394327936216440832, 'Usr_loc': 'she/her - bianca', 'hashtags': []}
{'text': 'RT @lastnightsnora: I’m the friend you can cancel on, it’s definitely ok I won’t be mad at all', 'id': 1394327936208097293, 'Usr_loc': None, 'hashtags': []}
{'text': '@dracosv2 @Deggstar11 All facts*', 'id': 1394327936212246532, 'Usr_loc': 'Any Pronouns ', 'hashtags': []}
{'text': 'and end military trade and free trade agreements that assist in the maintenance of israeli apartheid as well. bds —… https://t.co/C9UjZ674iq', 'id': 1394327936103235588, 'Usr_loc': '20 ✧ infp ✧ she | her ☽༓･*˚⁺‧͙', 'hashtags': []}
{'text': "RT @lmorchard: * grapes don't drink wine\n* diamonds can't wear themselves\n* olives can't taste oil\n* seeds die if they don't reach the ligh…", 'id': 1394327936182808576, 'Usr_loc': 'Black Trans Lives Matter', 'hashtags': []}
{'text': 'RT @LaurenJauregui: the US with the militarization of the police is in direct correlation with our hand in what we have witnessed happen al…', 'id': 1394327936149381122, 'Usr_loc': 'tatooine ', 'hashtags': []}
{'text': 'We all dumber thennnaaaaaa bitch for that one mf  rolling_on_the_floor_laughing  smiling_face_with_open_mouth_&_cold_sweat  person_tipping_hand  medium-dark_skin_tone \u200d female_sign ️', 'id': 1394327936229072896, 'Usr_loc': 'in my bag not my feelings 🥱', 'hashtags': []}
{'text': 'RT @757Cinco: All in till there’s nothin left  person_walking  medium_skin_tone \u200d male_sign ️ american_football  https://t.co/6S1Vj1SBwk', 'id': 1394327936346509314, 'Usr_loc': None, 'hashtags': []}
{'text': 'RT @Omar_Gaza: I come from a media background, media agencies has every right to be mad at Israel for destructing 90% of their offices dema…', 'id': 1394327936434675719, 'Usr_loc': None, 'hashtags': []}
{'text': 'RT @QuezRene: Sexually transmitted depression', 'id': 1394327936359182339, 'Usr_loc': 'Bradenton, FL', 'hashtags': []}
{'text': 'RT @ShamRahmaniac: Two of the all time greatest  smiling_face_with_heart-eyes  fire  https://t.co/U4Gyin7G7v', 'id': 1394327936375787523, 'Usr_loc': None, 'hashtags': []}
{'text': '@AnthonyTWilson @SteCansAndBans All over sounes haha', 'id': 1394327938926010374, 'Usr_loc': None, 'hashtags': []}
{'text': 'RT @KTRTRS: Glad we could help Vinod  thumbs_up  Wish your friend a speedy recovery', 'id': 1394327938930155524, 'Usr_loc': 'Alwal. ', 'hashtags': []}
{'text': 'RT @onyour_via: Haiiii mari mutualan all fandom, esp exol, nctzen, wayzenni,shawol,reveluv,elf, sm stan....kalo lewat bantu rt/like thanks…', 'id': 1394327939097923589, 'Usr_loc': None, 'hashtags': []}
{'text': 'RT @sbc_tips: Massive shoutout to all the FIFA Streamers that spend hours off stream grinding out packs for their viewers to watch.\n\nSo muc…', 'id': 1394327939118886916, 'Usr_loc': None, 'hashtags': []}
{'text': 'Dougie Damage does it again!!! clown_face  clown_face ', 'id': 1394327939005702146, 'Usr_loc': None, 'hashtags': []}
{'text': "RT @pissboo: You guys are all about mental health awareness until it's something you don't understand. Fun fact, just because you don't und…", 'id': 1394327939227979777, 'Usr_loc': '#BPDAwarenessMonth', 'hashtags': []}
{'text': '@Karam5757 @MohamedNasheed Congratulations and All the best!!!', 'id': 1394327939257298950, 'Usr_loc': 'Maldives', 'hashtags': []}
{'text': '@karma8110 @NeaStrangelove @futureofsexshow To clarify, though: for me, Gynoids are preferable to Dolls, as they ca… https://t.co/9cRLA7Rn0Q', 'id': 1394327939148308480, 'Usr_loc': 'The land is my habitat', 'hashtags': []}
{'text': 'RT @ScottZILWarrior: I will send one random person $500 in 48hrs all you have to do is RT and be following myself &amp; @ispolink \n\nShow the sp…', 'id': 1394327939391569921, 'Usr_loc': None, 'hashtags': []}
{'text': 'RT @chenniepii: funfact: ChenBar, together with some csoons and a sm employee wrote a whole article for Jongdae back then in 2013 all about…', 'id': 1394327939462799366, 'Usr_loc': '종대의 심장', 'hashtags': []}
{'text': 'RT @Farah_Gazan: Nonstop heavy airstrikes since yesterday, all around Gaza, on the streets and infrastructure, citizens houses, cars, peopl…', 'id': 1394327939454492680, 'Usr_loc': 'morocco', 'hashtags': []}
{'text': 'RT @conductress: Fuck cancer. That is all.', 'id': 1394327939450163202, 'Usr_loc': 'Surrey, BC', 'hashtags': []}
{'text': 'RT @BlinkVotingCrew: [  inbox_tray  BBMAs2021\xa0 | 2ND WAVE  water_wave  ]\n\n megaphone  BLINKs the 2ND MASS VOTING for BBMAs has started. Maximize your 10 votes and use all…', 'id': 1394327939567783937, 'Usr_loc': None, 'hashtags': []}
{'text': 'RT @waymoflydenuu: The funniest part is he be having proof lmao', 'id': 1394327939488043010, 'Usr_loc': None, 'hashtags': []}
{'text': 'RT @gaialect: i understand we all come from different walks of life and upbringing but i am genuinely too sensitive to be friends with peop…', 'id': 1394327939693514754, 'Usr_loc': None, 'hashtags': []}
{'text': '@DrKarlynB @LPMisesCaucus They also proven that time and time again... that the majority of their elected represent… https://t.co/ukS3UBgcfo', 'id': 1394327939563491337, 'Usr_loc': 'WA', 'hashtags': []}
{'text': 'RT @FrenchGaymer: Good day to all  thumbs_up  fire  face_with_stuck-out_tongue  \n@LucasEnt  https://t.co/BR6Ms1ynqa @RuslanAngelo @KillianAdam \n/  @ShabazzFan @AussieManGay1  @dilf2…', 'id': 1394327939655819266, 'Usr_loc': None, 'hashtags': []}
{'text': "RT @mochicubby: ❞〖  sun ️Day 10 sun ️〗❞\n ✎ Q: fav part vocal of hc?\n    A : haechan high note vocal part in 90's love is my favorite, it makes me a…", 'id': 1394327939802566656, 'Usr_loc': 'byf ', 'hashtags': []}
{'text': '@GOPLeader McCarthy is full of shit. It’s just a misogynist talking point. Oh put all the male dominated jobs on a… https://t.co/k5AMbcpZpo', 'id': 1394327939798474752, 'Usr_loc': None, 'hashtags': []}
{'text': 'RT @nicxle2sly: They don’t make y’all like this no more  sleepy_face  https://t.co/td5MFTcJTB', 'id': 1394327940050063371, 'Usr_loc': 'El Paso, TX', 'hashtags': []}
{'text': 'RT @TheAnuragTyagi: 1million target complete of tweets Still trending thanks to all who help us, This is student power flexed_biceps  #modiji_cancel12thb…', 'id': 1394327940071002112, 'Usr_loc': None, 'hashtags': []}
{'text': '@JoshuaLeePwllJr All the time  person_shrugging  rolling_on_the_floor_laughing  face_with_tears_of_joy  https://t.co/b4FXscvsX5', 'id': 1394327939421024258, 'Usr_loc': None, 'hashtags': []}
{'text': 'RT @mcuban: Things to know about all markets.  Buying on Margin giveth, Margin Calls taketh away even more, faster.  Rumors giveth. News ta…', 'id': 1394327940066734081, 'Usr_loc': None, 'hashtags': []}
{'text': 'RT @bynhyuk: bobby reminding you all that hanbin and ikon are in this for life', 'id': 1394327939995475969, 'Usr_loc': None, 'hashtags': []}
{'text': "RT @daksinvrindavan: Here is a small video from today's evening feeding of cows. May the cows bless @sureshtc for he has sponsored the food…", 'id': 1394327940171657220, 'Usr_loc': 'Mumbai🇮🇳', 'hashtags': []}
{'text': 'RT @MahmudOfGhazni: We need to learn from Arvind Kejriwal, Manish Sisodia and Raghav Chadha, how to keep a straight face and pretend all is…', 'id': 1394327940175785984, 'Usr_loc': 'Cuttack, Odisha, India', 'hashtags': []}
{'text': 'In Taunggyi, Shan State, junta thugs inspect all the bypassing vehicles in front of Hnin Lwin Lwin Photography shop… https://t.co/qpc41J87ul', 'id': 1394327940029157385, 'Usr_loc': None, 'hashtags': []}
{'text': 'RT @ruelsprtridge: kiss me more is a banger idc what y’all say', 'id': 1394327940188491779, 'Usr_loc': None, 'hashtags': []}
{'text': 'RT @RedWingGrips: You guys do realize that the reason the CDC rolled back all of these restrictions and guidelines with zero explanation is…', 'id': 1394327940134019080, 'Usr_loc': None, 'hashtags': []}
{'text': 'it’s literally been three hours stfu ab that “in my past” shit fuck off', 'id': 1394327940217802756, 'Usr_loc': 'she/her | 18 | pisces ', 'hashtags': []}
{'text': 'RT @Abhishe50965999: All the love you had given to others selflessly, is coming back to you\n\nSSR Heartbeat Of SSRians https://t.co/zFajuSfJ…', 'id': 1394327940175831042, 'Usr_loc': None, 'hashtags': []}
{'text': 'RT @aslavitt46: COVID Update: It appears that cases are down in all 50 states.', 'id': 1394327940389801984, 'Usr_loc': 'New York, USA', 'hashtags': []}
{'text': '@TinaMax8 @garvangrant All appointed to to top gigs', 'id': 1394327940310212610, 'Usr_loc': 'Ireland', 'hashtags': []}
{'text': 'RT @hala_ghanim1: @GeeNelly Thank you very much for your contribution to spreading awareness.  Thank you with all my heart.  I hope the wor…', 'id': 1394327940339482631, 'Usr_loc': None, 'hashtags': []}
{'text': 'RT @dykesforharry: people act like harry is incapable to deliver a worthy performance just bc he’s acting alongside the rising stars of the…', 'id': 1394327940326907906, 'Usr_loc': 'harrys left dimple she/her 26', 'hashtags': []}
{'text': 'RT @GuinnChastity: Where the F is Biden and Harris this week? There’s an all out war breaking out with one of our allies in the Middle East…', 'id': 1394327940368830466, 'Usr_loc': 'United States', 'hashtags': []}
{'text': "RT @Schmeelk: 6. You need Rose out there with Young as much as possible to take advantage of Young's poor D. To help Rose defensively, I be…", 'id': 1394327940498870274, 'Usr_loc': 'Crying at MSG', 'hashtags': []}
{'text': 'RT @fitzbits64: Ryan Starr has four wins and an ERA of 1.28 and has whiffed 57 in 38 innings; Avon has awesome pitching which could carry i…', 'id': 1394327940549197829, 'Usr_loc': 'Avon, OH', 'hashtags': []}
{'text': "RT @exo_statistics: 'DON'T FIGHT THE FEELING (Expansion Ver.)' has now surpassed 20,000 CUMULATIVE pre-orders on Ktown4u alone. 🥳\n\n— It's t…", 'id': 1394327940511375366, 'Usr_loc': None, 'hashtags': []}
{'text': "@maazi_chinedu Why you all crying yen yen yen yen yen..\nSmall slap oh.\nHis hand didn't even touch her well.", 'id': 1394327940494766081, 'Usr_loc': 'Abuja, Nigeria', 'hashtags': []}
{'text': '@SamuelK77894064 @iMiaSanMia Ah i see. I think Tuchel will want to play with a 4-3-3 tbh in the future. If you sell… https://t.co/1LqYhBh9ad', 'id': 1394327940536676357, 'Usr_loc': 'Behind You.', 'hashtags': []}
{'text': 'RT @Farah_Gazan: Nonstop heavy airstrikes since yesterday, all around Gaza, on the streets and infrastructure, citizens houses, cars, peopl…', 'id': 1394327940683354115, 'Usr_loc': None, 'hashtags': []}
{'text': 'RT @jhsIevi: i just think that they adore and love with hobi than all of us. https://t.co/Q3JyUTgLoc', 'id': 1394327940683292674, 'Usr_loc': None, 'hashtags': []}
{'text': 'RT @MarkFarmaner: Very welcome to see the British government @DominicRaab making this call to companies around the world. \n\n"The UK calls f…', 'id': 1394327940633186305, 'Usr_loc': None, 'hashtags': []}
{'text': 'RT @HackneyAbbott: Campaigning for the Labour leadership \u2066in 2020 Keir Starmer\u2069 said: “We should treat 2017 manifesto as our foundational d…', 'id': 1394327940775743488, 'Usr_loc': 'North Wales', 'hashtags': []}
{'text': 'RT @SAbdeshahian: y’all think palestine is complicated but know everything about the marvel cinematic universe  loudly_crying_face  loudly_crying_face  loudly_crying_face ', 'id': 1394327940847083526, 'Usr_loc': None, 'hashtags': []}
{'text': 'Y’all people w Septum’s, How bad did it hurt to get 1-10? And how bad was the healing process?', 'id': 1394327940905803780, 'Usr_loc': 'On vacation', 'hashtags': []}
{'text': 'RT @misanthropicc92: Someone once said Twitter is the sociology seminar where no one has done the reading but everyone is speaking. I think…', 'id': 1394327943166402568, 'Usr_loc': 'Canto XIII', 'hashtags': []}
{'text': '@CoffeeattackNFT @mbl267_NFT Now all the OG’s have to somehow see value in the MP and start spending $ there. Or ju… https://t.co/dWBvkTWEoE', 'id': 1394327943044681730, 'Usr_loc': None, 'hashtags': []}
{'text': 'Nothing good ever comes from staying in your comfort zone..\n\nIt’s a really weird irony but taking no risks in life… https://t.co/VXJyVJYIav', 'id': 1394327943187419155, 'Usr_loc': 'Manchester UK', 'hashtags': []}
{'text': 'RT @LomanStriker: @Timcast One unverified anecdote should not carry more weight than all tens of millions of people who have been vaccinate…', 'id': 1394327943292145665, 'Usr_loc': None, 'hashtags': []}
{'text': "RT @kathleengorma13: @healcomplexptsd @crys_tom @WordsandGuitar @TanyaTalaga @helen_knott Here are some others.....I have so many it's impo…", 'id': 1394327943405441029, 'Usr_loc': 'Vancouver, British Columbia', 'hashtags': []}
{'text': 'Let’s all ‘Just say no’ face_with_tears_of_joy 🤨', 'id': 1394327943300661253, 'Usr_loc': 'West Sussex', 'hashtags': []}
{'text': 'RT @cryptopolica: $75 Total Giveaway! • Ends in 72 hours\n\n$50:\n1. Follow me &amp; @TokenScorpion\n2. Retweet this &amp; their pinned  pushpin  \n\n+ $25:\n1. J…', 'id': 1394327943317393410, 'Usr_loc': None, 'hashtags': []}
{'text': "Y'all these parents don't give a fuck !!! We could be on a damn boat they still gone bro g they kids  face_with_tears_of_joy ", 'id': 1394327943451717637, 'Usr_loc': 'The Space City', 'hashtags': []}
{'text': 'getting anxiety abt being pretty much ed recovered on ed twt bc of all this stuuuuupid drama', 'id': 1394327943493701637, 'Usr_loc': 'in my head', 'hashtags': []}
{'text': 'RT @DeanAyass: As pubs reopen indoors today, please remember how Wetherspoons told all of their staff to get fucked and find a job in Tesco…', 'id': 1394327943342665731, 'Usr_loc': 'England, United Kingdom', 'hashtags': []}
{'text': 'RT @nghsbio: Year 10 all had a fantastic go at this year’s Biology Challenge 2021, well  done to all those who participated and the we look…', 'id': 1394327943464239104, 'Usr_loc': "Nottingham Girls' High School", 'hashtags': []}
{'text': "RT @RapperVocalist: I'll give you few examples why we believe that yg isn't treating jennie the way y'all think it is. From Solo's achievem…", 'id': 1394327943359303684, 'Usr_loc': None, 'hashtags': []}
{'text': 'RT @Alfreddezayas: The never-ending Isareli-Palestinian "crisis" is not only a tragedy for Israelis and Palestinians, it is a tragedy for a…', 'id': 1394327943489327104, 'Usr_loc': None, 'hashtags': []}
{'text': 'RT @AndisMom4: Think about this for a minute.  Of all the people closely connected to Diana - sisters, brother, friends, PC, PW, HM, etc. -…', 'id': 1394327943405608963, 'Usr_loc': 'Seattle, WA', 'hashtags': []}
{'text': 'Yea @BinoRideaux tell @defjam to stop deleting our pages. We just showing love smh', 'id': 1394327943384469518, 'Usr_loc': None, 'hashtags': []}
{'text': 'RT @nikissama: who made ni-ki this happy, who made him laugh like this...? y’all, the genuine happiness  frowning_face ️ frowning_face ️ frowning_face ️ frowning_face ️ frowning_face ️ https://t.co/ybXmN8IWfJ', 'id': 1394327943476826118, 'Usr_loc': 'hee heart', 'hashtags': []}
{'text': 'RT @Yung_Poke_Gawd: Didn’t know rapping was a thing in 1960, it’s almost like this meme was made by a racist yt kid who wants to dunk on an…', 'id': 1394327943581687808, 'Usr_loc': 'Charlotte, NC', 'hashtags': []}
{'text': 'RT @ShehnaazShineFC:  folded_hands  medium-light_skin_tone  red_heart ️ folded_hands  medium-light_skin_tone \nSpread the word.\n\nHope the help reaches to needy folded_hands  medium-light_skin_tone \nGod Bless Us All in this tough times.\n@ishehnaaz_gill #Shehn…', 'id': 1394327943665516548, 'Usr_loc': None, 'hashtags': []}
{'text': '@maha2021jaya Superstar is stalin as all goes to him (not to govt).', 'id': 1394327943657123843, 'Usr_loc': None, 'hashtags': []}
{'text': '@lovelyjeup @I_M_F_A_C_T @IFs_twt It’s all so beautifulllll!!', 'id': 1394327943590068224, 'Usr_loc': None, 'hashtags': []}
{'text': "RT @gemmygemg: At the end of the day you've got to ask yourself what the end goal and aim for all this self pity bs is, because it seems li…", 'id': 1394327943606771718, 'Usr_loc': 'Neverland', 'hashtags': []}
{'text': 'RT @bigbbyspree: Y’all laugh at Soulja Boy but he deadass was the first rapper to do mad shit', 'id': 1394327943686594566, 'Usr_loc': 'Kansas City, MO', 'hashtags': []}
{'text': 'RT @GautamGambhir: Ppl of Delhi returned concentrators after recovery &amp; now they are being used by hospitals. Hope all patients get better…', 'id': 1394327943741009925, 'Usr_loc': None, 'hashtags': []}
{'text': "RT @TradesTrey: I'm lookin' at you shitadel, and so is Mark Cuban https://t.co/LaOMVaIEwI", 'id': 1394327943699120132, 'Usr_loc': None, 'hashtags': []}
{'text': "RT @WillGWatters: no worries\ntoo big \nor too small\nI'll take them all\non my shoulders\nso you can rest.", 'id': 1394327943862800387, 'Usr_loc': 'Israel', 'hashtags': []}
{'text': 'RT @GraduatedBen: You are to bow in reverence to the journos who figured something out a year after anon twitter posters told you all about…', 'id': 1394327943640346625, 'Usr_loc': 'Weed, CA', 'hashtags': []}
{'text': 'RT @rebelleflowerr_: I can’t wait to be married &amp; be ducked off with my husband &amp; never talk to y’all ever again', 'id': 1394327943757828097, 'Usr_loc': 'Baltimore, MD', 'hashtags': []}
{'text': '@minimaxi777 @DB_Legends Awesome concept but I’d still wish I had access to all of them and change my transformation at will', 'id': 1394327943921512451, 'Usr_loc': None, 'hashtags': []}
{'text': 'RT @northernlad_45: THANK YOU GUYS FOR 100 FOLLOWERS I LOVE YOU ALL  red_heart ️ red_heart ️ red_heart ️ Enjoy this little moaning audio  smirking_face 🥰 https://t.co/Pj30aiou0W', 'id': 1394327943762034695, 'Usr_loc': 'United Kingdom', 'hashtags': []}
{'text': 'RT @Spicydoug: I’m tired of y’all fighting over who gets to be black', 'id': 1394327943887863812, 'Usr_loc': 'Richmond, VA', 'hashtags': []}
{'text': 'RT @rajasekharv1979: All this started after Sadhguru Jaggi Vasudev filed a PIL seeking an open audit of the temple property management in T…', 'id': 1394327943963365378, 'Usr_loc': None, 'hashtags': []}
{'text': 'RT @Goss30Goss: Good morning everyone. Hope you all have a wonderful week.\n\nExcept Matt Gaetz.\n\nAnd Kevin McCarthy. \n\nAnd Dan Crenshaw.\n\nAn…', 'id': 1394327944043114497, 'Usr_loc': 'texas', 'hashtags': []}
{'text': 'RT @blessadj: Bro. After all these years I was just clicking for luck https://t.co/lBf0Y7dVHZ', 'id': 1394327944097640448, 'Usr_loc': None, 'hashtags': []}
{'text': 'RT @coachcurtis42: NEW MCRECRUIT \nDesmond Reid 2022 \n1ST TEAM ALL BROWARD \nSLOT/ KICK &amp;PUNT RETURNER\n5’7 175\n3.3 GPA\nBENCH 250 SQUAT 380\nCL…', 'id': 1394327944013787140, 'Usr_loc': None, 'hashtags': []}
{'text': '@Tumshy85 @ScotlandNT Billy barely plays  person_shrugging \u200d male_sign ️ get Gauld in over him, consistent all season', 'id': 1394327944173076482, 'Usr_loc': None, 'hashtags': []}
{'text': 'RT @InuKishu: We will be doing an official Rebrand of our current logo on all of our social media platforms and will be updating it across…', 'id': 1394327944059756544, 'Usr_loc': 'Hawaii, USA', 'hashtags': []}
{'text': 'RT @JesHealy: To all the brave Palestinians,\nMy whole heart and prayers are with you. You will be free. You are stronger and more capable t…', 'id': 1394327944164777992, 'Usr_loc': 'Pakistan', 'hashtags': []}
{'text': 'RT @chikenwiener: hate 2 inform all My haters but i am Sexier than You by a long shot', 'id': 1394327944227610628, 'Usr_loc': None, 'hashtags': []}
{'text': 'RT @JusticeTierney: do y’all even know what white passing means???? https://t.co/5RIaROthru', 'id': 1394327944265453573, 'Usr_loc': 'i think im lost', 'hashtags': []}
{'text': '@momof3inpa @smerconish No thanks at all!! Only thanks for lying  lying_face  to people and confusing the public about CoVID.… https://t.co/frHHptosI8', 'id': 1394327944269504517, 'Usr_loc': None, 'hashtags': []}
{'text': 'RT @MoonHonsool: Calling all desis, I present to you guys, my Butter promotional video https://t.co/BFZrHTqyW0', 'id': 1394327944428867586, 'Usr_loc': None, 'hashtags': []}
{'text': "@wakariowa So we've been white all long! Using a fork and knife does the trick, huh!! @juliusmaithya2 @Peter1Karanja @swatkariuki", 'id': 1394327944370311171, 'Usr_loc': 'Nairobi, Kenya', 'hashtags': []}
{'text': 'RT @Tyson_Fury: Time to take back what I never lost.\n\nEvery belt there all mine chump! https://t.co/nBDYizOlGX', 'id': 1394327944449904643, 'Usr_loc': None, 'hashtags': []}
{'text': '@Vanessa_Sarges Its sad to see ignorance is world wide. If people adhered to lockdowns correctly we may never neede… https://t.co/B5qDQhQPG7', 'id': 1394327944441573378, 'Usr_loc': 'Hampshire ', 'hashtags': []}
{'text': 'RT @njmxdn: all fandom, ayo mutual! new acc\nhelp rt/like', 'id': 1394327947335520266, 'Usr_loc': 'she/her', 'hashtags': []}
{'text': 'RT @Local4News: A man who drove all the way from North Carolina to see a woman he met online was found passed out drunk in Port Huron with…', 'id': 1394327947339698180, 'Usr_loc': 'Ocean Beach ', 'hashtags': []}
{'text': '@RIO7QWS I MISS UTOO ,, I HAVE TO BE MORE ACTIVE LIEK SOME DAYS IM ON TWITTER ALL DAY BUT ON OTHER DAYS I DONT TOUC… https://t.co/py88Y0XbSZ', 'id': 1394327947268395015, 'Usr_loc': 'she/her| carib-japanese| minor', 'hashtags': []}
{'text': "Y'ALL EVEN THE WORLD CONCEPT PHOTOS ARE NOW IN HD JUST LOOK AT THIS https://t.co/OAKax7EKPQ", 'id': 1394327946945470471, 'Usr_loc': "he/they '01", 'hashtags': []}
{'text': '@wendycl51656219 @brithume Not if what we’ve seen all along in Florida  continues.', 'id': 1394327947398455299, 'Usr_loc': None, 'hashtags': []}
{'text': 'RT @tezilyas: Look at the photo, then study the detail: six year old girl pulled alive from the rubble of an Israeli air strike that KILLED…', 'id': 1394327947402616840, 'Usr_loc': None, 'hashtags': []}
{'text': 'RT @xxDanni2427xx: Happy Milf Monday from this big tit and big ass 49 year old curvy Milf Cougar!!  face_with_stuck-out_tongue_&_winking_eye   Retweet this if you love Milfs! Cum s…', 'id': 1394327947536908292, 'Usr_loc': None, 'hashtags': []}
{'text': 'The replies......how old are y’all', 'id': 1394327947432144906, 'Usr_loc': None, 'hashtags': []}
{'text': '@drsxr  victory_hand ️ smiling_face_with_sunglasses Why is he all muscled up?? Who makes this shit? What message does this send?', 'id': 1394327947423764483, 'Usr_loc': 'United States', 'hashtags': []}
{'text': 'You want to see crazy  face_with_rolling_eyes  unamused_face ', 'id': 1394327947440443396, 'Usr_loc': 'Ilorin, Nigeria', 'hashtags': []}
{'text': 'RT @alpacarto: 14 pages of Mei displaying all her emotions on her face. Its so hilarious  face_with_tears_of_joy  face_with_tears_of_joy  I feel blessed\nAnd she is so BEATIFUL in this c…', 'id': 1394327947570466824, 'Usr_loc': 'Salta, Argentina', 'hashtags': []}
{'text': 'All we do is smoke and fuck !', 'id': 1394327947817926658, 'Usr_loc': 'Tha Streets 🤍', 'hashtags': []}
{'text': 'I keep trying to imagine a future with me in it, but sometimes it’s very difficult! We are focused on a miracle, be… https://t.co/26j7fj3Ssf', 'id': 1394327947654295557, 'Usr_loc': 'Portland, OR', 'hashtags': []}
{'text': 'In Taunggyi, Shan State, junta thugs inspect all the bypassing vehicles in front of Hnin Lwin Lwin Photography shop… https://t.co/QRf0Fk3xN4', 'id': 1394327947620720644, 'Usr_loc': None, 'hashtags': []}
{'text': 'RT @TokenScorpion: SCORPION TOKEN PRESALE START TOMORROW\n\nhttps://t.co/bL1hD4RsKb\n\n fire  ALL UNSOLD TOKENS WILL BE BURNED\n locked  LIQUIDITY LOCKED 1…', 'id': 1394327947897565187, 'Usr_loc': 'she', 'hashtags': []}
{'text': "RT @_shadiam: how it started: my dad immigrating to the US in 1999. \nhow it's going: 3 MDs, all because of the strength my mom embodies. ht…", 'id': 1394327947897675777, 'Usr_loc': 'Krispy Kreme', 'hashtags': []}
{'text': '@loujaybee Personally I prefer\n\nconst reduced = {};\nfor (const v of blah) reduced[https://t.co/drQxCi6iNO] = v;\n\nno… https://t.co/XmE4PZggw2', 'id': 1394327947872542722, 'Usr_loc': 'London', 'hashtags': []}
{'text': "The best moment of JK's life is to see ARMY from the stage... Ohh jungkook..  smiling_face_with_heart-eyes  smiling_face_with_heart-eyes His life, his happiness all revolves… https://t.co/aJpQP4CPIM", 'id': 1394327947381665792, 'Usr_loc': 'Mumbai, India', 'hashtags': []}
{'text': 'RT @DailyMirror: All 185 places where Covid is rising amid Indian variant surge - see full list https://t.co/GpiPXxBTdz https://t.co/drULco…', 'id': 1394327948027629569, 'Usr_loc': 'The North', 'hashtags': []}
{'text': '@AlExtraBM @SasKwiin And to be able to demand equal access with reasonable price. Someone has to make sacrifice for… https://t.co/exBBxN7jTK', 'id': 1394327947889283074, 'Usr_loc': None, 'hashtags': []}
{'text': 'Ya boy looking good🥴. \n\nThank God  folded_hands  medium-dark_skin_tone for all the blessings I have received and will in the future. @ The Bahamas https://t.co/qhT2JJOd9k', 'id': 1394327947985752069, 'Usr_loc': 'Bahamas', 'hashtags': []}
{'text': "RT @HerGreySide: What would you have me confess my lover\nThat you don't already know\n\nWith my touch that I lovingly caress\nTo the eagerness…", 'id': 1394327948111474691, 'Usr_loc': 'ભારત', 'hashtags': []}
{'text': '@RupertVonRipp @CovfefeAnon @Ms_Calico93 @Evangelium18 @draig_pen @GreatIsGodsLove @ntontheterrible @Herr_Leverkuhn… https://t.co/aApPTqs9hR', 'id': 1394327948044480513, 'Usr_loc': None, 'hashtags': []}
{'text': '@Definews_Info @FinanceOms Another giving opportunity this projects a lot more great learning more deliverinng arti… https://t.co/LWSs1AX3Bx', 'id': 1394327948161818624, 'Usr_loc': None, 'hashtags': []}
{'text': "@simonhancock_uk @cb222016 @BBCNews The regulatory authority didn't test anything! \nAll they did was look at trial… https://t.co/Jn22yXPSDf", 'id': 1394327948023451653, 'Usr_loc': 'England', 'hashtags': []}
{'text': 'RT @PhillDKline: The Arizona Senate is demanding answers as should the American people.\xa0 As should all members of the media!!', 'id': 1394327948170248197, 'Usr_loc': 'Williamstown,New York, USA', 'hashtags': []}
{'text': 'RT @thegazangirl: Last night was brutal. Reports of over 60 bombs an hour all night long. Close to Al-Shifa hospital. They bombed my sister…', 'id': 1394327948208058378, 'Usr_loc': '+92', 'hashtags': []}
{'text': "RT @WonderfulSone: - IGAB is trending #8 worldwide\n- Girls' Generation are trending #1 on Melon\n- IGAB, I Got A Boy &amp; Girls Generation are…", 'id': 1394327948266676227, 'Usr_loc': '04L', 'hashtags': []}
{'text': 'RT @Farda_Alphonso: He got to do me first to show me he’s all business.', 'id': 1394327948212248580, 'Usr_loc': 'Dallas, TX', 'hashtags': []}
{'text': 'RT @venusiangeminii: Want to see me take them off?  sparkling_heart  Head over to my Only Fans for the all of the pics I took in (and out  winking_face ) of this beauti…', 'id': 1394327948237357060, 'Usr_loc': 'Join my adventure ✨👉🏻', 'hashtags': []}
{'text': '@SmithNelsonLa @ShannonFreshour @marceelias Yep, Dems should assume all of these laws will pass.  Resources should… https://t.co/Ln0IgiC2jV', 'id': 1394327948191309825, 'Usr_loc': None, 'hashtags': []}
{'text': "@daniel_miller31 @SoosLorene @tori_oestmann Its a FUNCTION from sex, not a consequence. If you're so concerned go a… https://t.co/WownrxBuJN", 'id': 1394327948157755393, 'Usr_loc': '29 ♋︎♏︎♐︎ she/they', 'hashtags': []}
{'text': 'RT @nikhilgupta_nkg: We all stand with you @DebMukh60943657', 'id': 1394327948371529729, 'Usr_loc': 'Gurgaon, India, Shimla HP', 'hashtags': []}
{'text': 'RT @lastnightsnora: I’m the friend you can cancel on, it’s definitely ok I won’t be mad at all', 'id': 1394327948518375424, 'Usr_loc': None, 'hashtags': []}
{'text': '@MyPalestine0 @Ahmadalshayip Not because it has al-Aqsa Mosque and the Church of the Holy Sepulchre, not because it… https://t.co/rS7g7WMwvx', 'id': 1394327948401029123, 'Usr_loc': None, 'hashtags': []}
{'text': 'RT @Nlechoppa1: Final Warning At 90 Right Now On Billboards. Stream All Day Everyday So We Can Peak At A New Spot  purple_heart  \nhttps://t.co/8wTKtwnXu9', 'id': 1394327948535160835, 'Usr_loc': None, 'hashtags': []}
{'text': "RT @hasson_ali1999: Journalists hate Ole because he's what they fear, a guy who can bring Utd back. If we start winning, what negative pres…", 'id': 1394327948484820992, 'Usr_loc': 'Cardiff, Wales, United Kindom', 'hashtags': []}
{'text': "RT @fionais__online: my account was suspended for this last week for saying b*rn all t*rfs\n\nand i can't believe i need to say this but #Fre…", 'id': 1394327948602355714, 'Usr_loc': 'yung titty', 'hashtags': []}
{'text': 'RT @whatdefook: I love you all with everything I am. Good night  wind_face  purple_heart  two_hearts \nOh and Bidan, take off your fooking mask. Nobody believes you anymore.…', 'id': 1394327948589780995, 'Usr_loc': 'Austin', 'hashtags': []}
{'text': 'RT @kokokbop: Y’ALL MOVE. MAIN CHARACTER ZHANG YIXING IS COMING!!! https://t.co/9ZuEyO2te3', 'id': 1394327948656742402, 'Usr_loc': None, 'hashtags': []}
{'text': 'RT @TashaMadisonxxx: TASHA here....Lethbridge Naughtiest Xxx massage mistress and content creator. My likes include getting naked and sucki…', 'id': 1394327948711272449, 'Usr_loc': 'Lethbridge, Alberta', 'hashtags': []}
{'text': 'RT @iamlaurenp: This has slain me all day. \n\nDogs are just the best. https://t.co/Tx3PgnqvaH', 'id': 1394327948728098818, 'Usr_loc': 'Georgia, USA', 'hashtags': []}
{'text': "RT @falloutboy: let's goooo… 2021 US @HellaMegaTour is happening this summer with @GreenDay + @Weezer  thumbs_up  thumbs_up ", 'id': 1394327948719759364, 'Usr_loc': 'Burbank ', 'hashtags': []}
{'text': 'RT @auaukhin: Protesters got abducted as terrorists violently cracked down the protest crowd with vehicles and gunfires.\n\n#ReleaseTheDetain…', 'id': 1394327948761522177, 'Usr_loc': None, 'hashtags': []}
{'text': 'RT @bakchodiaurkya: All I want to do is dance to Tum Se Hi with the loml https://t.co/swBPwX327S', 'id': 1394327948895866881, 'Usr_loc': None, 'hashtags': []}
{'text': 'Send Kanye and/or Elon, just so they know what they’re dealing with.', 'id': 1394327948833038344, 'Usr_loc': None, 'hashtags': []}
{'text': 'RT @dorisolaitan_: A relationship where y\'all "fix it" together with respectable communication&gt;&gt;&gt;', 'id': 1394327951542390787, 'Usr_loc': 'Dm for ads and promo ', 'hashtags': []}
{'text': '@Robert2k4 @TNBNaDeXe In this game, you can experience the excitement of Resident Evil. https://t.co/fDGOh2fjdu', 'id': 1394327951261552641, 'Usr_loc': None, 'hashtags': []}
{'text': '@issawomanista Which generation  face_with_tears_of_joy  maternal ancestors all Mississippi after reconstruction person_shrugging  medium_skin_tone \u200d female_sign ️ MO, AK, TN, MS. It’s a mess', 'id': 1394327951462764550, 'Usr_loc': 'St Louis, MO', 'hashtags': []}
{'text': 'What I always overshare my mf feelings', 'id': 1394327951563534337, 'Usr_loc': 'Yo daddys house', 'hashtags': []}
{'text': 'RT @tomgara: Extraordinary photo from Gaza on the front page of The Guardian today - six year old Suzy Eshkuntana pulled alive from the rub…', 'id': 1394327951550803968, 'Usr_loc': 'Malaysia', 'hashtags': []}
{'text': 'RT @joonmics: these are the records that dynamite mv teaser’s have. we should break all of these, and please share the teaser links to your…', 'id': 1394327951605342214, 'Usr_loc': None, 'hashtags': []}
{'text': 'RT @notsoaidil: today is the international day against homophobia, transphobia &amp; biphobia.\n\nto LGBTQ malaysians, there is love, solace &amp; co…', 'id': 1394327951735345153, 'Usr_loc': 'Penampang, Sabah', 'hashtags': []}
{'text': 'RT @Jacob_Sexton_: After 16 long months of not being able to be on a college campus with the coaches....\n\n it all changes on June 4th, 5th…', 'id': 1394327951773245448, 'Usr_loc': None, 'hashtags': []}
{'text': 'At this point, we are all working for Jeff Bezos. \n\n https://t.co/C1PBDNSZlP', 'id': 1394327951689195523, 'Usr_loc': 'USA', 'hashtags': []}
{'text': "RT @alientyong: happy one year anniversary to taeyong's drunk bubble messages  loudly_crying_face ", 'id': 1394327951554998278, 'Usr_loc': "i'm here if you need me ", 'hashtags': []}
{'text': '@armouredescort \nYOU MADE MY WHOLE MORNING, I literally howled with laughter!! https://t.co/wunaVjDuXH', 'id': 1394327951076990976, 'Usr_loc': 'Canada and USA', 'hashtags': []}
{'text': "@BrianKirschner_ I personally believe the ARG complexes are similar to The Masters which we all know he's has a lot… https://t.co/oz0o5Fs7Ka", 'id': 1394327951680933891, 'Usr_loc': 'Louisville, KY', 'hashtags': []}
{'text': 'This bitch called me ugly, I said bitch where? She said under all that makeup. I said... bitch where?', 'id': 1394327951798382597, 'Usr_loc': 'Wonderland ', 'hashtags': []}
{'text': '@shiniest_wheels @fuckthedrama Ill tell for the both of you sorry to interrupt but it was all over my tl broken_heart ', 'id': 1394327951743795200, 'Usr_loc': None, 'hashtags': []}
{'text': 'done dming all buyers for Jay Set Bulk and items from Mercari regarding 2nd payment if I accidentally left you out… https://t.co/HbfQ0HXCR4', 'id': 1394327951869550594, 'Usr_loc': 'Masterlist 👇🏻', 'hashtags': []}
{'text': 'y\'all go off about things being "problematic" while at the same time being problematic by pushing stereotypes to ju… https://t.co/8zkvQUf2Xa', 'id': 1394327951857135619, 'Usr_loc': 'Newgrounds', 'hashtags': []}
{'text': '@Johhnycomlighty No opening borders to all and sundry has caused cultural divides you have to adhere to Culture of… https://t.co/x35Qxuyudh', 'id': 1394327951920009222, 'Usr_loc': None, 'hashtags': []}
{'text': 'RT @433: I could watch an @ErlingHaaland interview all day, every day  rolling_on_the_floor_laughing  microphone  \n\n movie_camera  @DFBPokal_EN https://t.co/HBpSOOadte', 'id': 1394327951974486024, 'Usr_loc': 'STAY SAFE 💖', 'hashtags': []}
{'text': '@Klaa2BaradaNik2 @durko92 @LDOG186 @Fegz23 @JillSut94747796 @corner_martyn @crainzo Fans will sing what fans will s… https://t.co/K285pdt0aZ', 'id': 1394327951852937218, 'Usr_loc': None, 'hashtags': []}
{'text': 'RT @sluttystoner26:  police_car_light  ENGAGEMENT GROUP OPENINGS  police_car_light \n\n sparkling_heart  Evie’s Roses ~ no follow limit, Rt&amp;Like, 12hrcu, all welcome\n\n purple_heart  Evie’s Roses 2.0 ~ no…', 'id': 1394327952024801280, 'Usr_loc': None, 'hashtags': []}
{'text': "@KeepUpWithKFabe Not a name or a face to attribute to that quote and yet y'all still hot about that huh?", 'id': 1394327951974490117, 'Usr_loc': 'Southern United States', 'hashtags': []}
{'text': 'This Saturday night we live @ Hangars 3 sets!!! Geminis it’s y’all turn to act up! https://t.co/zkKz62FeJw', 'id': 1394327951429222402, 'Usr_loc': 'Washington, DC', 'hashtags': []}
{'text': 'The @Ligue1UberEats in favor of the fight against discrimination based on sexual orientation and gender identity.… https://t.co/NXv89Vc22x', 'id': 1394327951173378048, 'Usr_loc': None, 'hashtags': []}
{'text': 'RT @misanthropicc92: Someone once said Twitter is the sociology seminar where no one has done the reading but everyone is speaking. I think…', 'id': 1394327951995375616, 'Usr_loc': 'Vancouver, British Columbia', 'hashtags': []}
{'text': 'RT @The_Barftender: Every man or woman has their breaking point.\n\nKwame Brown been a punch line for jokes for 20 years. Y’all better leave…', 'id': 1394327952196874242, 'Usr_loc': 'Bronx, NY', 'hashtags': []}
{'text': 'RT @DAOGMGAWDDESS: Healthy love is always conditional.', 'id': 1394327952024870912, 'Usr_loc': 'earth ', 'hashtags': []}
{'text': 'RT @newrepublic: With unified control of Washington, Democrats should take the opportunity to get rid of the debt ceiling once and for all,…', 'id': 1394327952175861761, 'Usr_loc': 'Cologne, Germany', 'hashtags': []}
{'text': 'RT @MsRoyalY: Y’all Grey still saying thank you and he be eating good af https://t.co/CBhJ2omDfF', 'id': 1394327952037318658, 'Usr_loc': None, 'hashtags': []}
{'text': 'RT @SAbdeshahian: y’all think palestine is complicated but know everything about the marvel cinematic universe  loudly_crying_face  loudly_crying_face  loudly_crying_face ', 'id': 1394327952268042244, 'Usr_loc': None, 'hashtags': []}
{'text': 'RT @mikepompeo: The CCP and some liberals in Congress like @BernieSanders, @AOC &amp; @IlhanMN are siding with Hamas terrorists and against Ame…', 'id': 1394327952280625158, 'Usr_loc': None, 'hashtags': []}
{'text': 'RT @neon_red_glow: isr*el is the most antisemitic government of all time. PERIOD!!\nMurdering people, attacking them while they pray, kickin…', 'id': 1394327952347832322, 'Usr_loc': 'Wonderland', 'hashtags': []}
{'text': 'RT @musasohail007: All the people that went out and protested for Palestine &gt;&gt;&gt;&gt;&gt;&gt;&gt;&gt;', 'id': 1394327952251396099, 'Usr_loc': 'Lahore, Pakistan', 'hashtags': []}
{'text': 'ok gn ur all so pretty  loudly_crying_face  sparkles ', 'id': 1394327952255438850, 'Usr_loc': "ʲᵘⁿᵍ ʷʰᵉᵉⁱⁿ'ˢ ᵈⁱᵐᵖˡᵉ ", 'hashtags': []}
{'text': 'RT @coffeespoonie: This includes my service dog. Don’t touch my service dog.', 'id': 1394327952012234756, 'Usr_loc': '19 • she/her ', 'hashtags': []}
{'text': 'RT @HussamA: Heartbreaking! The best friend of my son-in-law just learned that 21 members of his family were all killed last night in Gaza.…', 'id': 1394327952326754307, 'Usr_loc': None, 'hashtags': []}
{'text': 'We are all loadshedded nare  thinking_face ', 'id': 1394327952469499908, 'Usr_loc': 'West Rand, South Africa', 'hashtags': []}
{'text': 'I just realized why they call it "the mall". We want to go to the all the stores - "Them all". The Mall - just move the M. lol!', 'id': 1394327952477859841, 'Usr_loc': 'United States', 'hashtags': []}
{'text': 'RT @atlantis_reed: Great concept, great themes, great setting, 10s all around', 'id': 1394327952381423618, 'Usr_loc': None, 'hashtags': []}
{'text': "There's people who didn't know anne marrie before this? Are y'all living in a cave???", 'id': 1394327952490442754, 'Usr_loc': 'buzzing larrie ', 'hashtags': []}
{'text': 'Armed mufti were seen inspecting all the bypassing vehicles near Ubwar overpass bridge Mandalay.… https://t.co/dF5tQhxsmF', 'id': 1394327952343453698, 'Usr_loc': 'Singapore', 'hashtags': []}
{'text': 'and then I really need to hang out in VRChat more because all my social skills are broken', 'id': 1394327952725200901, 'Usr_loc': None, 'hashtags': []}
{'text': 'RT @thegazangirl: Last night was brutal. Reports of over 60 bombs an hour all night long. Close to Al-Shifa hospital. They bombed my sister…', 'id': 1394327952708407297, 'Usr_loc': 'Pitcairn Island', 'hashtags': []}
{'text': 'RT @9sesinna: Salam guys,\n\nAmidst the devastating genocide that is occurring in Palestine, I have decided to start a fundraiser in order to…', 'id': 1394327952654020611, 'Usr_loc': 'they + others (NO he/him)', 'hashtags': []}
{'text': '@bonchieredstate Would you rather have someone silent or someone like AOC talking? People have nothing better to do… https://t.co/8cxHkwgG3F', 'id': 1394327952704393219, 'Usr_loc': 'Austin, TX', 'hashtags': []}
{'text': 'This is it', 'id': 1394327955715801092, 'Usr_loc': None, 'hashtags': []}
{'text': 'RT @TheNapMinistry: One of the millions of reasons you exhausted: you on social media inserting and being “witty” all day. A nap is waiting…', 'id': 1394327955795501066, 'Usr_loc': None, 'hashtags': []}
{'text': 'In Taunggyi, Shan State, junta thugs inspect all the bypassing vehicles in front of Hnin Lwin Lwin Photography shop… https://t.co/quYFxfM6lp', 'id': 1394327955787104257, 'Usr_loc': None, 'hashtags': []}
{'text': "Publishing new content isn't all you need.\n\nRather, you should focus on auditing and updating your existing content… https://t.co/nKb160vD0x", 'id': 1394327955996807172, 'Usr_loc': None, 'hashtags': []}
{'text': 'y’all awake? 🧐', 'id': 1394327956114198531, 'Usr_loc': 'i own a taser, back off', 'hashtags': []}
{'text': 'RT @Andiecip: @scentlodge Thank you everyone for all the congrats. I’m thrilled to have won. My son right away has started using the EROS f…', 'id': 1394327956051439620, 'Usr_loc': 'Canada ', 'hashtags': []}
{'text': "RT @SHINE_4EVER_: Nooo I told y'all he baby  loudly_crying_face ", 'id': 1394327955980001284, 'Usr_loc': 'Australia', 'hashtags': []}
{'text': 'RT @stargal46: @kk131066 @CassOMalley1 @oceanerazzurro @TheElfCall @Swiftyme123 @aliasann @emptynstr101 @Wipapa5 @CindyCinnis @PatsLadi99 F…', 'id': 1394327956072370184, 'Usr_loc': 'McKinney, TX 75070', 'hashtags': []}
{'text': 'Each of us have different problems in our life. But not all of us kaya nato eh handle. The best thing to do is pray always. folded_hands ', 'id': 1394327956189679617, 'Usr_loc': None, 'hashtags': []}
{'text': 'RT @nxiima: Dubai is cancelled. This city lights up the burj al Khalifa for anything... it makes sense now why they haven’t done so yet.', 'id': 1394327956017717248, 'Usr_loc': 'L-1485 ', 'hashtags': []}
{'text': 'MY DEAR LIVE I LOVE YOU WITH ALL MY HEART AND ID DO ANYTHING JUST TO HUG YOU OMG I LIVE YOU MY DEAR AANG https://t.co/q33fL6jaS8', 'id': 1394327955942248455, 'Usr_loc': ' she/her ', 'hashtags': []}
{'text': '@Swingingaxxx @_5S2S_ All of this.', 'id': 1394327956340842501, 'Usr_loc': 'Dirty South', 'hashtags': []}
{'text': 'RT @North_Star88: Ashraf Ghani seem to be a huge spoiler for peace process after US has decided to leave.\n\nAs I said many times, he will be…', 'id': 1394327956508532746, 'Usr_loc': None, 'hashtags': []}
{'text': 'RT @cryptopolica: $75 Giveaway! • Ends in 72 hours\n\nJust:\n1. Follow me &amp; @DogeSquadBSC\n2. Join their Telegram Group\n3. Retweet &amp; reply proo…', 'id': 1394327956412014594, 'Usr_loc': None, 'hashtags': []}
{'text': 'RT @anything4views: Influencers making and selling crypto currencies should all be beaten and skinned.\n\nLiteral fucking scumbags.', 'id': 1394327956516917255, 'Usr_loc': 'Illinois, USA', 'hashtags': []}
{'text': 'RT @lynnmur56635202: THIS particular travesty will rightly go down in history as the worst and one of the most harmful public policy in his…', 'id': 1394327956487553026, 'Usr_loc': None, 'hashtags': []}
{'text': 'RT @MichaelTanuvasa: The Palestinians dying dgaf that we “only have a 2 party system”. They are blaming ALL of Israel and ALL of America ri…', 'id': 1394327956583968771, 'Usr_loc': 'Portland, OR', 'hashtags': []}
{'text': 'RT @amazonnews: “Today, we want to recognize International Day Against Homophobia, Transphobia, and Biphobia. Amazon has a longstanding com…', 'id': 1394327956571361280, 'Usr_loc': 'Switzerland', 'hashtags': []}
{'text': 'Our very simple yet effective maths challenge this week- all driven by assessment and interest. They also love the… https://t.co/FtTm6E7K2C', 'id': 1394327956256956420, 'Usr_loc': 'Staffordshire', 'hashtags': []}
{'text': 'RT @tomgara: Extraordinary photo from Gaza on the front page of The Guardian today - six year old Suzy Eshkuntana pulled alive from the rub…', 'id': 1394327956697206786, 'Usr_loc': None, 'hashtags': []}
{'text': '@jjufuk  all in', 'id': 1394327956625965064, 'Usr_loc': 'İstanbul, Türkiye', 'hashtags': []}
{'text': "RT @pledis_17: [17'S] We sat down for another whimderful conversation with @wmag for the Music Issue upside-down_face \nRead all about it here!\nhttps://t.co/…", 'id': 1394327956760141831, 'Usr_loc': None, 'hashtags': []}
{'text': 'Hertha Berlin may sell Matheus Cunha for a fee of around €30 million - Leeds United, AS Monaco, Napoli &amp; Atalanta a… https://t.co/ADVzBy1ve3', 'id': 1394327956647030792, 'Usr_loc': 'team@getgermanfootballnews.com', 'hashtags': []}
{'text': 'RT @KSSandi24: In Taunggyi, Shan State, junta thugs inspect all the bypassing vehicles in front of Hnin Lwin Lwin Photography shop. #WhatsH…', 'id': 1394327956852396032, 'Usr_loc': 'United States', 'hashtags': []}
{'text': '@tryglass Just like anything out there though, good things come to those who wait, and with the development team ha… https://t.co/32YDoIv9CV', 'id': 1394327956701466629, 'Usr_loc': None, 'hashtags': []}
{'text': 'RT @Forever9PH:  folded_hands  please help us RT\n\nNCT - HOT SAUCE PH GO\n\n double_exclamation_mark ️ 490.00 only  double_exclamation_mark ️\n round_pushpin SEALED complete except poster/pob\n round_pushpin  photocard pooling availa…', 'id': 1394327956885966852, 'Usr_loc': 'Seoul, Republic of Korea', 'hashtags': []}
{'text': 'RT @vinod_d007: Credit to @adilray, @GMB &amp; @susannareid100 for this! We could do with more govt scrutiny on the national tele, despite how…', 'id': 1394327956835770369, 'Usr_loc': 'UK', 'hashtags': []}
{'text': 'Silently sitting at my desk when all of a sudden “Bing Bang Bong” starts to creep back into my head. https://t.co/gLsBmixc1b', 'id': 1394327955770335244, 'Usr_loc': 'Canada', 'hashtags': []}
{'text': "I will leave my heart at the door\nI won't say a word\nThey've all been said before, you know\nSo why don't we just pl… https://t.co/2yCSXPS9VL", 'id': 1394327956508585984, 'Usr_loc': None, 'hashtags': []}
{'text': 'RT @Sassychickie: Ha yep!! And people bitched at me for staying, yet here they all are.  rolling_on_the_floor_laughing ', 'id': 1394327956911271936, 'Usr_loc': None, 'hashtags': []}
{'text': 'RT @FruitilyArt:  sparkles  COMMISSIONS OPEN  sparkles \nHello people. I opened commissions. Paypal (EUR &amp; USD) and Ko-fi (USD) only.\nI’m too sad to make an a…', 'id': 1394327957024481281, 'Usr_loc': 'Dunaújváros, Magyarország', 'hashtags': []}
{'text': "RT @BlackdogeBSC: What's good y'all? Blackdoge is all about the COMMUNITY, that's why we're announcing the Blackdoge 'Giveaway Contest' wor…", 'id': 1394327957003407364, 'Usr_loc': 'Eastern Visayas, Republic of t', 'hashtags': []}
{'text': 'RT @ani_trevino23: Bitch  face_with_tears_of_joy  face_with_tears_of_joy ', 'id': 1394327956965797889, 'Usr_loc': 'Texas ', 'hashtags': []}
{'text': "@POTUS\n@DeptofDefense\nDid I become all you thought Hatchet Girl could be? One problem, I'm left handed...  \n\nHere’s… https://t.co/zw1cel8DZG", 'id': 1394327957016023041, 'Usr_loc': None, 'hashtags': []}
{'text': "RT @LORDOFSUCC1: @Angery_Neeson52 @HeavenlyControl 10/10 meme, literally all Invincible memes that I've seen are 10/10 quality. And never g…", 'id': 1394327957284532230, 'Usr_loc': 'Where the money reside. ', 'hashtags': []}
{'text': '@docrussjackson hes probably part of that Orwellian and draconian force, but like in an “oh look, theres a good one… https://t.co/hYhNPCBYpc', 'id': 1394327957263560708, 'Usr_loc': 'London, England', 'hashtags': []}
{'text': '@theAleppoCatman Alina‘s eyes tell it all...“You touch my baby, you‘re gonna be in big trouble!“  smiling_cat_face_with_heart-eyes ', 'id': 1394327957536182275, 'Usr_loc': None, 'hashtags': []}
{'text': '@LiverpoolGuild reopen their indoor student venue, Mountford Hall, today - goodbye to beers in the rain!  cloud_with_rain ️', 'id': 1394327957691326472, 'Usr_loc': 'London, England', 'hashtags': []}
{'text': '@iLoveLuffy123 Man i been looking for this gif for the longest time u mean to tell me all i had to do was type itac… https://t.co/Du7KBDcmTl', 'id': 1394327956764364806, 'Usr_loc': 'she they blk ', 'hashtags': []}
{'text': 'RT @IlhanMN: What this child and other Palestinians lare subjected to isn’t fair.\n\nThe cruelty of US policy that refuses to see her as wort…', 'id': 1394327957682937858, 'Usr_loc': 'USA', 'hashtags': []}
{'text': 'RT @nikissama: who made ni-ki this happy, who made him laugh like this...? y’all, the genuine happiness  frowning_face ️ frowning_face ️ frowning_face ️ frowning_face ️ frowning_face ️ https://t.co/ybXmN8IWfJ', 'id': 1394327957766762496, 'Usr_loc': 'ₑₙ₋', 'hashtags': []}
{'text': "RT @exo_statistics: 'DON'T FIGHT THE FEELING (Expansion Ver.)' debuts at #1 on Ktown4u Daily Chart (5/17/21) with 20,105 copies sold!  fire \n\n—…", 'id': 1394327957804486658, 'Usr_loc': None, 'hashtags': []}
{'text': 'RT @neezzah: Drop handles and follow all likes  french_fries ,   kiss_mark ', 'id': 1394327957804572688, 'Usr_loc': 'Abuja, Nigeria', 'hashtags': []}
{'text': 'RT @WayneDupreeShow: "Patriot drives to a gas station, gets out of his car and demands to know where all the "Biden supporters" are -- what…', 'id': 1394327959935229952, 'Usr_loc': 'USA', 'hashtags': []}
{'text': 'RT @MsRoyalY: Y’all Grey still saying thank you and he be eating good af https://t.co/CBhJ2omDfF', 'id': 1394327959926939648, 'Usr_loc': None, 'hashtags': []}
{'text': "@newsmax That's about all AOC is good for....throwing someone out of a bar...", 'id': 1394327959918555140, 'Usr_loc': 'Maiden, NC', 'hashtags': []}
{'text': "RT @priyankashrim20: It's all planning against Sant Shri Asharamji Bapu ,He is innocent,we request to government please give them bail\nJust…", 'id': 1394327959809396741, 'Usr_loc': None, 'hashtags': []}
{'text': 'Couldn’t imagine graduating high school during covid and getting to celebrate by having cars randomly beep at the s… https://t.co/CSvSrSV7BV', 'id': 1394327960002367488, 'Usr_loc': 'Pittsburgh', 'hashtags': []}
{'text': '@codespace Yeah like I said if someone is a legit POS then by all means. Just tired of the fling shit at the wall a… https://t.co/sctii8rQ8p', 'id': 1394327959952052232, 'Usr_loc': 'Hell', 'hashtags': []}
{'text': 'RT @gavi: We are thrilled that @Glblctzn’s fundraising initiative led by Prince Harry and Meghan, The Duke and Duchess of Sussex in partner…', 'id': 1394327960128266245, 'Usr_loc': None, 'hashtags': []}
{'text': 'RT @ScottZILWarrior: I will send one random person $1000 in 72hrs all you have to do is RT and be following myself @JackHODLr &amp; @WolfyStree…', 'id': 1394327960283320320, 'Usr_loc': None, 'hashtags': []}
{'text': 'RT @Singloom: The worst thing to come out of all these “problematic art/shippers” call outs is that serious terms have been watered down so…', 'id': 1394327960342171648, 'Usr_loc': 'I needed that', 'hashtags': []}
{'text': 'RT @wildriftPHL: Rengar and Kha’Zix have decided to finally settle the score… through a game of hide-and-seek on the Rift. Can you spot the…', 'id': 1394327960400789504, 'Usr_loc': None, 'hashtags': []}
{'text': "RT @marsipan_art: My tl is full of Seungmin pics and it's all I needed to feel less stressed today, no joke  loudly_crying_face ", 'id': 1394327960430202887, 'Usr_loc': None, 'hashtags': []}
{'text': 'Uhhhhh yeahhh no, not at all', 'id': 1394327960329629700, 'Usr_loc': 'Philadelphia, PA', 'hashtags': []}
{'text': '@ImSpeaking13 I have been trying to do that all my life.. face_with_rolling_eyes ', 'id': 1394327960468004875, 'Usr_loc': 'USA ', 'hashtags': []}
{'text': 'RT @mpp_gtto: @ExcludedUnity Thank you! any and all support welcomed. Please help spread the word that there is a protest on 15th July on t…', 'id': 1394327960400846850, 'Usr_loc': 'Northumberland UK', 'hashtags': []}
{'text': "RT @TheJadeAmora: It's all fun &amp; games until I wanna play too  smiling_face_with_horns  face_blowing_a_kiss  https://t.co/9kXP4jsOcc", 'id': 1394327960446935041, 'Usr_loc': '♡⃛', 'hashtags': []}
{'text': '@zedsdead feels hella good to see y’all come back with the crew :)', 'id': 1394327960447066112, 'Usr_loc': 'HTX🛸FL', 'hashtags': []}
{'text': '@SonuSood @tushti_india @DTDCIndia @SoodFoundation *Help me and my mom to fight covid*\n\nHi all.. this is Sateesh Bu… https://t.co/idOsaK9gtz', 'id': 1394327960451096577, 'Usr_loc': 'Hyderabad, India', 'hashtags': []}
{'text': '@_lawonder @SergioA60798547 @RosaNegra_08 @SolyMar66091744 @AlitaWarsAngel @THEWORDINCHRIST @KiraXiona @BernadhetL… https://t.co/1kwbTSJeGJ', 'id': 1394327959696289792, 'Usr_loc': 'Córdoba, Argentina🇦🇷🇬🇪', 'hashtags': []}
{'text': 'RT @SCryptoschool:  herb  @relitefinance \n\n herb  Cross-chain lending protocol enabling users to lend and borrow all crypto assets in one place. They…', 'id': 1394327960493035520, 'Usr_loc': None, 'hashtags': []}
{'text': '@kitarawest I want to invite you to play this super relaxing and exciting  game with me. https://t.co/DPFCdbSbOR', 'id': 1394327960589582338, 'Usr_loc': None, 'hashtags': []}
{'text': 'RT @stfuvienbbn: literally all the time https://t.co/CpeenZ6bkz', 'id': 1394327960748969985, 'Usr_loc': 'Miami, FL', 'hashtags': []}
{'text': 'Need to fix all my cars &amp; stop bullshiting', 'id': 1394327960879046657, 'Usr_loc': None, 'hashtags': []}
{'text': 'RT @Farda_Alphonso: He got to do me first to show me he’s all business.', 'id': 1394327960681857025, 'Usr_loc': 'Lonehill. South Africa', 'hashtags': []}
{'text': 'Goodnight to all 4036 followers of MagnificoMendy I hope you have some irreplaceable dreams tonite x', 'id': 1394327961013145600, 'Usr_loc': None, 'hashtags': []}
{'text': 'RT @rebelleflowerr_: I can’t wait to be married &amp; be ducked off with my husband &amp; never talk to y’all ever again', 'id': 1394327960883183622, 'Usr_loc': '423 ✈️ 404 ', 'hashtags': []}
{'text': 'RT @riicemochii: so you know how in the village puppet commercial, donna was controlling angie? what if.. they were all controlling their o…', 'id': 1394327960971366404, 'Usr_loc': 'Salt Mines', 'hashtags': []}
{'text': "RT @futureofrep: YOU SEE ME IN HINDSIGHT TANGLED UP WITH YOU ALL NIGHT BURNING IT DOWN SOMEDAY WHEN YOU LEAVE I'LL BET THESE MEMORIES FOLLO…", 'id': 1394327961080369161, 'Usr_loc': 'on a bench in coney island', 'hashtags': []}
{'text': "Yes. Mikes and Michaela's across Scotland should get their own free houses. We are hoping to commit 150,000 new hom… https://t.co/fIwM8ylOg3", 'id': 1394327960929415172, 'Usr_loc': None, 'hashtags': []}
{'text': 'RT @LIKELAMAR: When she ain’t been texting me back all day but posting stories on some niggas boat https://t.co/Y7UZnIs2ro', 'id': 1394327961151492096, 'Usr_loc': 'Los Angeles, CA', 'hashtags': []}
{'text': "RT @steveogollaw: No let's agree: just because you're a politician or an enthusiastic sycophantic supporter of one, does not give you the r…", 'id': 1394327961147482115, 'Usr_loc': 'Nairobi, Kenya', 'hashtags': []}
{'text': 'All the time.', 'id': 1394327961231249408, 'Usr_loc': 'Arizona State University✨', 'hashtags': []}
{'text': 'Ind stand with Israel is the most shocking thing I saw today pensive_face \nLike seriously forget everything\nThose grown men stra… https://t.co/MZ9NzKfY6k', 'id': 1394327961197682694, 'Usr_loc': None, 'hashtags': []}
{'text': 'So last year we all got to live through a real-life version of Outbreak. This year is it going to be a real life ve… https://t.co/wBRYWgeO6Y', 'id': 1394327961042661385, 'Usr_loc': 'Washington, DC', 'hashtags': []}
{'text': 'RT @H0EFORJHOPE: can we all agree that... https://t.co/DoNIWOLToO', 'id': 1394327961201897472, 'Usr_loc': 'India', 'hashtags': []}
{'text': 'why are all these companies doing lgbt+ marketing', 'id': 1394327961415786497, 'Usr_loc': 'fart apologist ! chat_ ', 'hashtags': []}
{'text': 'RT @Gus47485460: @redsteeze I would say they dont respect us. Like we are subordinate to them and we look to them for all answers and belie…', 'id': 1394327961315201030, 'Usr_loc': 'London', 'hashtags': []}
{'text': 'RT @bugsbunny2062: I axed all Coke products from my house! Have you??? https://t.co/bReTcWu1I8', 'id': 1394327961269112838, 'Usr_loc': 'Canada', 'hashtags': []}
{'text': 'Think about how incredible / awkward the first wedding dance floor will be once all this is done \n\nWe have lost 2 s… https://t.co/KdzzHyMy1z', 'id': 1394327961344659456, 'Usr_loc': 'Halifax, Nova Scotia', 'hashtags': []}
{'text': 'so first of all ive been thinking about the missing things in the lore lately, the missing wither skulls, in tommys… https://t.co/3AaKlPDIqq', 'id': 1394327963894796292, 'Usr_loc': 'they / he / she ', 'hashtags': []}
{'text': 'RT @hrjlover: renjun wanted to run away cuz the place they landed at had too many people but haechan said not to bc "u have me" and they al…', 'id': 1394327964142161932, 'Usr_loc': 'Dubai, United Arab Emirates', 'hashtags': []}
{'text': '@KhanhPhan6 @RyanFeePoker All the more reason I’d like to hear his takes now with ETH/DeFi leading this second big bull run in crypto.', 'id': 1394327964096122888, 'Usr_loc': 'RoundingAgain.com', 'hashtags': []}
{'text': 'RT @LittleBreeder: His superior seed is all I can think about while daddy is at work. I want my next baby so bad.  spade_suit ️  https://t.co/50NFmQh7…', 'id': 1394327964150636551, 'Usr_loc': 'Ohio, USA', 'hashtags': []}
{'text': '@wintercafes good night bestie! we all did so well today so sleep well! take a lil rest from time to time once you… https://t.co/8MMaerazak', 'id': 1394327964192448515, 'Usr_loc': None, 'hashtags': []}
{'text': "tell me you don't wanna put your dick in between my thighs and cum all over my stockings, go on~ https://t.co/LRK4X4sYow", 'id': 1394327963861098497, 'Usr_loc': None, 'hashtags': []}
{'text': 'RT @Farda_Alphonso: He got to do me first to show me he’s all business.', 'id': 1394327964263796737, 'Usr_loc': None, 'hashtags': []}
{'text': "RT @AEGRO_84: Having played (and finished) Days Gone, there's no way the game is a 63.\n\nUnless the game is riddled with bugs again, it dese…", 'id': 1394327964289011713, 'Usr_loc': 'Look behind you, Xbot.', 'hashtags': []}
{'text': "ㅤㅤ\n\nㅤㅤㅤㅤ❛❛\xa0Then. . . You can consider me a friend! I am happy to hear that you aren't going to judge me so much! ❜❜… https://t.co/PqPAVXDBMA", 'id': 1394327964129583110, 'Usr_loc': 'ᅠ   ᅠ                ', 'hashtags': []}
{'text': "Coming to terms with this (and other painful truths/trauma) isn't easy. I wouldn't be surprised if i 'forget'/repre… https://t.co/UK1Xgj5gfR", 'id': 1394327963890561030, 'Usr_loc': 'Penkridge, Staffordshire, UK', 'hashtags': []}
{'text': 'RT @MsRoyalY: Y’all Grey still saying thank you and he be eating good af https://t.co/CBhJ2omDfF', 'id': 1394327964318306305, 'Usr_loc': None, 'hashtags': []}
{'text': 'RT @stressPGR: I will be attending the first tea and biscuit session and will be ready to answer any questions regarding my poster. Also ha…', 'id': 1394327964339343361, 'Usr_loc': 'Lichfield, England', 'hashtags': []}
{'text': "@defencelesslena I'M SO CLOSE TO CRYING AND IM NOT KIDDING AT ALL, THATS HOW MUCH COMFORT ITS GIVING ME", 'id': 1394327964444073985, 'Usr_loc': "louis' ocean eyes", 'hashtags': []}
{'text': 'RT @tomgara: Extraordinary photo from Gaza on the front page of The Guardian today - six year old Suzy Eshkuntana pulled alive from the rub…', 'id': 1394327964465078273, 'Usr_loc': 'India', 'hashtags': []}
{'text': 'RT @FMOptimist: eyyyy first 1:4x in atp all dlc https://t.co/UVoIt7xF95', 'id': 1394327964527960069, 'Usr_loc': 'Australia', 'hashtags': []}
{'text': 'Bruh this shit happens all the time. Pull into the neighborhood and go to cut the music down that isn’t even playin… https://t.co/zgiWQ3mFUs', 'id': 1394327964356055042, 'Usr_loc': 'Wilmington, NC', 'hashtags': []}
{'text': "@PopCrave @justinbieber Black is beautiful black_heart Black Lives Matter raised_fist  medium-dark_skin_tone I can't stop,I won't stop speaking_head We are victims , My Son de… https://t.co/3XhKXTcVfH", 'id': 1394327964410646530, 'Usr_loc': 'United States', 'hashtags': []}
{'text': 'RT @dorisolaitan_: A relationship where y\'all "fix it" together with respectable communication&gt;&gt;&gt;', 'id': 1394327964645478407, 'Usr_loc': 'Hidden Leaf ', 'hashtags': []}
{'text': '🇵🇭PH Giveaway🇵🇭\n\n— MONSTA X THE:CODE UNSEALED ALBUM\n\nEnds: May 23', 'id': 1394327964582518784, 'Usr_loc': '🇵🇭', 'hashtags': []}
{'text': '@BrodyXmas @StreamersRT1 New channel, going live soon, give us a follow if would be so kind, we support all back  thumbs_up … https://t.co/GoWRpPaTXl', 'id': 1394327964641284099, 'Usr_loc': 'Scotland', 'hashtags': []}
{'text': "RT @postslore: @jenliet the media doesn't know BTS at all  loudly_crying_face ", 'id': 1394327964821635077, 'Usr_loc': 'TS · PM · OR', 'hashtags': []}
{'text': 'RT @BooNon_98: Twice : Taste of Love\nMonsta X : Flavors of Love\nSeventeen : Power of Love\n\nJune month is all about Love two_hearts  two_hearts  two_hearts  two_hearts !!!!', 'id': 1394327964838334464, 'Usr_loc': 'svt universe', 'hashtags': []}
{'text': 'RT @Markvsii: all this shitty symbol has taught me is to drink my own piss https://t.co/bHyqDNHFCz', 'id': 1394327964968316930, 'Usr_loc': 'ur mum', 'hashtags': []}
{'text': '@FoxNews Hey world, \nWill you continue to watch what happened on your seat?\nThis is not fair at all.\nPlease be with… https://t.co/FpyHisWyhe', 'id': 1394327965031411718, 'Usr_loc': None, 'hashtags': []}
{'text': '@IvanGould7 @Flaminhaystack I am so very sorry to learn what happened to Laura; thank you for all you are doing to… https://t.co/oIWkIQsONa', 'id': 1394327964976832512, 'Usr_loc': 'Beds, Luton, MK, The World', 'hashtags': []}
{'text': 'RT @toyamaid: not this loser .....', 'id': 1394327965001990150, 'Usr_loc': 'she/they', 'hashtags': []}
{'text': "@mxataz_ @PlayVALORANT Goddamn y'all are desperate huh. This has nothing to do with console. Just performance impro… https://t.co/JnA6Ydtkfn", 'id': 1394327965085831180, 'Usr_loc': 'Chennai, India', 'hashtags': []}
{'text': '@hemantmehta His is an old tiresome argument, “if you haven’t read all the exact same books I have (and agreed with… https://t.co/NcDPFCdTA4', 'id': 1394327965073354756, 'Usr_loc': 'boston', 'hashtags': []}
{'text': 'all I can say is that I’m absolutely in love with the concept of these photos', 'id': 1394327965404581888, 'Usr_loc': 'she | her ✧ 13', 'hashtags': []}
{'text': 'FYI: I never portrayed a basic boring sideline reporter image. I’ve always been snarky &amp; opinionated. My image wasn… https://t.co/07M12QJz7N', 'id': 1394327965492711425, 'Usr_loc': 'Houston / Philly', 'hashtags': []}
{'text': 'RT @KonttiTheCutie: Good morning everyone  growing_heart  cherry_blossom \nHope you all have a Wonderful day  red_heart ️ https://t.co/XE5sZ5UysJ', 'id': 1394327965542981636, 'Usr_loc': 'Fire', 'hashtags': []}
{'text': "@shizuka_says Yup and wake up All night it's fun.", 'id': 1394327965664747530, 'Usr_loc': None, 'hashtags': []}
{'text': 'RT @VladimirGlotin: Y’all President that y’all voted for gave Israel $735 million worth of arms against Palestine lol', 'id': 1394327965648007170, 'Usr_loc': '5th Dimension👤', 'hashtags': []}
{'text': "@dev04059 @RotoClegg Small sample. I wouldn't be worried at all yet", 'id': 1394327965572468738, 'Usr_loc': 'Maine, USA', 'hashtags': []}
{'text': 'RT @NuCampEconomics:  loudspeaker Call for Papers loudspeaker \n2nd NuCamp Virtual PhD Conference June 15-16 by @NuCampEconomics and @OxfordEconDept \n\nSubmit by May…', 'id': 1394327965681467392, 'Usr_loc': 'Federal Capital Territory, Nigeria', 'hashtags': []}
{'text': 'RT @jeffreyatucker: People always ask me "but what about India?" This one chart is worth more than all media reports. https://t.co/NxZEKWtA…', 'id': 1394327965484396544, 'Usr_loc': 'Make Kanada Free Again', 'hashtags': []}
{'text': '@AngelKostan \n@KaneKarlsonRP \n@SRollinsNC1 \n@LexiPoppetNC1 \nAn excellent SL has hit your TL written by four extraor… https://t.co/YPLQkMYwKA', 'id': 1394327965421420546, 'Usr_loc': 'United States', 'hashtags': []}
{'text': '@HEVnamedMeGRAP @MrChuckD @hiphopgods @WuTangClan Yessirrrr that bassline!! Thats my favorite hip hop beat of all times', 'id': 1394327965706637316, 'Usr_loc': 'Baltimore MD', 'hashtags': []}
{'text': 'Holland - 0-2\nUsman - 2-0\nWhittaker - 1-0\nIzzy - 0-1\nMax - 1-0', 'id': 1394327965639524354, 'Usr_loc': '🕳', 'hashtags': []}
{'text': 'Lair all of us knew that people in India were dying from this variant; they chose to keep India open because of the… https://t.co/W1jG3879B4', 'id': 1394327965656289281, 'Usr_loc': 'UK', 'hashtags': []}
{'text': 'y’all better unflop this kitchen_knife ', 'id': 1394327965828255746, 'Usr_loc': 'she/her desi', 'hashtags': []}
{'text': 'RT @hyunrachas: "skz music all sounds the same" their title tracks don\'t even sound the same  loudly_crying_face  please tell me how back door, which is edm w…', 'id': 1394327965853310976, 'Usr_loc': 'desi', 'hashtags': []}
{'text': 'RT @AkiddieNG: Our android and iOS apps are now in Beta. Sign up with the link below to try the app with your children/wards. \n\nYou stand a…', 'id': 1394327965857689604, 'Usr_loc': None, 'hashtags': []}
{'text': '@coochiebeggerf1 @HanaHoops All three of those games were without being fully healthy, now we got trip back', 'id': 1394327965912141833, 'Usr_loc': None, 'hashtags': []}
{'text': 'RT @ConfidenceDutta: A genuine smile is one of the world’s rarest treasures  butterfly  sparkles \n\nThis is why we’re here. All of us. To make the world smile…', 'id': 1394327968290275328, 'Usr_loc': None, 'hashtags': []}
{'text': 'RT @Farda_Alphonso: He got to do me first to show me he’s all business.', 'id': 1394327968172810247, 'Usr_loc': 'bn', 'hashtags': []}
{'text': 'RT @cryptopolica: $50 Giveaway! • Ends in 48 hours\n\nJust:\n1. Follow me &amp; @BurnTokenBSC \n2. Like and retweet this + their pinned post \n\nAll…', 'id': 1394327968273502210, 'Usr_loc': None, 'hashtags': []}
{'text': 'RT @_dnxw: i used to be the “chaser” in all of my friendships &amp; relationships.. literally begging for reciprocation and to be treated corre…', 'id': 1394327968382603265, 'Usr_loc': 'In Your Dreams ', 'hashtags': []}
{'text': "RT @irisstylosa: Ok all you World Leaders - you've called for the end to the violence on both sides - what next?\nBack to bed or another cup…", 'id': 1394327968374312961, 'Usr_loc': None, 'hashtags': []}
{'text': 'Congrats to @ParrishBeagle on winning Athlete of the Week!! Dude put up numbers all year on the bump and at the pla… https://t.co/UwkjJyndbr', 'id': 1394327968328073229, 'Usr_loc': 'Overland Park, KS', 'hashtags': []}
{'text': 'RT @SandraSentinel: Democrats: “I don’t always feel confident in my election results. But when I do, I call the National Guard, build a fen…', 'id': 1394327968487559175, 'Usr_loc': None, 'hashtags': []}
{'text': "RT @lolfarxh:  double_exclamation_mark ️FUNDRAISER double_exclamation_mark ️\n\nI know your tl's  are full of fundraisers and rightly so. Right now our Palestinian brothers and sisters need…", 'id': 1394327968537878528, 'Usr_loc': None, 'hashtags': []}
{'text': '@boredassBoreas No catch at all of course!', 'id': 1394327968558768134, 'Usr_loc': 'Same mun as: @HisDearWatson', 'hashtags': []}
{'text': 'RT @itsyayaduhhhh: The way the track team carries the school', 'id': 1394327968483319816, 'Usr_loc': 'Houston, TX ', 'hashtags': []}
{'text': '@BandwagonAsia @ericnamofficial @ArmaanMalik22 @KSHMRmusic All the best @arman \nAap ase hi tereki krte rho \nGod bless you', 'id': 1394327968646766594, 'Usr_loc': None, 'hashtags': []}
{'text': 'RT @nostr8answer: for sure this kind of stuff happens with or without malicious intent all the time, and it happens regardless of whether o…', 'id': 1394327968638513154, 'Usr_loc': 'Floatin around...', 'hashtags': []}
{'text': '@JMarple4 Women need to stop all unpaid labor, avoidable spending &amp; fraternizing with misogynists whenever &amp; wherev… https://t.co/jO7qJNHHj8', 'id': 1394327968562835456, 'Usr_loc': None, 'hashtags': []}
{'text': 'RT @Glampanties: Let sweet horny mom take care of all your needs!\n\nJoin me on OnlyFans for just $3 \n\nhttps://t.co/Y5iklv3w5w https://t.co/9…', 'id': 1394327968659484673, 'Usr_loc': None, 'hashtags': []}
{'text': 'RT @AlyssaMarie2x: Who’s face can I squirt all over weary_face  sweat_droplets  https://t.co/UrEWCWf0LR', 'id': 1394327968625922051, 'Usr_loc': None, 'hashtags': []}
{'text': '@GhidaHoumani @tomgara @rollsroyz She will survive just like all Palestinians survived because we are born to resist 🇵🇸', 'id': 1394327968797929483, 'Usr_loc': 'محافظة عمان, المملكة الأردنية ', 'hashtags': []}
{'text': 'RT @Rashmidvs: You can bully and harass us all you want, but we will not stop advocating and raising our voices against anti-hindu bigotry…', 'id': 1394327968751575040, 'Usr_loc': None, 'hashtags': []}
{'text': 'Texas can use some intelligence, honesty, and caring about its residents, so we are all for Mike Collier.', 'id': 1394327968592236548, 'Usr_loc': None, 'hashtags': []}
{'text': 'RT @ScottZILWarrior: I will send one random person $350 in 24hrs all you have to do is RT and be following myself and @FootballStarsIO\n\nAdd…', 'id': 1394327968915202053, 'Usr_loc': None, 'hashtags': []}
{'text': 'Canada definitely needs a Conservative news channel, that gets Nationwide coverage.\n\nIt’s unbelievable how this has… https://t.co/zEdfhaUkVx', 'id': 1394327968839704579, 'Usr_loc': 'Canada', 'hashtags': []}
{'text': '@papabless420420 Hey dude! I’m a writer for The Athletic, and I wanted to write something about all the people who… https://t.co/KV16WqQpOd', 'id': 1394327968864931840, 'Usr_loc': 'sgentille@theathletic.com', 'hashtags': []}
{'text': 'GOD  THAT  ONE  SCENE  IN SHERA  WHERE  GLIMMER  IS  TALKING  ABOUT  WHEN  SHE  FIRST  LEARNED  TO  TELEPORT  AND… https://t.co/Dqv9HSxFbM', 'id': 1394327969032810498, 'Usr_loc': 'Momento Mori ★', 'hashtags': []}
{'text': "RT @alientyong: happy one year anniversary to taeyong's drunk bubble messages  loudly_crying_face ", 'id': 1394327969032597505, 'Usr_loc': 'she/her, 22 ', 'hashtags': []}
{'text': '@David54417311 If you like shooting games, this one will definitely not let you down! https://t.co/heUbqZFGCg', 'id': 1394327969057976327, 'Usr_loc': None, 'hashtags': []}
{'text': 'RT @blessadj: Bro. After all these years I was just clicking for luck https://t.co/lBf0Y7dVHZ', 'id': 1394327969196298243, 'Usr_loc': 'south africa', 'hashtags': []}
{'text': "RT @falastineee48: don't you ever forget that palestinians have been screaming all of this for 73 years and the world chose to wait until n…", 'id': 1394327969167024128, 'Usr_loc': '#FreePalestine ', 'hashtags': []}
{'text': 'RT @Shuaibabba: All of a sudden you don’t have Ulcer anymore  clown_face ', 'id': 1394327969250881541, 'Usr_loc': 'Kaduna, Nigeria', 'hashtags': []}
{'text': 'RT @EllevateCHI: In a professional’s life, work can be an all-consuming priority. Because of that, health and wellness often take a back se…', 'id': 1394327969301151751, 'Usr_loc': 'New York City', 'hashtags': []}
{'text': 'RT @McClainJulie: We should all be alarmed. There are people dying for reproductive freedom in other countries. It may not look the same he…', 'id': 1394327969225744386, 'Usr_loc': None, 'hashtags': []}
{'text': '@DKThomp The elderly were more likely to mask (despite being disproportionally more conservative) and young people… https://t.co/q9GKu7w9gN', 'id': 1394327969280102407, 'Usr_loc': 'Gulf of Guinea', 'hashtags': []}
{'text': 'RT @cavaciuti10: *Moves to America in 2015* \nGains his citizenship  white_heavy_check_mark \nGets a bachelors degree  white_heavy_check_mark \nInternational fooseball player  white_heavy_check_mark \nFriend for…', 'id': 1394327969364123653, 'Usr_loc': None, 'hashtags': []}
{'text': 'RT @sdpofindia: Oh Modji! You arrested 17 people for exposing  your misgovernance. Now the whole nation is raising questions. Can you put a…', 'id': 1394327969397501952, 'Usr_loc': 'TEMPORARY', 'hashtags': []}
{'text': '@Luca31404488 Exactly the same as ALL divorced couples..', 'id': 1394327969301254151, 'Usr_loc': 'Carlow, Ireland', 'hashtags': []}
{'text': '@WinnieThaPew Good luck and all the best man :)', 'id': 1394327969485647885, 'Usr_loc': 'Earth', 'hashtags': []}
{'text': 'RT @CD929fm: CONCERT ANNOUNCE #2! Columbus date has been added for the Hella Mega Tour with @GreenDay, @Weezer, and @falloutboy 8/17 at His…', 'id': 1394327969141776384, 'Usr_loc': 'C-bus', 'hashtags': []}
{'text': 'In Taunggyi, Shan State, junta thugs inspect all the bypassing vehicles in front of Hnin Lwin Lwin Photography shop… https://t.co/0efCVDg7Co', 'id': 1394327969183666182, 'Usr_loc': None, 'hashtags': []}
{'text': 'RT @amberkgoodwin: Sorry not sorry in advance for all the law graduation photos y’all are about to get. I’m 41, never been married, have no…', 'id': 1394327969544302592, 'Usr_loc': None, 'hashtags': []}
{'text': 'RT @LJKOT7s14: Why are Koo and Tae dancing like my dad and uncles! All I need is a shuffle and you couldn’t tell me I wasn’t at a family fu…', 'id': 1394327969443815430, 'Usr_loc': 'Chicago, IL 🇺🇸', 'hashtags': []}
{'text': 'RT @MrAndyNgo: Israel says your building also housed Hamas military assets. All of you were given warning to evacuate, which you did, befor…', 'id': 1394327969456340994, 'Usr_loc': None, 'hashtags': []}
{'text': 'RT @DrawerSide: He’s a danger to be around, poisonous to all https://t.co/uPIzCLXq0c', 'id': 1394327969527701508, 'Usr_loc': '🇺🇸🏳️\u200d🌈', 'hashtags': []}
{'text': 'Woooooowwwww it’s giving cps, dyfs, dcf it’s giving all of it', 'id': 1394327969657720834, 'Usr_loc': 'Your Mom', 'hashtags': []}
{'text': ' eyes  following for tips', 'id': 1394327969930244096, 'Usr_loc': 'San Francisco', 'hashtags': []}
{'text': "RT @exo_statistics: 'DON'T FIGHT THE FEELING (Expansion Ver.)' debuts at #1 on Ktown4u Daily Chart (5/17/21) with 20,105 copies sold!  fire \n\n—…", 'id': 1394327969930223619, 'Usr_loc': 'EXO PLANET', 'hashtags': []}
{'text': 'RT @IfyWorks: I think about what my parents endured navigating systems meant to protect them.\n\nWe gotta shame the systems. Not those harmed…', 'id': 1394327969905225732, 'Usr_loc': None, 'hashtags': []}
{'text': 'RT @ScottZILWarrior: I will send one random person $1000 in 72hrs all you have to do is RT and be following myself @JackHODLr &amp; @WolfyStree…', 'id': 1394327969938624518, 'Usr_loc': 'alegria', 'hashtags': []}
{'text': '@peeclouds I HAD MY VOLUME ALL THE FU CB K ING WAY UP I’M GOING TO DIE', 'id': 1394327972564381704, 'Usr_loc': 'xey/xem he/it/any | cbyf', 'hashtags': []}
{'text': "RT @StayHyunjin2321: All we want is a statement about Hyunjin. The fans shouldn't be having to guess and create theories about when he is c…", 'id': 1394327972610510850, 'Usr_loc': None, 'hashtags': []}
{'text': '@_petitemma_ @ICuckoldress All three', 'id': 1394327972602015749, 'Usr_loc': None, 'hashtags': []}
{'text': "RT @TommyWTF1: Wrote a thing. I know a lot of people have been suggesting this too recently. \n\nFeels like with Liberty in charge it's somet…", 'id': 1394327972627329025, 'Usr_loc': None, 'hashtags': []}
{'text': 'RT @CisNyakundi: Spread  all over https://t.co/QWOrOw8EK7', 'id': 1394327972656594946, 'Usr_loc': 'The space between.', 'hashtags': []}
{'text': 'RT @BUSANBOY___TWT: To be an ‘IT BOY’, the Artist needs to be #1 in Charts, #1 in Sales, #1 in Fashion, #1 in Marketability, #1 in Global M…', 'id': 1394327972769849344, 'Usr_loc': '#PJMs🐣💛 JM says MY FANS🎉', 'hashtags': []}
{'text': 'helping moots 🤍', 'id': 1394327972719382528, 'Usr_loc': 'Western Visayas', 'hashtags': []}
{'text': ' double_exclamation_mark ️STREAMING PARTY MV NEXT LEVEL AESPA  double_exclamation_mark ️\n@aespa_official \n\ntag: @macosyy @aespain4k @myglamorina @holyizhuo… https://t.co/PAiUF9VwwV', 'id': 1394327971859738625, 'Usr_loc': 'ncity, KWANGYA', 'hashtags': []}
{'text': 'RT @ScottyAmerica1: Communist Overlords at YouTube Delete Viral Interview with Dr. Cole Revealing Covid Jabs Have Killed More People Than A…', 'id': 1394327972774092800, 'Usr_loc': None, 'hashtags': []}
{'text': 'elemayo i told myself i wouldnt change my pfp until all the pics were out https://t.co/avMxSgE6EL', 'id': 1394327972782350337, 'Usr_loc': 'txt svt en- bts', 'hashtags': []}
{'text': "All my lil cousins still call me Shay Shay and then there's the older ones that's just lazy calling me Shay lol", 'id': 1394327973017309184, 'Usr_loc': 'Not in America. ', 'hashtags': []}
{'text': 'RT @JYSexton: The Right’s obsession with abortion was about laundering their animating influence of segregation and white supremacy while g…', 'id': 1394327972870598658, 'Usr_loc': 'Louisiana, USA', 'hashtags': []}
{'text': 'RT @neptunebrewery: Thanks to all those who’ve booked into the taproom this coming weekend. We can’t wait to have you come    visit us!  trident_emblem \nW…', 'id': 1394327972983840770, 'Usr_loc': 'Ormskirk, England', 'hashtags': []}
{'text': "RT @pledis_17: [17'S] We sat down for another whimderful conversation with @wmag for the Music Issue upside-down_face \nRead all about it here!\nhttps://t.co/…", 'id': 1394327973008924672, 'Usr_loc': '원우’s ♡', 'hashtags': []}
{'text': '@Auryyyy All the time smh  person_shrugging  medium-dark_skin_tone \u200d male_sign ️ face_with_tears_of_joy ', 'id': 1394327972950196227, 'Usr_loc': 'Everywhere', 'hashtags': []}
{'text': '@dysmorphia_wb Cue all the dudes volunteering to rub aloe on it or kiss it and make it better.', 'id': 1394327972996337667, 'Usr_loc': None, 'hashtags': []}
{'text': 'In Taunggyi, Shan State, junta thugs inspect all the bypassing vehicles in front of Hnin Lwin Lwin Photography shop… https://t.co/lxaJBlICg0', 'id': 1394327972740481034, 'Usr_loc': None, 'hashtags': []}
{'text': "RT @stonewalluk: This International Day Against Homophobia, Biphobia, and Transphobia, we are reminded there's still a long way to go until…", 'id': 1394327973034139652, 'Usr_loc': 'West Yorkshire ', 'hashtags': []}
{'text': 'RT @Ann_Niji17: Happy 25years in the industry Matsumoto Jun!  purple_heart \nThank you for sharing your talent with us. Thank you for introducing me to A…', 'id': 1394327973067583488, 'Usr_loc': 'Jakarta Capital Region, Indone', 'hashtags': []}
{'text': 'RT @GL0SSRACHA: minho has a distinct way of dancing tht makes him one of the best dancers of the generation,, say all u want but no 4th gen…', 'id': 1394327972983803905, 'Usr_loc': 'uk', 'hashtags': []}
{'text': 'RT @EssexPR: Lower ‘cases’ amongst all the fear mongering..\nDeaths at just 5.\n\nNothing to see here. https://t.co/l728moIzCa', 'id': 1394327973151576066, 'Usr_loc': None, 'hashtags': []}
{'text': "@ughluvjoy to be associated with people in drama, and quite obviously it has. They should've at least considered wi… https://t.co/COUFIvuXc1", 'id': 1394327973117890565, 'Usr_loc': 'he/they', 'hashtags': []}
{'text': '@Snipewituzi @CWrestlingUK I love horror movies and I get both of you completely all that shit is waaay worse but i… https://t.co/4UtncC0VJb', 'id': 1394327973185003524, 'Usr_loc': 'Calgary, Alberta', 'hashtags': []}
{'text': 'RT @ammnontet: remember this? ah, probably not. after all, it was a long tamago https://t.co/9wK7JtvItO', 'id': 1394327973180760064, 'Usr_loc': 'Coming from inside your house!', 'hashtags': []}
{'text': 'RT @7Veritas4: Remember when America was settled by people fleeing from religious persecution?\n\n...a welcoming beacon for people from all w…', 'id': 1394327973336125441, 'Usr_loc': 'Da Burbs', 'hashtags': []}
{'text': 'If y’all stopped going to Dora y’all wouldn’t have to worry about that shit  loudly_crying_face ', 'id': 1394327973415772160, 'Usr_loc': None, 'hashtags': []}
{'text': '@DFBHarvard @AngelWarrior320 @latenitebobbyd @LindaHale8006 @MalcolmOutLoud @MsAvaArmstrong @Ohio_buckeye_us… https://t.co/za1vxfY8qO', 'id': 1394327972778332160, 'Usr_loc': 'USA', 'hashtags': []}
{'text': "RT @PR0DUGHTAN: Where the ppl who said that BTS are forced to wear this forced to do that listen mfs y'all getting embarrassed omg  loudly_crying_face  https:…", 'id': 1394327973524774914, 'Usr_loc': None, 'hashtags': []}
{'text': 'RT @oluwatosinn_: fine dark men all over my tl damn \nlord this a sign ? flushed_face ', 'id': 1394327973566746630, 'Usr_loc': None, 'hashtags': []}
{'text': "Y'ALL DIDN'T BOT FOR BR'AAD OR SYLNAN?!", 'id': 1394327973667422208, 'Usr_loc': 'any pronouns | 17', 'hashtags': []}
{'text': "RT @Davy_Acko: Can everyone please read this. A key worker, London bus driver David O'Sullivan has been sacked for raising safety concerns…", 'id': 1394327973675905024, 'Usr_loc': 'Michigan, USA', 'hashtags': []}
{'text': "RT @softfIuffs: ngl interviews bore me a lot especially those long ones? yeah. but tonight, it wasn't. all of them were great speakers with…", 'id': 1394327973747040256, 'Usr_loc': 'Tacloban City, Eastern Visayas', 'hashtags': []}
{'text': 'RT @iamlaurenp: This has slain me all day. \n\nDogs are just the best. https://t.co/Tx3PgnqvaH', 'id': 1394327973738729473, 'Usr_loc': 'beloryhills', 'hashtags': []}
{'text': '@BradMossEsq Even my three year old gets it. She knows people are sick and until we all get medicine we have to be… https://t.co/OgZxpQRdwj', 'id': 1394327973793173507, 'Usr_loc': None, 'hashtags': []}
{'text': "@McDonalds @BTS_twt dude, i'd save up and use all my money to get him a mcdonald's franchise.", 'id': 1394327973721886720, 'Usr_loc': None, 'hashtags': []}
{'text': 'None muslims and orthoodox jews were at the.protests too  hugging_face ', 'id': 1394327973747118081, 'Usr_loc': 'London / Assyria', 'hashtags': []}
{'text': '@TrumpVideoDocu1 @sammyjbray @IainFletcher8 @AyoCaesar @BBCWomansHour This is basic safeguarding principles. \n\nTher… https://t.co/mZNrD8NRLJ', 'id': 1394327974086942723, 'Usr_loc': 'Somewhere Out There', 'hashtags': []}
{'text': 'RT @lastnightsnora: I’m the friend you can cancel on, it’s definitely ok I won’t be mad at all', 'id': 1394327974145667075, 'Usr_loc': None, 'hashtags': []}
{'text': 'All love ain’t real  crossed_fingers  medium-dark_skin_tone  look out for who look out for you  hundred_points ', 'id': 1394327974338600971, 'Usr_loc': 'Brooklyn, NY ', 'hashtags': []}
{'text': 'RT @lilhornygeek:  sweat_droplets  Cum help me live my fantasies sweat_droplets \n FREE_button  Over 800 pieces of XXX media instantly available\n face_with_stuck-out_tongue_&_winking_eye  Weekly FREE full length videos\n locked_with_key  PP…', 'id': 1394327974283943937, 'Usr_loc': None, 'hashtags': []}
{'text': "@realaurafi Wow, I am very amazed and can't wait for the project with all the revolutions and innovations embedded… https://t.co/txtyupZL8n", 'id': 1394327974112018432, 'Usr_loc': 'Osun, Nigeria', 'hashtags': []}
{'text': 'RT @433: I could watch an @ErlingHaaland interview all day, every day  rolling_on_the_floor_laughing  microphone  \n\n movie_camera  @DFBPokal_EN https://t.co/HBpSOOadte', 'id': 1394327974321790986, 'Usr_loc': None, 'hashtags': []}
{'text': "RT @isthatharper: why are y'all STILL openly telling people that you fuck dirty men??", 'id': 1394327974221070338, 'Usr_loc': None, 'hashtags': []}
{'text': 'RT @EHSANI221: Inter-Regional commerce and Trade is the only sustainable path forward for the Levant region\n\nThe quicker this is the realiz…', 'id': 1394327976720875524, 'Usr_loc': None, 'hashtags': []}
{'text': 'Can someone tell me wtf is this new Ratio thing all about on here?  face_with_tears_of_joy  face_with_tears_of_joy  face_with_tears_of_joy ', 'id': 1394327976775503875, 'Usr_loc': 'Philadelphia, PA', 'hashtags': []}
{'text': 'RT @IfyWorks: I think about what my parents endured navigating systems meant to protect them.\n\nWe gotta shame the systems. Not those harmed…', 'id': 1394327976691572744, 'Usr_loc': 'South Slope, Brooklyn', 'hashtags': []}
{'text': "RT @tgwdlm_bot: 'Cause I may not have a home\nBut that's way okay\n'Cause I prefer to roam\nThe streets all day", 'id': 1394327976842448899, 'Usr_loc': 'A Sea of Disappointments', 'hashtags': []}
{'text': 'RT @popoffdia: i miss quackity all the time', 'id': 1394327976842604552, 'Usr_loc': 'even though my dizzy head is numb i swear my heart is never giving up', 'hashtags': []}
{'text': 'RT @jonasabadilla: Better suggestion: Don’t call at all unless you messaged the person beforehand to ask permission for a call', 'id': 1394327976750112772, 'Usr_loc': None, 'hashtags': []}
{'text': 'RT @BBWMilfForCam: Who loves ALL my sexy rolls? \nKeep them or delete them? \ncheck my pinned tweet for links to more of this sexy BBW https:…', 'id': 1394327976829935618, 'Usr_loc': '18+ ONLY', 'hashtags': []}
{'text': 'RT @sharkyrae: STORY TIME: ALL my sisters and brother suffered from chickenpox because there was NO vax at the time! \n\nMy mom heard that th…', 'id': 1394327976834121731, 'Usr_loc': 'NunYa,Tx', 'hashtags': []}
{'text': 'Because Biden just sent them 260 million dollars.', 'id': 1394327976892899330, 'Usr_loc': 'Tampa Fl. ', 'hashtags': []}
{'text': 'RT @fluffyyhamster: Sejeong: “[If you are cool, you are an unnie]\nUnnie... Unnie!!!!!\nNo, grandmother!!!!!\nONCEs, scream!!! Ahhh!!\nI watche…', 'id': 1394327977043759106, 'Usr_loc': 'SG based', 'hashtags': []}
{'text': 'The Greatest Song Of All Time https://t.co/9ucEnhS9Tg', 'id': 1394327976683220996, 'Usr_loc': 'United States', 'hashtags': []}
{'text': 'It’s Miami sis 3 days is all u need lol', 'id': 1394327976955764740, 'Usr_loc': 'NJ', 'hashtags': []}
{'text': 'RT @maNkomo16: @BruceChakatsva Not at all hey.', 'id': 1394327977224200193, 'Usr_loc': 'Afrika', 'hashtags': []}
{'text': 'RT @Francis35064127: @festipostnicken Divided and conquered by das bagelmeister must be prevented at all costs.', 'id': 1394327977131921414, 'Usr_loc': None, 'hashtags': []}
{'text': "RT @kine_abel: @Loquacious_Lion Too much power at center. \nBalkanizing into a true federation wouldn't be a bad idea. Federal govt should h…", 'id': 1394327977161199618, 'Usr_loc': None, 'hashtags': []}
{'text': 'RT @publichealthni: On International Nurses Day we celebrate the vital role all out nurses play. Hear from 1 or our Specialist Nurses for O…', 'id': 1394327977194831872, 'Usr_loc': 'Belfast', 'hashtags': []}
{'text': '@Mogitez75 @TheGingerPirlo_ The problem is taa has been poor when he has played wingback for england and probably i… https://t.co/9XpCDW9hSh', 'id': 1394327977140400134, 'Usr_loc': None, 'hashtags': []}
{'text': 'RT @CBowlingAg: From the initial pull of that string tab or pull of the box door, @GldnHarvest has got you covered all season long! #Whatev…', 'id': 1394327977182248966, 'Usr_loc': 'Downers Grove, IL', 'hashtags': []}
{'text': 'RT @TallGlassofStyL: Y’all make parenthood and marriage sound like the 9th level of hell. https://t.co/glYv9z81EB', 'id': 1394327977228439552, 'Usr_loc': 'Atlanta ', 'hashtags': []}
{'text': 'RT @misanthropicc92: Someone once said Twitter is the sociology seminar where no one has done the reading but everyone is speaking. I think…', 'id': 1394327977358413826, 'Usr_loc': 'Leeds, generally', 'hashtags': []}
{'text': 'RT @heistemi1: Design…a balance between form and function…it takes two.- Seesaw\n\nA four bedroom all ensuite bungalow design with two living…', 'id': 1394327977446547460, 'Usr_loc': 'Top Of The World!*', 'hashtags': []}
{'text': '@Ganjam_Admin @SonuSood So instead of being quick to denigrate ppl who are actually trying best in their power to h… https://t.co/h4yVjuOT87', 'id': 1394327977341558786, 'Usr_loc': None, 'hashtags': []}
{'text': 'Biden is a war criminal and you who voted for him are responsible for his actions.', 'id': 1394327977413025797, 'Usr_loc': 'Chicago, IL', 'hashtags': []}
{'text': "RT @thisdayinkpop: 5 years ago today Monsta X released their third EP, 'The Clan Pt. 1 Lost', as well as the music video for the title sing…", 'id': 1394327977467555841, 'Usr_loc': 'she/her ', 'hashtags': []}
{'text': "RT @michaelharriot: Y'all seen this? https://t.co/EANM3Z9aYB", 'id': 1394327977534517253, 'Usr_loc': 'Oakland, CA', 'hashtags': []}
{'text': 'RT @ethereal_healer: People underestimate my ability to cut off all emotional ties and literally never speak to them again', 'id': 1394327977664684038, 'Usr_loc': None, 'hashtags': []}
{'text': "RT @KhariKhonsu: Remember how I got kicked out for being gay? Now, I need $150 for rent monthly starting this Wednesday. I've been using al…", 'id': 1394327977547157506, 'Usr_loc': 'West Wyomissing, PA', 'hashtags': []}
{'text': '@michell24823204 Michelle I am so, truly sorry about your Mum. The @dwp have so much blood on their hands! They con… https://t.co/6dH7ECEWqj', 'id': 1394327977501020161, 'Usr_loc': None, 'hashtags': []}
{'text': '(@ people who wanna kill/hurt people with Starecrown:)\n\n(Stare is a curious man who wants to learn all he can to fi… https://t.co/N4UuWfu218', 'id': 1394327977522089987, 'Usr_loc': 'EKC : 10', 'hashtags': []}
{'text': 'all of the above methinks', 'id': 1394327977626898443, 'Usr_loc': None, 'hashtags': []}
{'text': 'RT @arsalan_khan95: I am not so proud of my army after all this!\n\nI am not so proud of calling Pakistan the castle of Islam!\n\nAnd I was nev…', 'id': 1394327977798799362, 'Usr_loc': 'Pakistan', 'hashtags': []}
{'text': '@anjani_mistry @TikTokSupport My tiktok also got  banned for reasons unknown to me, after contacting the support wi… https://t.co/OUuvwaTGPh', 'id': 1394327977786216452, 'Usr_loc': 'Los Angeles, CA', 'hashtags': []}
{'text': 'RT @CutAyer: I can confirm I have heard some rumblings behind the scenes but always take things with a grain of salt. not sure where all th…', 'id': 1394327977811349508, 'Usr_loc': None, 'hashtags': []}
{'text': "RT @ImranKhanPTI: Strongly condemn Israeli Forces' attack esp during Ramazan on Palestinians in Qibla-e-Awaal, Al-Aqsa Mosque, violating al…", 'id': 1394327977966637059, 'Usr_loc': 'Sindh, Pakistan', 'hashtags': []}
{'text': '@HMB988 @Alan_Sneider66 @Jay_999wrld did the disciples steal the body? no. there was multiple roman Soldiers guardi… https://t.co/isSXdv8Wmi', 'id': 1394327977891074048, 'Usr_loc': '4x NBA Champion ', 'hashtags': []}
{'text': 'RT @muzahamat: @KhaledBeydoun They are too busy show the "Massive Support" from India in favor of Israel.\n\nAll 17 of these Covid Ridden  MF…', 'id': 1394327978084126726, 'Usr_loc': None, 'hashtags': []}
{'text': 'RT @xogabbyelle: Dads have it made. Don’t gotta know their kids birthday, what they allergic to, name of their school, their favorite food,…', 'id': 1394327977966673921, 'Usr_loc': 'Michigan✈️Florida', 'hashtags': []}
{'text': 'Bro a lot of people need understand this', 'id': 1394327977974980608, 'Usr_loc': None, 'hashtags': []}
{'text': 'RT @ALLMEP: Join @ALLMEP &amp; our members @WomenWagePeace @TagMeir @Hand_in_Hand &amp; many others on Wednesday 3pm at Jaffa Gate calling for peac…', 'id': 1394327977975074816, 'Usr_loc': 'Israel and Palestine', 'hashtags': []}
{'text': 'RT @ceonct_: Giveaway Saldo  sparkles \nall e-wallet or pulsa\n\n- follow + rt\nEND besokk', 'id': 1394327978063011841, 'Usr_loc': 'she/her', 'hashtags': []}
{'text': '@bluesidehoseok Omg I saw you did  face_with_tears_of_joy  I was like Kayla is just gonna own all the colors at this rate. They have a purple one yet?  rolling_on_the_floor_laughing ', 'id': 1394327978121867274, 'Usr_loc': 'Washington, DC', 'hashtags': []}
{'text': '@debarshi123 Guten Tag, here is your unroll: This thread is directed to all of you searching for plasma donors…… https://t.co/3kvulkAmBG', 'id': 1394327978042134533, 'Usr_loc': 'Wherever threads are written..', 'hashtags': []}
{'text': "@Rhinox856 Guessing things aren't better all around, huh?", 'id': 1394327978184687616, 'Usr_loc': 'Cloud City', 'hashtags': []}
{'text': 'RT @DROLARODEF: @thulhadi2 @sara_malika_ @iraqidrphil No countries act out of "goodness of hearts" they all have motives', 'id': 1394327978264387587, 'Usr_loc': 'United States', 'hashtags': []}
{'text': '"All Peach players are all either gay or female"\n-Ken', 'id': 1394327981036752903, 'Usr_loc': None, 'hashtags': []}
{'text': 'RT @mogulwoman: Y’all I’m looking for an HR executive role \nMust be on the mainland \nI have almost 3years experience \nRefer me please dears…', 'id': 1394327980797833218, 'Usr_loc': 'Kano, Nigeria', 'hashtags': []}
{'text': 'RT @TusharVijh: May Lord Parshuram fulfill all your desires and fill your life with beautiful moments.\n\nHappy Parshuram Jayanti!!\n#जय_भगवान…', 'id': 1394327980936024065, 'Usr_loc': 'Patna, India', 'hashtags': []}
{'text': '@Madammoody2 Shame he died, but our invasion of Afghanistan is also controversial, a country that did us no harm. T… https://t.co/Ffv6LCf8dX', 'id': 1394327980990771207, 'Usr_loc': 'Kent, UK', 'hashtags': []}
{'text': 'RT @pilliarscreatio: July 2018 and the demolition of the 2 launch towers at complex 17 at the Cape. One of the last remaining links to the…', 'id': 1394327981175283718, 'Usr_loc': 'United Kingdom', 'hashtags': []}
{'text': 'RT @ty_hotcommodity: a lot of topics could die if y’all asked yourself “how does this impact me” “”am I minding my business or somebodies e…', 'id': 1394327981330472966, 'Usr_loc': 'tuhrawnno', 'hashtags': []}
{'text': 'RT @BooNon_98: Twice : Taste of Love\nMonsta X : Flavors of Love\nSeventeen : Power of Love\n\nJune month is all about Love two_hearts  two_hearts  two_hearts  two_hearts !!!!', 'id': 1394327981300994053, 'Usr_loc': 'SVT MX7 BTS⁷ SKZ WAYV GOT7 SM', 'hashtags': []}
{'text': 'RT @VTeamBase:  police_car_light Spotify Update police_car_light  [May 17th]\n\n warning ️Rates are down_button on all tracks https://t.co/5IYXLfY5Ll', 'id': 1394327981338685441, 'Usr_loc': "you're precious♡", 'hashtags': []}
{'text': "RT @SandraWeeden: I am forming the impression that those who have received their 'shot' are exasperated (to put it mildly) by those who dec…", 'id': 1394327981343006724, 'Usr_loc': 'Coventry, England', 'hashtags': []}
{'text': "RT @Bgoddess86: If The Republican party wasn't overtly racist, y'all would def vote for them because y'all really bought into that welfare…", 'id': 1394327981376610312, 'Usr_loc': 'Earth', 'hashtags': []}
{'text': "RT @CrusadeNerd: TONIGHT!! 6:30PM MST!!\n\nhttps://t.co/jFuvtw54zn\n\nWe hunting Legendaries in the Crown Tundra and then we'll switch to some…", 'id': 1394327981485613058, 'Usr_loc': None, 'hashtags': []}
{'text': 'What did one person do in your class that you all had to get into trouble for?', 'id': 1394327981678493696, 'Usr_loc': 'Kakinada, India', 'hashtags': []}
{'text': 'maybe music is not her first priority like seriously I don’t think she’s into it like she was once was  and that’s… https://t.co/elOjJM4SEX', 'id': 1394327981590556675, 'Usr_loc': None, 'hashtags': []}
{'text': 'RT @missyBankera: Not esbi related but I want to say that everytime Kisses speaks, it touches me in a deeper level. She always talks from t…', 'id': 1394327981665898499, 'Usr_loc': 'Republic of the Philippines', 'hashtags': []}
{'text': "Just my friends talking about their faves' cb. SANA ALL NAG CO-COME BACK https://t.co/i3tDilUaPO", 'id': 1394327981405868040, 'Usr_loc': None, 'hashtags': []}
{'text': '@gnfquackity NOW WE JUST NEED YOU TO ADD POPPY AND WATERPARKS AND WE R ALL GOOD', 'id': 1394327981703811072, 'Usr_loc': 'they/she ♡ club 105 gc', 'hashtags': []}
{'text': 'Drop your handles follow all likes and retweets violin  pager  K9  tweet', 'id': 1394327981850566658, 'Usr_loc': 'BIGGEST FOLLOW TRAIN', 'hashtags': []}
{'text': '@PrisonPlanet France is a shithole and Le Pen is getting more and more popular. It’s all going to kick off at some… https://t.co/hNr7dweWke', 'id': 1394327981741518851, 'Usr_loc': None, 'hashtags': []}
{'text': "RT @mwahgogy: just, just a reminder this applies to all cc's lol um, anyways i now fear mcyttwt  grinning_face_with_smiling_eyes  thumbs_up  https://t.co/EXSDBuVSZZ", 'id': 1394327981833826306, 'Usr_loc': 'she/them', 'hashtags': []}
{'text': 'RT @saisangpotirat: I compiled all the looks of Wayu tonight &amp; I can see how he shift from being a hot and intense to a cute &amp; a babie🥺 sparkles Can…', 'id': 1394327981976260612, 'Usr_loc': None, 'hashtags': []}
{'text': 'RT @CassieLee: My boys  red_heart ️\n\nAll my boys  red_heart ️', 'id': 1394327981888262150, 'Usr_loc': None, 'hashtags': []}
{'text': "not in my best mood today but changuk posted so it's all okay ^______^ goodnight moots!! &lt;3 https://t.co/ZOfJJD0zVP", 'id': 1394327981376434176, 'Usr_loc': '+63 ㅡ she/her', 'hashtags': []}
{'text': 'Jim you are a horrible person, and think  about all the millions of people that wish you harm,when you close your e… https://t.co/lsJhQjAbZN', 'id': 1394327981863030785, 'Usr_loc': None, 'hashtags': []}
{'text': "... my twacher is talkinf abt me indirectly in class hes like Hey if u havent done ur work yet uh.. i can't help yo… https://t.co/khtcluf9dQ", 'id': 1394327982051889153, 'Usr_loc': '✿ seventeen ✿', 'hashtags': []}
{'text': 'RT @MarinaNigrelli: TOP TIP:\n\nWhen a Tory minister says, “The public aren’t interested in…”\n\nIt’s something we should all be acutely intere…', 'id': 1394327982102228997, 'Usr_loc': 'United Kingdom', 'hashtags': []}
{'text': ' police_car_light  police_car_light  police_car_light  police_car_light  police_car_light  police_car_light \n fire  fire  fire  fire  fire  fire  fire  fire \nNew Video From IUIC ORLANDO \nIUIC: Lionz Den Radio - Behind Bars: Wrongfully Convicted\n\nPREMIERING… https://t.co/iPQFejKFrY', 'id': 1394327981087145984, 'Usr_loc': 'San Diego, CA', 'hashtags': []}
{'text': 'RT @Dv2021N: Please fight for our sake. We plead with you. We are in pain, we are in injustice. Please fight for our voices. Fight for our…', 'id': 1394327982106349569, 'Usr_loc': None, 'hashtags': []}
{'text': 'The possibility of all those possibilities \n        being possible is just another possibility \n        that could… https://t.co/eYIcsrFfNt', 'id': 1394327980881563653, 'Usr_loc': 'vodcaz • sorbern - etep’s bro ', 'hashtags': []}
{'text': 'RT @JFrusci: With unified control of Washington, Democrats should take the opportunity to get rid of the debt ceiling once and for all, @fo…', 'id': 1394327982098075652, 'Usr_loc': 'Cologne, Germany', 'hashtags': []}
{'text': '( ´･･)ﾉ(._.`)hi all', 'id': 1394327982295166977, 'Usr_loc': None, 'hashtags': []}
{'text': 'RT @blessadj: Bro. After all these years I was just clicking for luck https://t.co/lBf0Y7dVHZ', 'id': 1394327982211219461, 'Usr_loc': None, 'hashtags': []}
{'text': 'Growing up my mom used to refer to my friends by their race: “Where’s your white friend?”, “How’s your black friend… https://t.co/bw0ijSp4bP', 'id': 1394327982219595776, 'Usr_loc': 'NYC', 'hashtags': []}
{'text': 'RT @JustThatGrll: “Black women have embraced delusion and coping mechanisms to avoid reality” - Jason Black \n\nThere is nothing healthy abou…', 'id': 1394327982223806467, 'Usr_loc': None, 'hashtags': []}
{'text': '@naver_taehyung2 @BTS_twt All done likes/ comments/ shares  heavy_check_mark ️', 'id': 1394327982295113730, 'Usr_loc': "Taehyung's nose mole", 'hashtags': []}
{'text': '@SpaghettiKozak @scottkernest @Spoonhead8 @Gertrude8645 Mark me. You’re absolutely right. Guns &amp; ammo all I really… https://t.co/BMXLIUV37b', 'id': 1394327982269886468, 'Usr_loc': 'Atlanta, GA', 'hashtags': []}
{'text': 'RT @arnettwill: We tracked doen @galifianakisz deep in the Canadian wilderness and got him on mic for an all new @SmartLess \n@batemanjason…', 'id': 1394327982462828545, 'Usr_loc': None, 'hashtags': []}
{'text': '@Here4TheSnacks YES YES YESSSS to all of it!! Lol back when I tried it it didn’t even really work that well for me… https://t.co/TRwEBOjIn0', 'id': 1394327982198689804, 'Usr_loc': 'Dallas, TX', 'hashtags': []}
{'text': 'RT @hallamohieddeen: Morning all, just a reminder that our Gaza offices were bombed and destroyed 2 days ago. Israel has yet to provide any…', 'id': 1394327982441844737, 'Usr_loc': 'New Delhi, India', 'hashtags': []}
{'text': ' field_hockey  LH1 saw the opportunity to go outside while the sun shone for this week’s P.E lesson. LH1 did so well mastering t… https://t.co/VdLr4zeg3Z', 'id': 1394327981074563077, 'Usr_loc': 'Llandeilo, Wales', 'hashtags': []}
{'text': "RT @whitney_hu: We aren't going to shy away from this. The system shames, mocks, and penalizes those it doesn't value. Even the signaling f…", 'id': 1394327982450282497, 'Usr_loc': 'Brooklyn, NY', 'hashtags': []}
{'text': '@STPBike I think it’s just my aversion to cold that prevents me from this lifestyle ... now that I no longer need t… https://t.co/FKZKa8GjwP', 'id': 1394327982517362690, 'Usr_loc': 'Calgary, Alberta', 'hashtags': []}
{'text': 'Getting cleared is probably my least favorite thing I have to do all year. I was so thankful we didn’t have to do it last year.', 'id': 1394327982597054464, 'Usr_loc': None, 'hashtags': []}
{'text': 'RT @misanthropicc92: Someone once said Twitter is the sociology seminar where no one has done the reading but everyone is speaking. I think…', 'id': 1394327982668337158, 'Usr_loc': 'Bharat', 'hashtags': []}
{'text': 'RT @kaushikcbasu: Almost all Indians, certainly all who care for the country, are waiting for 2024 the way Indians once waited for 1947.', 'id': 1394327985281376263, 'Usr_loc': 'Sydney', 'hashtags': []}
{'text': "RT @MissMuttoo: Armaan Malik. Eric Nam. KSHMR. For real. Don't know if y'all ready. (Are we?) It was about time a collaboration like this h…", 'id': 1394327985277177860, 'Usr_loc': 'India.', 'hashtags': []}
{'text': '@DukesMayoBowl That’s all I’ve ever wanted to read in my life.', 'id': 1394327985277308934, 'Usr_loc': '512', 'hashtags': []}
{'text': 'Presented without comment.\n\n$ARKK @HalftimeReport', 'id': 1394327985264680965, 'Usr_loc': 'New York', 'hashtags': []}
{'text': 'RT @Yoshi__NY: Me observing all the chaos around me on a daily basis… https://t.co/8eOpduIbsi', 'id': 1394327985365430272, 'Usr_loc': '302 ', 'hashtags': []}
{'text': 'RT @GCR2P: .@EstoniaUN speaking on behalf of @LatviaUN_NY @LithuaniaUNNY:\n\nAccountability, incl. investigations, @UN_HRC mechanisms &amp; #Univ…', 'id': 1394327985335898115, 'Usr_loc': 'United States', 'hashtags': []}
{'text': '@piticu21 ID.4 is out. I would buy a car with made in Europe because of customer care. https://t.co/4uuKhNaE39', 'id': 1394327985189163011, 'Usr_loc': 'Romania', 'hashtags': []}
{'text': '@Lola_Mae2021 @PeterMcCormack @elonmusk Bitcoin has never been and will never be a personality cult. We are all Satoshi!', 'id': 1394327985478463488, 'Usr_loc': 'Block 74638', 'hashtags': []}
{'text': 'The number of annoying ass social media couples accounts that I’ve blocked  loudly_crying_face  like why do they think it’s cute and f… https://t.co/h9a3Hkm7gB', 'id': 1394327985482649601, 'Usr_loc': 'Bay Area, CA', 'hashtags': []}
{'text': 'RT @hrkbenowen: Macy’s Pulls All Chrissy Teigen Products After Messages Show How She Bullied A Teen Girl  https://t.co/P9c8Xy5lTY', 'id': 1394327985461862401, 'Usr_loc': 'USA', 'hashtags': []}
{'text': 'RT @glennkirschner2: Hey All. Will be joining @craigmelvin @MSNBC at 11 am ET to discuss breaking legal developments. Hope you’ll join us.', 'id': 1394327985591922691, 'Usr_loc': 'United States', 'hashtags': []}
{'text': "RT @JhaSanjay: Canada has at least 5 times vaccines ordered over it's population size. The same and more applies to USA, slightly less in U…", 'id': 1394327985663086592, 'Usr_loc': None, 'hashtags': []}
{'text': 'RT @neezzah: Follow all who likes and retweets this  fish_cake_with_swirl ,  green_salad ', 'id': 1394327985633865728, 'Usr_loc': 'Kampala, Uganda', 'hashtags': []}
{'text': 'Online shauping best quality girls and women all products ecommerce business affiliate marketing login affiliate be… https://t.co/vLNQkeoNfC', 'id': 1394327985382113283, 'Usr_loc': 'Bokaro, Jharkhand 827013 India', 'hashtags': []}
{'text': 'I see you @ZssBecker  flushed_face  Hands down $ERG will be your best play all year. Now there’s no way I beat your  crypto ROI… https://t.co/ri5XRflFMe', 'id': 1394327985285582849, 'Usr_loc': 'USA', 'hashtags': []}
{'text': "@BrnEyeSuss Why are you so angry?\n\n1. Community transmission isn't where it needs to be. Here's the CDC's own chart… https://t.co/z0AUeN86rT", 'id': 1394327985067544576, 'Usr_loc': 'Florida, USA', 'hashtags': []}
{'text': 'This lyrics always hit me', 'id': 1394327985734529024, 'Usr_loc': None, 'hashtags': []}
{'text': 'RT @stfuvienbbn: literally all the time https://t.co/CpeenZ6bkz', 'id': 1394327985868525569, 'Usr_loc': None, 'hashtags': []}
{'text': 'RT @StickboyBangkok: Social media users are asking why are they not cleaning up all the khlongs... https://t.co/TgCOwwPewY', 'id': 1394327985889501185, 'Usr_loc': None, 'hashtags': []}
{'text': '14 billion miles is about the distance I need from all this shit', 'id': 1394327985822441474, 'Usr_loc': 'Portland, OR', 'hashtags': []}
{'text': 'RT @ALforLA2022: With the exception of parking for disabled people, I would love to get rid of ALL parking restrictions in CD13. So many of…', 'id': 1394327986145435648, 'Usr_loc': 'Los Angeles, CA', 'hashtags': []}
{'text': 'RT @BestPornVideos6: All of her holes are stuffed with BBC  smirking_face  smirking_face  https://t.co/a0xe8mVGlv', 'id': 1394327986141384704, 'Usr_loc': None, 'hashtags': []}
{'text': 'I’m in the restroom and all I can hear is my nephew going crazy and my niece telling him “patience santi, patience” 🥺🥺🥺🥺', 'id': 1394327986225172482, 'Usr_loc': 'Donde la vida no vale nada ', 'hashtags': []}
{'text': '@KnightLightXL @Sakuuda @djblackhammer we all do', 'id': 1394327986199961600, 'Usr_loc': None, 'hashtags': []}
{'text': "20% off all Terraria shirts and more during @TeamSanshee's Terraria Anniversary Sale! See the entire collection eyes … https://t.co/FFGr2vZtao", 'id': 1394327985763799042, 'Usr_loc': None, 'hashtags': []}
{'text': '@karennn_e That’s all you can do  folded_hands  medium-dark_skin_tone  it’ll be over soon', 'id': 1394327986271399936, 'Usr_loc': None, 'hashtags': []}
{'text': '@theshreya9 @victoriusms Same hairdo and beard yeah  face_with_tears_of_joy  but Dev is far far far better in all terms OK_hand  https://t.co/8s5lPpBUhY', 'id': 1394327985939881996, 'Usr_loc': 'India', 'hashtags': []}
{'text': "okay but what if we all just fight god so olivia doesn't have a storm", 'id': 1394327986418163718, 'Usr_loc': 'ROCOCO : he / they ', 'hashtags': []}
{'text': 'RT @GNev2: Please see an Open Joint Letter \nhttps://t.co/O3eHaOJecN\n\nPlease sign &amp; share the petition to help create a fairer football for…', 'id': 1394327986283991045, 'Usr_loc': 'Polska', 'hashtags': []}
{'text': "RT @Luyanda_Maf: Protect yourself at all costs, always put yourself first and don't stick around for any rubbish that doesn't serve you", 'id': 1394327986397122562, 'Usr_loc': 'South Africa', 'hashtags': []}
{'text': "@humptacles I don't think they are all truly blue, without some added help from China.  You'd be surprised. \nI'm fa… https://t.co/0Xj3YncC5t", 'id': 1394327986229239808, 'Usr_loc': None, 'hashtags': []}
{'text': '@fire2793 @pochineskyy @twenty1daze @Paola_hr4 What? I’m 20 years old. I’ve been watching him play since he was in… https://t.co/0MA3KaMkLV', 'id': 1394327986350944265, 'Usr_loc': None, 'hashtags': []}
{'text': 'Me af, I be so understanding bc I know how I am  rolling_on_the_floor_laughing ', 'id': 1394327986363682818, 'Usr_loc': 'Memphis, TN', 'hashtags': []}
{'text': 'We sent a message to  the Palestinian people: In your struggle for freedom, you will never be alone. Humanity peopl… https://t.co/gEJlr2gWm2', 'id': 1394327986350944266, 'Usr_loc': None, 'hashtags': []}
{'text': 'RT @Azariasoutdoor: We begin all of our residential weeks with an accredited 16 hour Outdoor First Aid course. We have limited spaces on ou…', 'id': 1394327986564907010, 'Usr_loc': 'DofE Central England', 'hashtags': []}
{'text': '@cinapelayo Hope things start looking up and all is/are well. Good luck with StokerCon. Gonna try to block out some… https://t.co/kK4FhN5shW', 'id': 1394327986518724608, 'Usr_loc': 'Sunshine State', 'hashtags': []}
{'text': 'RT @elevenverses: "The idea that there is actual Palestinian sovereignty in the Gaza Strip or even the West Bank is false. Israel continues…', 'id': 1394327986401337347, 'Usr_loc': None, 'hashtags': []}
{'text': 'RT @KeiganAlexis: Y’all worry about what other people do too much sheesh', 'id': 1394327986711646216, 'Usr_loc': None, 'hashtags': []}
{'text': 'Cyan Creepers \n\nSorry for making skeppy too light, I tried to delete all overlay, light source layer and try changi… https://t.co/xOskj2OdyR', 'id': 1394327985927245826, 'Usr_loc': 'Chiang Mai, Thailand', 'hashtags': []}
{'text': "RT @PhinHarper: So excited about this! Open City is publishing a book celebrating the cultural and social history of London's pubs edited b…", 'id': 1394327986715906051, 'Usr_loc': 'Dublin', 'hashtags': []}
{'text': 'RT @davidfarrier: in all the infuriating reporting on the “israeli-palestinian conflict” it’s the fucking onion that hits the nail on the h…', 'id': 1394327986736963586, 'Usr_loc': None, 'hashtags': []}
{'text': '@Acervantez4 @ArrowbearMoore @Walton_Emily While I agree that not all Rs are good....lately, I am not convinced tha… https://t.co/vX4iMjjat0', 'id': 1394327986728357888, 'Usr_loc': 'Meridian, Idaho, USA', 'hashtags': []}
{'text': '@kobesomali Y’all both are.  person_shrugging  medium_skin_tone \u200d female_sign ️', 'id': 1394327986871148545, 'Usr_loc': 'at mi casa', 'hashtags': []}
{'text': '@moot72 @BoSnerdley @nypost Biden does all the time!', 'id': 1394327989278683143, 'Usr_loc': None, 'hashtags': []}
{'text': 'Got all 10”s waiting on me in Colombia  face_with_tears_of_joy  face_with_tears_of_joy  face_with_tears_of_joy  face_with_tears_of_joy  person_facepalming  medium-dark_skin_tone \u200d male_sign ️ person_facepalming  medium-dark_skin_tone \u200d male_sign ️ person_facepalming  medium-dark_skin_tone \u200d male_sign ️', 'id': 1394327989320486921, 'Usr_loc': 'DadeCounty#305🥇🏆👑', 'hashtags': []}
{'text': 'RT @IFC_org: Have you been to our website lately? Please take a moment to fill out this important survey. We need your feedback to help us…', 'id': 1394327989253455876, 'Usr_loc': 'Federal Capital Territory, Nigeria', 'hashtags': []}
{'text': 'I wrote a thing. \n\nCheck it out at https://t.co/YhF9XcEpEe\n\nHopefully it all makes sense and I should be posting mo… https://t.co/h31RdrmCzk', 'id': 1394327989266026496, 'Usr_loc': None, 'hashtags': []}
{'text': 'RT @TaliaLerner: The brightest silver lining of COVID may be a wave of new/better vaccines against all sorts of viruses thanks to mRNA vacc…', 'id': 1394327989345832971, 'Usr_loc': 'UNAM, México', 'hashtags': []}
{'text': "RT @JohnOberg: Fish spend all day, every day, trying to escape these hellish, disease-ridden fish farms, only to remain trapped until they'…", 'id': 1394327989425422336, 'Usr_loc': None, 'hashtags': []}
{'text': '@Mazigburugburu1 God, i already have the heart to give. All i ask for is the opportunity and resources. Mazi, thank… https://t.co/nBwMi2WZP4', 'id': 1394327989551341575, 'Usr_loc': None, 'hashtags': []}
{'text': '@NYJETLIFE @zed_run I just want to know what happened to all the horses in the broken link?', 'id': 1394327989719117829, 'Usr_loc': None, 'hashtags': []}
{'text': 'RT @RafflesLuna: Giveaway time! 🥳\n\nPrizes:\n1x @RafflesLuna Copy\n1x @BypassProxiesI0 2GB Resi\n1x @SauceProxy 2GB Resi\n1x @Nova_Bott Beta Cop…', 'id': 1394327989635227656, 'Usr_loc': 'Neverland', 'hashtags': []}
{'text': "@ONIKALEGIT @mngomezulu_welz @Empressice3 @Playboykenxx_2 It ain't gan happen...\nIt'll backfire on all their asses", 'id': 1394327989744197634, 'Usr_loc': 'Kaduna, Nigeria', 'hashtags': []}
{'text': "clawing against your skin\nclutching my neck said, it's all supposed to end like this", 'id': 1394327989790330888, 'Usr_loc': None, 'hashtags': []}
{'text': 'RT @realshnee: shinee really cleared the industry with odd like listening back it was a reset for korea they sent all the girlies back to t…', 'id': 1394327989740048392, 'Usr_loc': 'hicran, muslim, she/her, 20+ ', 'hashtags': []}
{'text': 'Sharing one bathroom is not cool man. Not cool at all.', 'id': 1394327989978992641, 'Usr_loc': None, 'hashtags': []}
{'text': 'RT @anergaard: Happy National Day to Norway 🇳🇴 &amp; all Norwegians in Singapore! Today, our Constitution is 207 years old &amp; we celebrate freed…', 'id': 1394327989911900164, 'Usr_loc': 'Manti, Utah', 'hashtags': []}
{'text': "The way we've been eating all month &gt;&gt;&gt;&gt;", 'id': 1394327989953912834, 'Usr_loc': 'deep in korean business', 'hashtags': []}
{'text': 'RT @BTSPressData: “People say that I excel, that I’m an all-rounder. Of course I excel in some areas, but I don’t think it necessarily help…', 'id': 1394327989882691591, 'Usr_loc': None, 'hashtags': []}
{'text': 'RT @age_usa: Omg  face_screaming_in_fear  10 modes Male  speaking_head  Masturbators which help you to enjoy all kinds of stimulation envelope_with_arrow \nordinary automatic masturbator move  UP!_button  and…', 'id': 1394327990008483845, 'Usr_loc': None, 'hashtags': []}
{'text': "RT @F1: Iconic drivers, all now yours to own in F1 2021 🤩\n\nRace with seven of F1's greatest drivers in My Team mode with the Deluxe Edition…", 'id': 1394327990012715014, 'Usr_loc': None, 'hashtags': []}
{'text': '@BlueEmu1 @jesselittle97 @TeamBJMcLeod @Aric_Almirola @StewartHaasRcng @Stouffy21 Thank you very much.  Completely… https://t.co/DkTr39dlqS', 'id': 1394327989861720065, 'Usr_loc': 'Maryland', 'hashtags': []}
{'text': 'Thank you ALL so very much for your service! 🇺🇲 red_heart 🤍 blue_heart 🇺🇲 https://t.co/BUK4gXyKf3', 'id': 1394327989681369091, 'Usr_loc': 'Ohio, USA', 'hashtags': []}
{'text': 'RT @bridgettdevoue: Whenever people say all my pics look good... cause I don’t post these :P https://t.co/o9Idui9fdk', 'id': 1394327990004293638, 'Usr_loc': None, 'hashtags': []}
{'text': 'i feel everything all at once', 'id': 1394327990130053130, 'Usr_loc': None, 'hashtags': []}
{'text': 'RT @HausofHilton: We are all bad in someone’s story.\n\nBut that is their story, not the story that involves you.\n\nSo if you are neutral, kee…', 'id': 1394327990222299144, 'Usr_loc': None, 'hashtags': []}
{'text': '@youreyesjoon Oh wowl\nAll the best', 'id': 1394327990188707846, 'Usr_loc': None, 'hashtags': []}
{'text': 'RT @jasminericeeee: First of all if I acting dotish my man was never defending me like that  loudly_crying_face  face_with_tears_of_joy  he was telling me I doing dumb shit', 'id': 1394327990222393352, 'Usr_loc': 'Trinidad and Tobago', 'hashtags': []}
{'text': 'You deserve someone who will choose you over others. That special person that will love &amp; appreciate all your quirk… https://t.co/ZtKF1bMRa2', 'id': 1394327990306226182, 'Usr_loc': None, 'hashtags': []}
{'text': 'RT @amberkgoodwin: Sorry not sorry in advance for all the law graduation photos y’all are about to get. I’m 41, never been married, have no…', 'id': 1394327990222348299, 'Usr_loc': 'Dallas, TX', 'hashtags': []}
{'text': 'RT @Tyson_Fury: Time to take back what I never lost.\n\nEvery belt there all mine chump! https://t.co/nBDYizOlGX', 'id': 1394327990302093315, 'Usr_loc': None, 'hashtags': []}
{'text': 'Read @sareemakdisi: “the spectacle of racial violence that has swept across cities from Acre to Jerusalem does not… https://t.co/QA1NrfnNVz', 'id': 1394327990176161792, 'Usr_loc': None, 'hashtags': []}
{'text': "RT @smnthtsc: i don't have time to hate anyone, i either love you or i don't care at all", 'id': 1394327990457143298, 'Usr_loc': 'Kuala Lumpur', 'hashtags': []}
{'text': 'RT @annacwebs: Not going to RT that lousy IGN statement but nothing but respect and solidarity for all games journalists who used their pla…', 'id': 1394327990339784705, 'Usr_loc': 'Berlin', 'hashtags': []}
{'text': '@itsamealba @Fire_Gohan A shooting game even more fun than Overwatch. https://t.co/yGyNrGrxE1', 'id': 1394327990339883013, 'Usr_loc': None, 'hashtags': []}
{'text': 'RT @RubiHoliccs: To all our small handles &amp; all those hardworking fans who quietly involve in every activity &amp; give their best, they Suppor…', 'id': 1394327990503313414, 'Usr_loc': 'Indore, India', 'hashtags': []}
{'text': 'There we go, just went through and followed a bunch of people who are following me, so, howdy there all you new mutuals?', 'id': 1394327990545174532, 'Usr_loc': None, 'hashtags': []}
{'text': 'RT @sturdyAlex: Let me see if I have this right: The people who spent the last six years telling us all about the tremendous opportunities…', 'id': 1394327990587297793, 'Usr_loc': 'South East, England', 'hashtags': []}
{'text': '@LeroyWi38010024 @PFF_Fantasy I’m talking skill wise. He isn’t the same. Even if he played all 16 games he would’ve been like top 25 at best', 'id': 1394327990683652110, 'Usr_loc': 'Manitoba, Canada', 'hashtags': []}
{'text': 'To all those proud, independent SC Republicans!  @henrymcmaster how about you work on making SC financially "FREE"?… https://t.co/BG1qo9Lt7g', 'id': 1394327990423760898, 'Usr_loc': None, 'hashtags': []}
{'text': '@Mand2101 @SkyNews Hospitalisations always follow cases which are followed by deaths. Cases rising now could mean b… https://t.co/DE2usOCwbF', 'id': 1394327990545362948, 'Usr_loc': None, 'hashtags': []}
{'text': 'RT @ssnowbeatzGhg: First 50 entries will receive 20gh worth of airtime each and all participants win 1 free Perk Milkrich carton. \nT and C’…', 'id': 1394327990763462657, 'Usr_loc': 'Kasoa', 'hashtags': []}
{'text': 'RT @Flashyasf: All this social media shit don’t matter make sure you’re happy in real life speaking_head ', 'id': 1394327990725656576, 'Usr_loc': 'Brooklyn, NY', 'hashtags': []}
{'text': "RT @dotmoovs: Announcement: we're excited to share the listing date of $MOOV on Polkastarter will be May 25th 2021  rocket \n\nApply to our whitelis…", 'id': 1394327990721470478, 'Usr_loc': 'Moldova', 'hashtags': []}
{'text': "RT @FNCreate: Today's Creative Showcase is a test of speed and skill.\n\nRace through all 222 levels in this challenging Deathrun by @KM_Old.…", 'id': 1394327990671224836, 'Usr_loc': 'Nitro, WV', 'hashtags': []}
{'text': '@TheloniousPhunk @willy1555 @noname Yes exactly.  Why do they skirt around the issue and paint the picture all rose… https://t.co/du1h53RzjI', 'id': 1394327990624931841, 'Usr_loc': 'Canada', 'hashtags': []}
{'text': 'RT @OliverJones_19: Nothing good ever comes from staying in your comfort zone..\n\nIt’s a really weird irony but taking no risks in life is a…', 'id': 1394327993481375747, 'Usr_loc': None, 'hashtags': []}
{'text': 'RT @KyleKakesxxx: Muscle daddy saw me in a slutty outfit in the club and pulled me in the bathroom to give me his load \n\n50% my onlyfans fo…', 'id': 1394327993414209542, 'Usr_loc': 'Detroit', 'hashtags': []}
{'text': '@sweetmess76 @JennaEllisEsq What’s the problem with wearing a mask,  for the benefit of all, for the benefit of all… https://t.co/Gr1VtF7RKn', 'id': 1394327993498046468, 'Usr_loc': None, 'hashtags': []}
{'text': 'RT @cassieclare: I love this idea! Please post fanart of your favorite LGBTQ characters on this thread!  white_flag ️\u200d rainbow ', 'id': 1394327993573646340, 'Usr_loc': None, 'hashtags': []}
{'text': "i know spoiler sites claim art is coming back in a twist but im still thinking about how she shouldn't have gone ho… https://t.co/wjNs2snNRM", 'id': 1394327993208688646, 'Usr_loc': None, 'hashtags': []}
{'text': 'RT @mmodeww_: mau cari mutual stay, nctzen, wayzenni, atiny, deobi, blink, ikonic, army, exo-l, melody, buddy, aroha, ahgase, myday, carat,…', 'id': 1394327993720336395, 'Usr_loc': 'ily', 'hashtags': []}
{'text': 'RT @MedicVet68: AS PART OF THE 81 MILLION MAJORITY, I am sick/tired of the Minority ruling the roost. It is time for us to use all LEGAL me…', 'id': 1394327993745612802, 'Usr_loc': 'Heartland USA', 'hashtags': []}
{'text': 'RT @jonasabadilla: Better suggestion: Don’t call at all unless you messaged the person beforehand to ask permission for a call', 'id': 1394327993707745284, 'Usr_loc': None, 'hashtags': []}
{'text': 'RT @AOC: Friendly reminder to keep generously tipping your bartenders, servers, delivery, venue, and hospitality workers.  smiling_face ️ rose ', 'id': 1394327993728778240, 'Usr_loc': 'Minnesota, USA', 'hashtags': []}
{'text': 'RT @kekeysl: money be buying my happiness, ion know bout y’all  loudly_crying_face .', 'id': 1394327993846222851, 'Usr_loc': None, 'hashtags': []}
{'text': 'RT @bitterxjazz: Dearra cheat tf back that’s all.  https://t.co/wivGYeKb00', 'id': 1394327993863086085, 'Usr_loc': 'Where the money RESIDES ', 'hashtags': []}
{'text': "@DOPreston Yeah, but we all know we Brits don't need experts. We're better than that.", 'id': 1394327993921810437, 'Usr_loc': None, 'hashtags': []}
{'text': '@artisanrocky How did we go from one to the other in such a short time?  Perhaps reverse engineering of ufo materia… https://t.co/3IpBIFv2q7', 'id': 1394327993925849090, 'Usr_loc': 'Washington, USA', 'hashtags': []}
{'text': "RT @Voice_For_India: For those Idiots: Hamas is a terrorist organization..!\nWhere ever there's violence in any part of the world, guess wha…", 'id': 1394327994022330369, 'Usr_loc': 'Bhaagya Nagari, Bhaarath', 'hashtags': []}
{'text': '@Israel But was this REALLY the best way to do it? Y’all shooting modifies back and forth and y’all making it look… https://t.co/3ICSjobQl3', 'id': 1394327993993076737, 'Usr_loc': 'rip stevie 🕊', 'hashtags': []}
{'text': 'I don’t give relationship advice no more cause the mf gone keep going back anyways so now all I say is “ go back un… https://t.co/WQBSdkf86K', 'id': 1394327994139824130, 'Usr_loc': 'Hattiesburg, MS', 'hashtags': []}
{'text': 'RT @divinecinderely: crying. the most excited ever. cannot wait to see you preform all of our favorite songs.\U0001fac2my heart is filled w so so mu…', 'id': 1394327994236215296, 'Usr_loc': 'she/her ', 'hashtags': []}
{'text': 'RT @amberkgoodwin: Sorry not sorry in advance for all the law graduation photos y’all are about to get. I’m 41, never been married, have no…', 'id': 1394327994328571913, 'Usr_loc': 'where the flowers bloom', 'hashtags': []}
{'text': 'RT @ScottZILWarrior: I will send one random person $1000 all you have to do is RT and be following myself &amp; @TenseT_io \n\nMust be a member o…', 'id': 1394327994395594756, 'Usr_loc': 'Louisiana, USA', 'hashtags': []}
{'text': '@Michael80789776 A good comedian makes all people laugh because the joke works even when you do not agree with it.… https://t.co/9NGVby3275', 'id': 1394327994332815364, 'Usr_loc': None, 'hashtags': []}
{'text': 'RT @thetree_man: ISLAM is a DEATH CULT, The word ISLAM Means Submit/Surrender, The entire contents of ALL the Hadiths &amp; the Quran itself ar…', 'id': 1394327994081157125, 'Usr_loc': None, 'hashtags': []}
{'text': 'All in a days work.. https://t.co/lxa8h0VZGC', 'id': 1394327993661722629, 'Usr_loc': 'Twitter, you moron.', 'hashtags': []}
{'text': "@RollingStone It's awful when entertainers you have loved all your life turn out to complete turds.  Of course, the… https://t.co/6AvK2X3xhW", 'id': 1394327994320183308, 'Usr_loc': 'Knoxville, Tennessee USA', 'hashtags': []}
{'text': "Y'all...our landlord hit our fucking car", 'id': 1394327994550812673, 'Usr_loc': None, 'hashtags': []}
{'text': 'RT @cryptopolica: $100 Giveaway! • Ends in 4 days\n\nJust:\n1. Access this link: https://t.co/nt8FYn3wdx\n2. Vote for $HOKK (See photo for refe…', 'id': 1394327994445950998, 'Usr_loc': None, 'hashtags': []}
{'text': "RT @_excujimeee: @btsvotingorg @BTS_twt Just finished voting all my accounts hehe, here's mine ~ I forgot to ss the ones I voted earlier al…", 'id': 1394327994513170441, 'Usr_loc': None, 'hashtags': []}
{'text': 'RT @FatherNitty: Get some rest thru the day then at about 2:17am that night go to  83rd &amp; international. You should see about 2 or 3 full f…', 'id': 1394327994521427969, 'Usr_loc': 'Nayarit 🇲🇽', 'hashtags': []}
{'text': 'RT @GabrielleGrand9: I mean if that’s all you guys wanna do then do you, but we need to prioritize promoting Butter over streaming the teas…', 'id': 1394327994714529793, 'Usr_loc': None, 'hashtags': []}
{'text': 'RT @Cashbro303: $100 in 24hrs red_heart ️\n\n-RT\n-Go to https://t.co/YnfF7Xv3rT\n-Click on All time best\n-Scroll down and Upvote Raven X https://t.co/pc…', 'id': 1394327994617921536, 'Usr_loc': None, 'hashtags': []}
{'text': "@bravenew_orwell Doctors now want HIV tests.  So let's see who all has that.  I had my test.  I was negative.  We c… https://t.co/z447Qs7E5f", 'id': 1394327994521595906, 'Usr_loc': 'Ohio, USA', 'hashtags': []}
{'text': 'y’all think i’m joking but i’m really not  nail_polish  light_skin_tone  https://t.co/xsPctjPyMd', 'id': 1394327994018287617, 'Usr_loc': None, 'hashtags': []}
{'text': 'RT @thegirlyouenvyy: How men should spoil women all year round', 'id': 1394327994714427402, 'Usr_loc': 'Orlando, FL', 'hashtags': []}
{'text': 'RT @katielannan: Gov. Charlie Baker will end the COVID-19 state of emergency on June 15, per his office. All industries permitted to open M…', 'id': 1394327994701860866, 'Usr_loc': 'Massachusetts, USA', 'hashtags': []}
{'text': 'If they do that I will haunthybe jp down  unamused_face ', 'id': 1394327994907332609, 'Usr_loc': 'she/her', 'hashtags': []}
{'text': '@Asta_5leaf Fr that plushie is worth all my life savings', 'id': 1394327995024879621, 'Usr_loc': None, 'hashtags': []}
{'text': "RT @mayotl: Sweet Pinup!!!\nTurner Family Terror / BUDDY!\n2 universes collide for this limited print. Just back both projects on KS and it's…", 'id': 1394327994882158600, 'Usr_loc': 'Culver City, CA', 'hashtags': []}
{'text': 'RT @Geuice301: realizing more everyday that nobody stands 10 on what they believe in. Y’all just see what’s trending and go where the crowd…', 'id': 1394327995146510338, 'Usr_loc': None, 'hashtags': []}
{'text': 'Y’all gotta be stopped at some point lmao', 'id': 1394327995033309187, 'Usr_loc': None, 'hashtags': []}
{'text': 'RT @_dnxw: i used to be the “chaser” in all of my friendships &amp; relationships.. literally begging for reciprocation and to be treated corre…', 'id': 1394327995171672065, 'Usr_loc': '🦋', 'hashtags': []}
{'text': 'Why go to Facebook when all the drama is here!  rolling_on_the_floor_laughing ', 'id': 1394327995108708359, 'Usr_loc': 'Mars (chocolate planet)', 'hashtags': []}
{'text': 'RT @monicaamore_13: Be like this sub. \nHand over you body/mind/soul/wallet over to me\nItll all feel so natural. \nLink in bio. \nNo excuses.…', 'id': 1394327995255492608, 'Usr_loc': None, 'hashtags': []}
{'text': 'RT @fascinatorfun: “the properties of the virus are probably not determined by single mutations in isolation, but in how several mutations…', 'id': 1394327995096182787, 'Usr_loc': 'leatherhead surrey England ', 'hashtags': []}
{'text': 'Guys ,one request whoever is Commenting on the insta account for nominating Aly , pls keep liking all the comments… https://t.co/3g3sqUakg2', 'id': 1394327997654646785, 'Usr_loc': None, 'hashtags': []}
{'text': '*cries in broke*', 'id': 1394327997725896706, 'Usr_loc': '05 | s/her | multi 𖥧', 'hashtags': []}
{'text': "RT @dotmoovs: Announcement: we're excited to share the listing date of $MOOV on Polkastarter will be May 25th 2021  rocket \n\nApply to our whitelis…", 'id': 1394327997805629455, 'Usr_loc': None, 'hashtags': []}
{'text': 'A reminder that all drivers should be prepared to reduce speed when driving near a vehicle with flashing amber, red… https://t.co/STguGSKN5y', 'id': 1394327997457391618, 'Usr_loc': 'Quesnel, British Columbia', 'hashtags': []}
{'text': 'RT @Farda_Alphonso: He got to do me first to show me he’s all business.', 'id': 1394327997772075008, 'Usr_loc': 'htine/dfw/atl', 'hashtags': []}
{'text': '@Stabler6times it will say all we as fans need to know about the manager', 'id': 1394327997990199302, 'Usr_loc': None, 'hashtags': []}
{'text': '@brownyboyfelix Do they need to have an age, those are plushies after all-', 'id': 1394327998011265029, 'Usr_loc': 'she/her', 'hashtags': []}
{'text': "RT @TBRVorg: WHEN IT START\nI DON'T WANT ANYBODY TO LAMENT, THEY HAVE KILLED US HERE AND THERE, ALL I WANT IS ACTION\n\n~ @MaziNnamdiKanu\n16/0…", 'id': 1394327998069882881, 'Usr_loc': None, 'hashtags': []}
{'text': 'RT @RoseGauntlet: Less than 24 hours til launch and we just hit 1300 followers on our Kickstarter page! \n\nWe are so excited to get this pro…', 'id': 1394327997981724674, 'Usr_loc': None, 'hashtags': []}
{'text': 'RT @ScottZILWarrior: I will send one random person $1000 in 48hrs all you have to do is RT and be following myself \n\nTurn  bell  on for daily gi…', 'id': 1394327998094970881, 'Usr_loc': None, 'hashtags': []}
{'text': 'RT @PoonchDm: Today personally visited various vaccination / testing points .\n# we have started a campaign for 100 % vaccination of above 4…', 'id': 1394327998107582464, 'Usr_loc': 'Jammu and Kashmir', 'hashtags': []}
{'text': 'and the worst of it all, i still believe in you', 'id': 1394327998254440453, 'Usr_loc': 'everywhere', 'hashtags': []}
{'text': "@avfc2413 @jdbluesME I'm all for banter against our rivals but the difference between us both is you have wealthy o… https://t.co/ki0zoUju2r", 'id': 1394327998023802886, 'Usr_loc': 'Birmingham, England', 'hashtags': []}
{'text': "@aurorawestx Don't we all lol", 'id': 1394327998187384832, 'Usr_loc': 'Purgatory (Wisconsin)', 'hashtags': []}
{'text': 'RT @rajasekharv1979: All this started after Sadhguru Jaggi Vasudev filed a PIL seeking an open audit of the temple property management in T…', 'id': 1394327998296301571, 'Usr_loc': None, 'hashtags': []}
{'text': 'RT @dorisolaitan_: A relationship where y\'all "fix it" together with respectable communication&gt;&gt;&gt;', 'id': 1394327998396989440, 'Usr_loc': '6 0 1 ♡', 'hashtags': []}
{'text': "RT @lulbabylina559: being all about 1 person isn't hard, y'all just hoes.", 'id': 1394327998426406918, 'Usr_loc': None, 'hashtags': []}
{'text': "@Toby_Christie @murbanvideo @andyblackmore I'm ok with this on the condition we all don't end up with Todd Souza-style numbers.", 'id': 1394327998527156227, 'Usr_loc': 'East Amherst, New York', 'hashtags': []}
{'text': 'RT @ConfidenceDutta: A genuine smile is one of the world’s rarest treasures  butterfly  sparkles \n\nThis is why we’re here. All of us. To make the world smile…', 'id': 1394327998510161920, 'Usr_loc': 'The Land Of Seekers', 'hashtags': []}
{'text': 'i’ve never listened to the in flight safety instructions until i flew to hawaii. all of a sudden i’m taking notes', 'id': 1394327998678061058, 'Usr_loc': None, 'hashtags': []}
{'text': '@JustJuicy88 @banksliketyra Y’all will have to pick my feet up from the side of the road', 'id': 1394327998610952193, 'Usr_loc': 'East$ide,Gary', 'hashtags': []}
{'text': 'RT @ScottZILWarrior: I will send one random person $500 in 48hrs all you have to do is RT and be following myself &amp; @ispolink \n\nShow the sp…', 'id': 1394327998640365576, 'Usr_loc': None, 'hashtags': []}
{'text': 'my roth happy rn from all of my $T investments  smiling_face_with_heart-eyes ', 'id': 1394327998665568263, 'Usr_loc': 'Miami, FL', 'hashtags': []}
{'text': '5-2-1 this morning to gain 4.33u  fire  fire  fire ', 'id': 1394327998728445955, 'Usr_loc': 'New York City, NY', 'hashtags': []}
{'text': '@salahmaker @HeerJeet No I believe Humans, Aliens etc etc are all Gods creatures. The universe is really a sandbox… https://t.co/tvlvq5iU8k', 'id': 1394327998837448715, 'Usr_loc': 'New York, NY', 'hashtags': []}
{'text': 'fuck the like us series all my homies are tired of the like us series. society will know peace once we start gettin… https://t.co/9Si90jQ3Dv', 'id': 1394327998963359750, 'Usr_loc': 'she/her | 20 | 🇨🇴', 'hashtags': []}
{'text': "RT @exo_statistics: 'DON'T FIGHT THE FEELING' has now surpassed 108 THOUSAND (108,000) pre-orders on Ktown4u alone!\n\nPB 1 - 43,576\nPB 2 - 3…", 'id': 1394327998984187914, 'Usr_loc': 'EXO PLANET', 'hashtags': []}
{'text': '@Ghostly_Host Hard to pick, they are all burned at both ends...', 'id': 1394327999051304964, 'Usr_loc': 'portland oregon', 'hashtags': []}
{'text': 'RT @Brittan96355048: You would make an incredible prime minister @MaximeBernier  I so want you to be our next PM', 'id': 1394327998980136960, 'Usr_loc': None, 'hashtags': []}
{'text': 'Not going to say anything against any of the players departing. Thanks for your time at Aberdeen. Hope the moves al… https://t.co/tFQIHgKP0F', 'id': 1394327999043063808, 'Usr_loc': 'Aberdeen, Scotland', 'hashtags': []}
{'text': 'RT @JJK_Times: It’s wondrous to see how modest but confident, mature yet passionate Jungkook is as he regards his self. He admits the press…', 'id': 1394327999198097414, 'Usr_loc': None, 'hashtags': []}
{'text': "RT @NiaRubina: if u're officially FC ur idol's following u &amp; u're presenting whole FD then still u're all these things seriously as in ur W…", 'id': 1394327999126794243, 'Usr_loc': 'India', 'hashtags': []}
{'text': 'RT @samstein: All of this from @jonathanvswan is jaw dropping. but this line in particular stands out\n\n"[DOD Sec] Miller told associates he…', 'id': 1394327999131000840, 'Usr_loc': None, 'hashtags': []}
{'text': 'RT @SITHLEIAS: this pisses me tf off because lgbtq+ people are used as an excuse to not support muslims human rights when lgbt muslims exis…', 'id': 1394327999080714248, 'Usr_loc': "in ur dm's", 'hashtags': []}
{'text': "So er!c and arma@n's song will be out on the same day as butter.. A lot of locals and going to stream it so we have… https://t.co/XdkGwq4IOv", 'id': 1394327999118405634, 'Usr_loc': 'my home 방탄소년단 ', 'hashtags': []}
{'text': 'I don\'t know why you are so warm and fuzzy about the fucker, after all he\'s done.\n\n"Despise" is in my rear view mir… https://t.co/X0ttYiEVNt', 'id': 1394327999135289349, 'Usr_loc': None, 'hashtags': []}
{'text': 'RT @misanthropicc92: Someone once said Twitter is the sociology seminar where no one has done the reading but everyone is speaking. I think…', 'id': 1394327999345004554, 'Usr_loc': 'my bag', 'hashtags': []}
{'text': 'RT @Fact: Success is no accident. It is hard work, perseverance, learning, studying, sacrifice and most of all, love of what you are doing.', 'id': 1394327999449911303, 'Usr_loc': None, 'hashtags': []}
{'text': 'RT @FlNE91LINE: “are u ok?” bro, i have just seen harry styles as a watermelon, ballerina &amp; cowboy i’ve seen him smushing his face into a h…', 'id': 1394327999437316103, 'Usr_loc': 'otra 8.5.15 | hslot 6.15.18', 'hashtags': []}
{'text': 'RT @AlphaScot4: What you staring at??  smiling_face_with_horns  smiling_face_with_horns  sweat_droplets  sweat_droplets Come Join me! \n\n fire  Hot New Content Daily! Come get filthy with me  smiling_face_with_horns  fire  \n\nhttps://t.co/jzv3t96dJM\n\n police_car_light H…', 'id': 1394327999516925955, 'Usr_loc': 'United States', 'hashtags': []}
{'text': 'RT @SidrahDP: Another day. Another Muslim. \n\nDo we have to outrage until Indian media ( except Maktoob) pays attention? \n\nAnd please do not…', 'id': 1394327999504293891, 'Usr_loc': None, 'hashtags': []}
{'text': 'RT @vinod_sharma: This is called hoarding. Disgraceful selfishness when a scarce life-saving drug is needed by the whole world.', 'id': 1394327999529422850, 'Usr_loc': 'मुंबई, भारत', 'hashtags': []}
{'text': 'RT @___24SM: I aint got none so fo sho', 'id': 1394327999529439234, 'Usr_loc': '🇨🇩🇨🇦', 'hashtags': []}
{'text': 'RT @reeenns: They didn’t leave their pet fish y’all think they gonna leave their land', 'id': 1394327999755931655, 'Usr_loc': 'Kuala Lumpur', 'hashtags': []}
{'text': 'RT @ChiSportUpdates: "Players around the league now know that the Chicago Bulls are all about winning. I think players will want to play fo…', 'id': 1394328001861521416, 'Usr_loc': 'Belo Horizonte, Brasil', 'hashtags': []}
{'text': 'All You Need About the Great\xa0Poet https://t.co/9IEX5bk039', 'id': 1394328001878319107, 'Usr_loc': None, 'hashtags': []}
{'text': "I love all the people that support me though, legit wouldn't be here without y'all\nI feel like things will only go… https://t.co/OEzhn479yY", 'id': 1394328001869910017, 'Usr_loc': 'Schlatt & Co.', 'hashtags': []}
{'text': "RT @BlockClubCHI: This family fought a West Side school's ban on Black hairstyles — and now Illinois could ban hair discrimination in all s…", 'id': 1394328001559531527, 'Usr_loc': 'Chicago, IL', 'hashtags': []}
{'text': '@paulbest2 Claiming it was fraudulent so invalid wouldn’t have won GE2019 for Labour. Not even the LibDems tried th… https://t.co/kJ5xZ0OqoP', 'id': 1394328001257644040, 'Usr_loc': None, 'hashtags': []}
{'text': 'I am so sorry for this tweet  face_with_tears_of_joy \nMy friends usually send images like that to me at midnight and all I can do is laugh… https://t.co/xH7NivHjfD', 'id': 1394328001886621701, 'Usr_loc': None, 'hashtags': []}
{'text': "RT @maenasheryn: posted this on my igstory and received this comment from a follower. it's like they don't know i'm openly gay, it's all ov…", 'id': 1394328001962135560, 'Usr_loc': 'Selangor, Malaysia', 'hashtags': []}
{'text': 'In Taunggyi, Shan State, junta thugs inspect all the bypassing vehicles in front of Hnin Lwin Lwin Photography shop… https://t.co/x2JMQXtUyV', 'id': 1394328001840508930, 'Usr_loc': None, 'hashtags': []}
{'text': 'RT @ConfidenceDutta: A genuine smile is one of the world’s rarest treasures  butterfly  sparkles \n\nThis is why we’re here. All of us. To make the world smile…', 'id': 1394328002062798852, 'Usr_loc': 'India', 'hashtags': []}
{'text': "RT @Yulietah2: Let's win this🥰🥰 , just like and retweet \nBraid by @H_A_W_A_H https://t.co/wS3PwDxZqv https://t.co/Us9kj27qjS", 'id': 1394328002004066311, 'Usr_loc': None, 'hashtags': []}
{'text': 'RT @WinstonCProject: .@MattHancock Agitated by this one question over the £180m PPE report today. Hancock has a Covid inquiry ahead of him.…', 'id': 1394328001907658754, 'Usr_loc': 'Liverpool', 'hashtags': []}
{'text': '@MEMRIReports @TareqAlSuwaidan shame on you, you baby killer supporter, all u do is take clips', 'id': 1394328002046091265, 'Usr_loc': None, 'hashtags': []}
[truncated: 3,988,412 more chars]
